# Supplementary material for: Dysregulated systemic metabolism in a Down syndrome mouse model
Source: PubMed Central journal article supplement — Mol Metab. 2022 Dec 29;68:101666. doi: 10.1016/j.molmet.2022.101666 (PMC9841171; doi:10.1016/j.molmet.2022.101666), 2022-12-29
Supplement: mmc1.pdf [file mmc1.pdf]

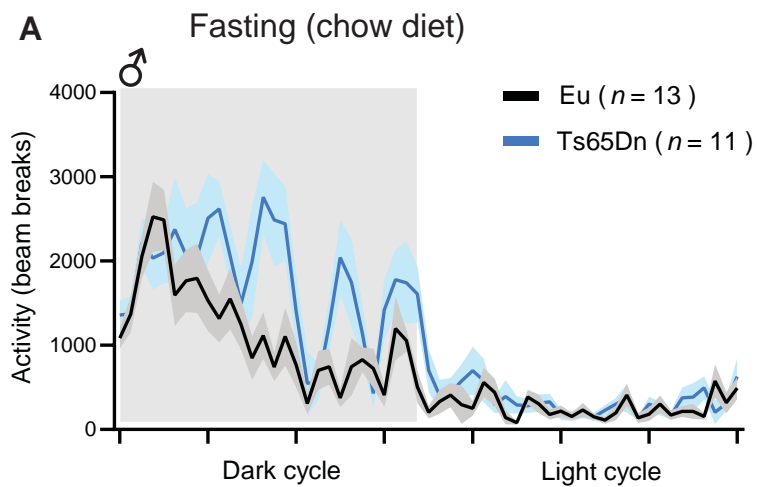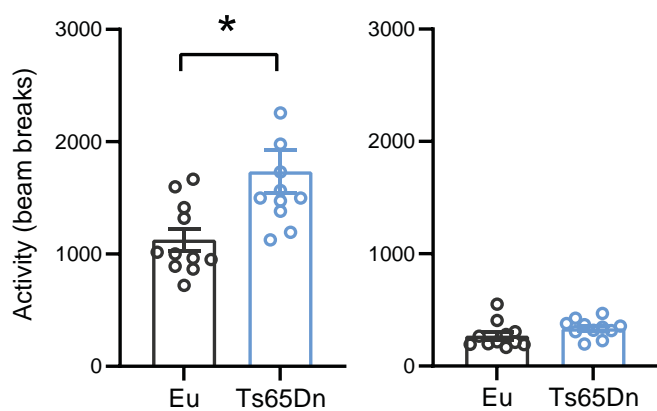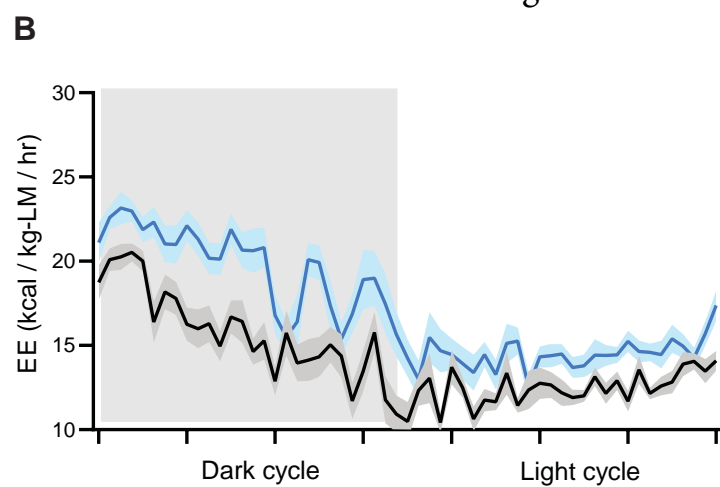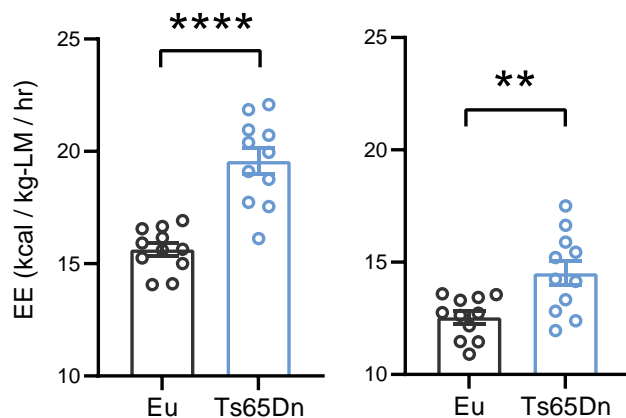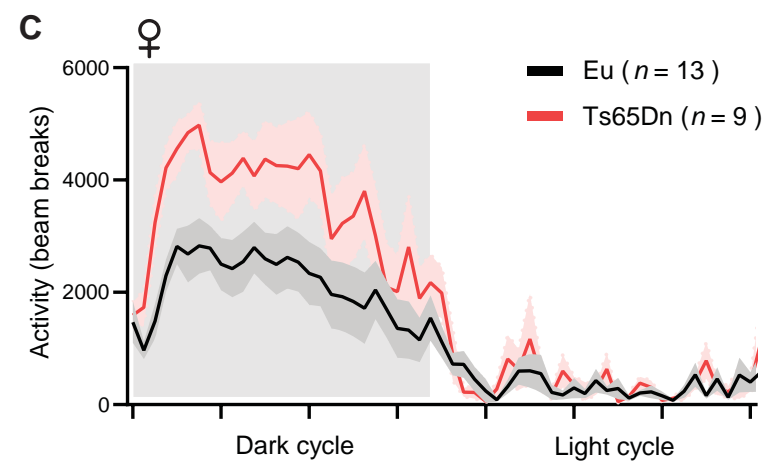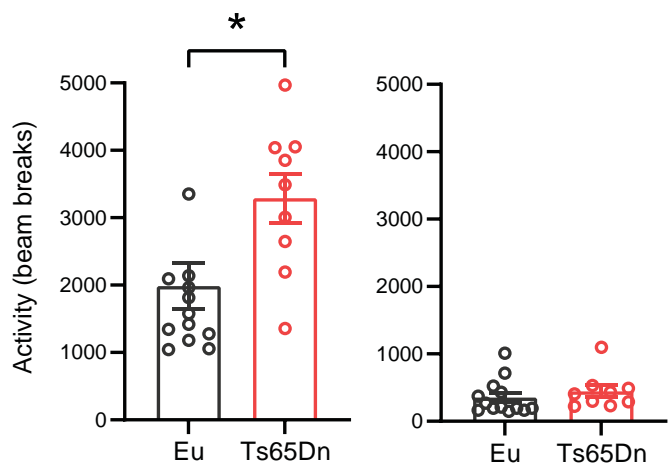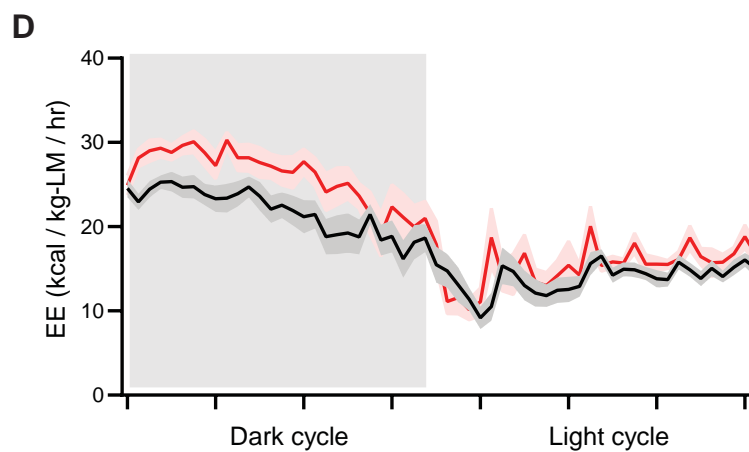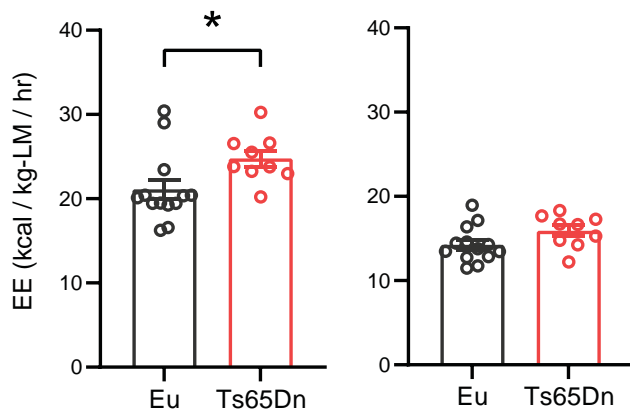

**Figure S1. Elevated physical activity and energy expenditure during the 24 hour fasting period in chow-fed Ts65Dn mice.** A-B) Physical activity level (A) and energy expenditure (B) of male Ts65Dn and euploid mice across the circadian cycle during a 24 hr fast. Bar graphs indicate cumulative physical activity and energy expenditure in the dark and light photocycle. C-D). Physical activity level (C) and energy expenditure (D) of female Ts65Dn and euploid mice across the circadian cycle during a 24 hr fast. Bar graphs indicate cumulative physical activity and energy expenditure in the dark and light photocycle. All data are presented as mean  $\pm$  SEM. \*  $P < 0.05$ ; \*\*  $P < 0.01$ ; \*\*\*\*  $P < 0.0001$

Fig. S2

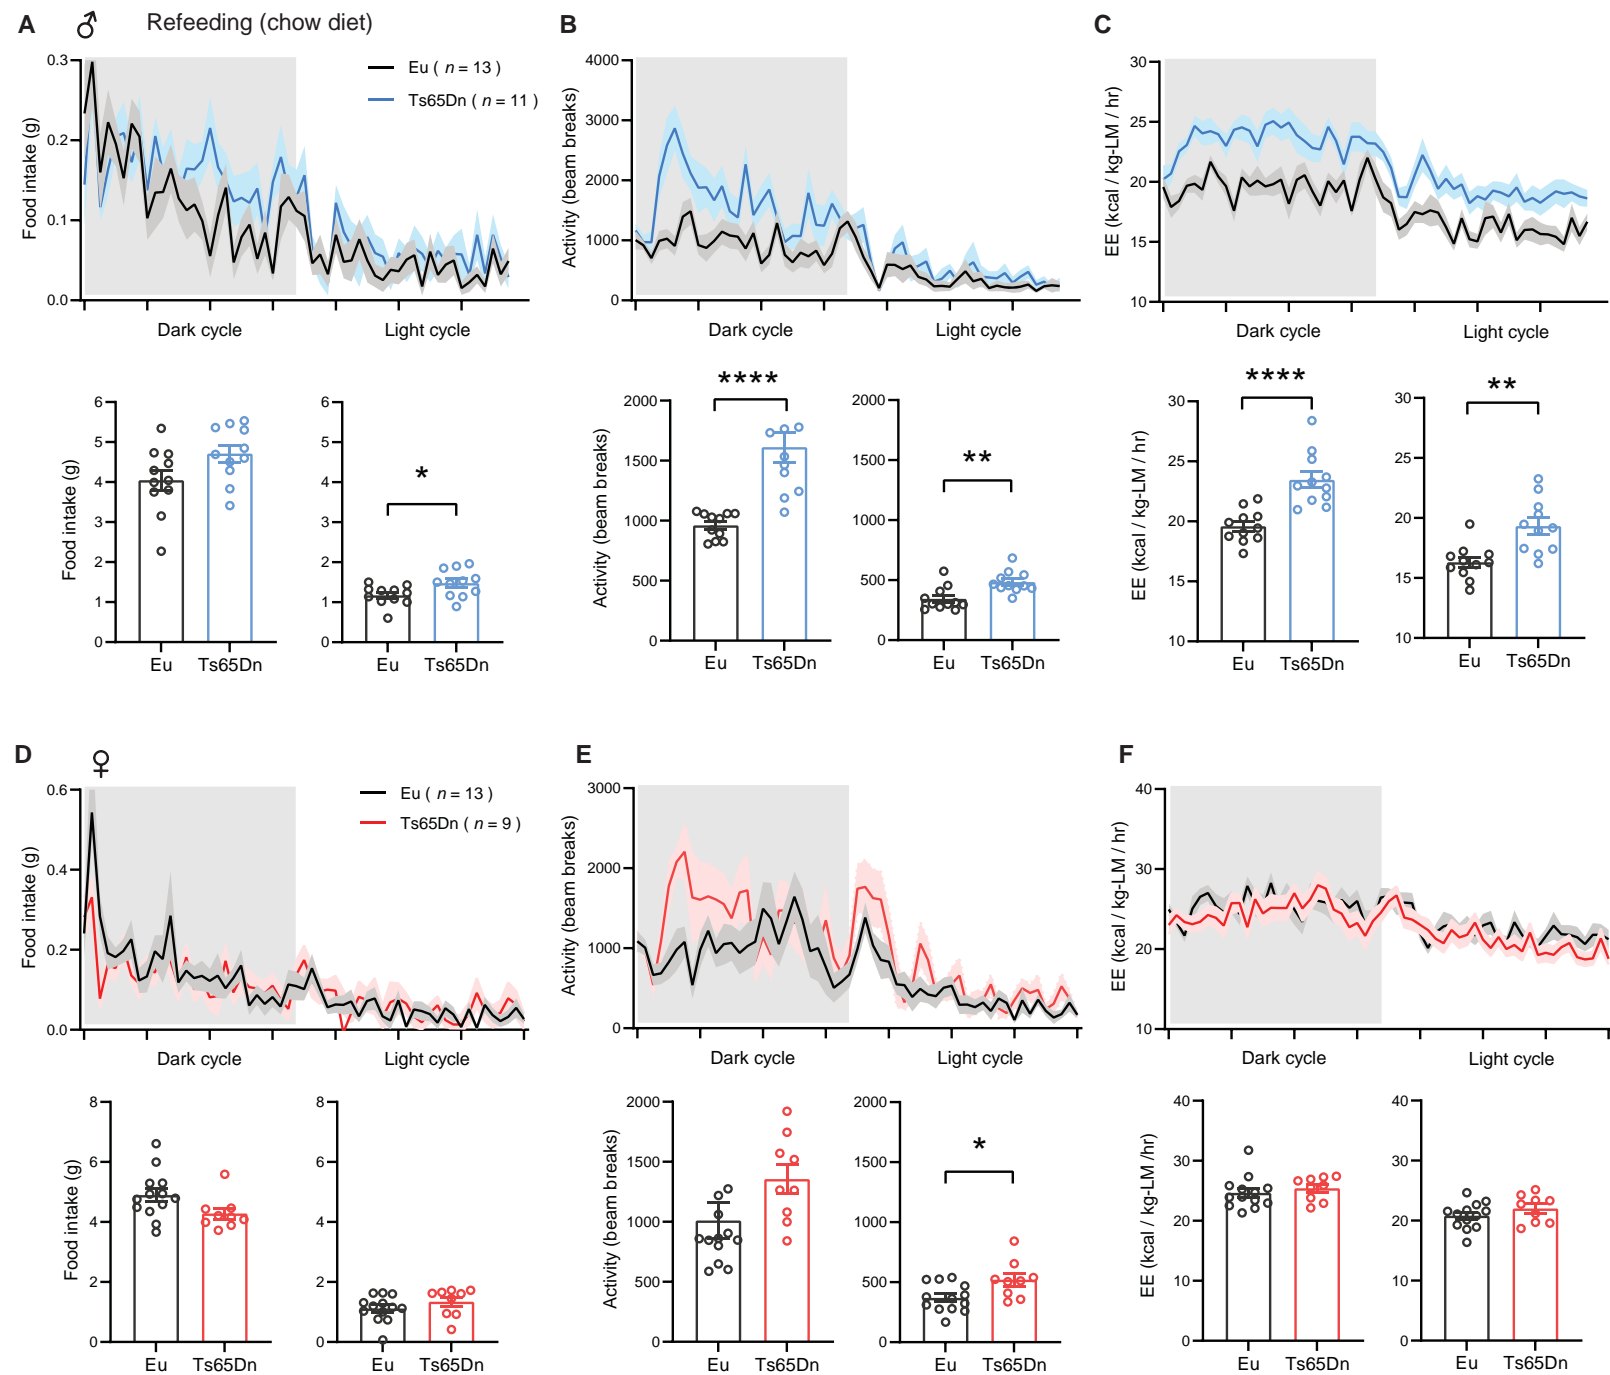

**Figure S2. Food intake, physical activity, and energy expenditure during the refeeding period in chow-fed Ts65Dn mice.** A-C) Food intake (A), physical activity level (B), and energy expenditure (C) of male Ts65Dn and euploid mice across the circadian cycle during a 24 hr refeeding period after food deprivation. Bar graphs indicate cumulative food intake, physical activity, and energy expenditure in the dark and light photocyclus. D-F) Food intake (D), physical activity level (E), and energy expenditure (F) of female Ts65Dn and euploid mice across the circadian cycle during a 24 hr refeeding period after food deprivation. Bar graphs indicate cumulative food intake, physical activity, and energy expenditure in the dark and light photocyclus. All data are presented as mean  $\pm$  SEM. \*  $P < 0.05$ ; \*\*  $P < 0.01$ ; \*\*\*\*  $P < 0.0001$

Fig. S3

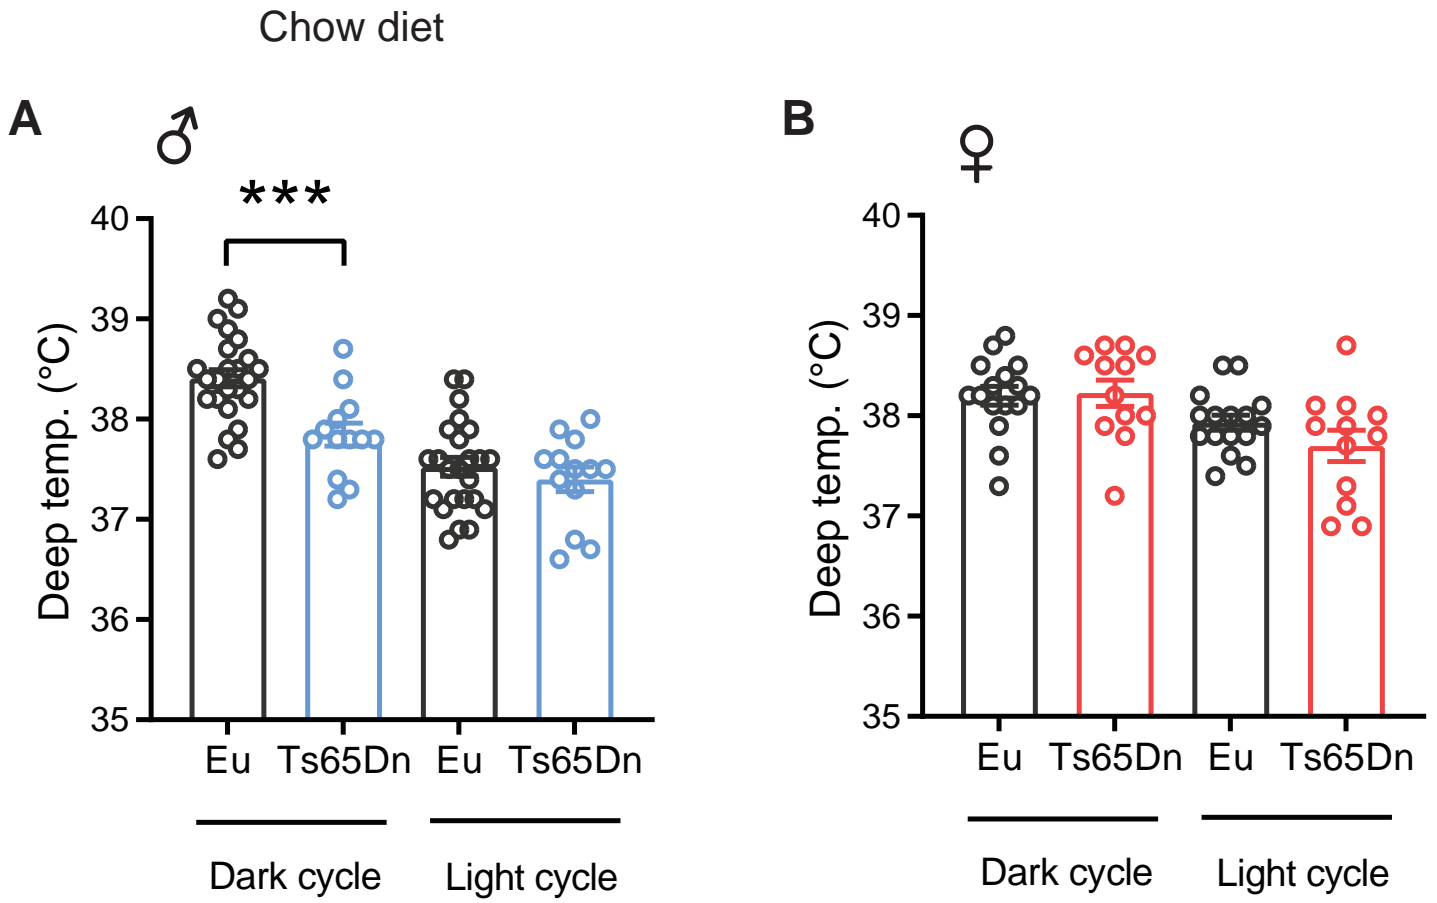

**Figure S3. Body temperature in chow-fed Ts65Dn mice.** A-B) Deep colonic temperature in male (A) and female (B) Ts65Dn and euploid mice in the dark and light cycle. Sample size for male (Eu,  $n = 24$ ; Ts65Dn,  $n = 13$ ) and female (Eu,  $n = 16$ ; Ts65Dn,  $n = 12$ ) mice. All data are presented as mean  $\pm$  SEM.

\*\*\*  $P < 0.001$

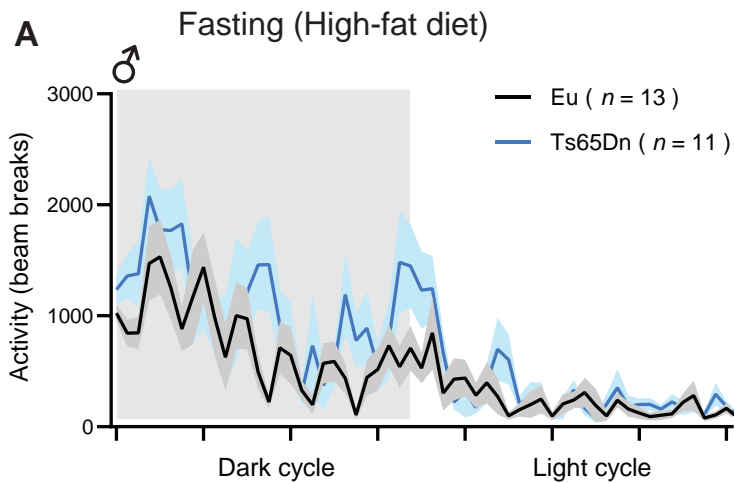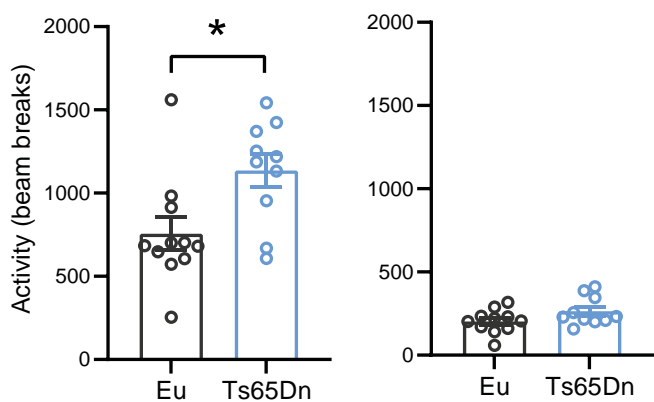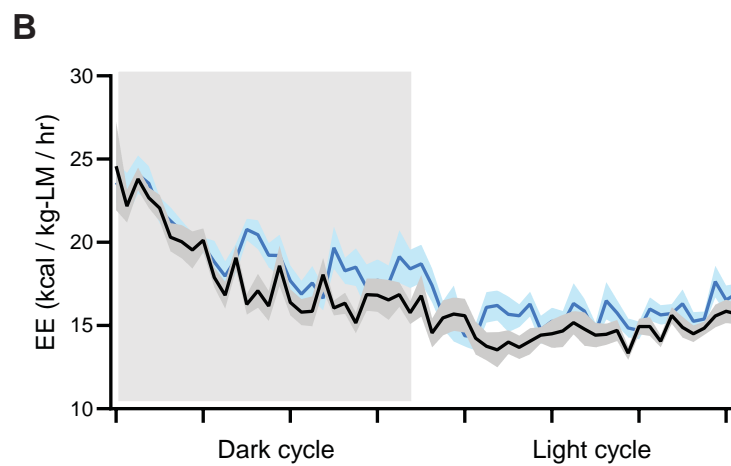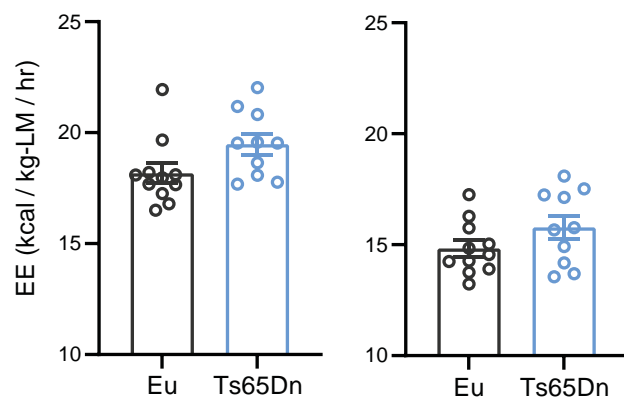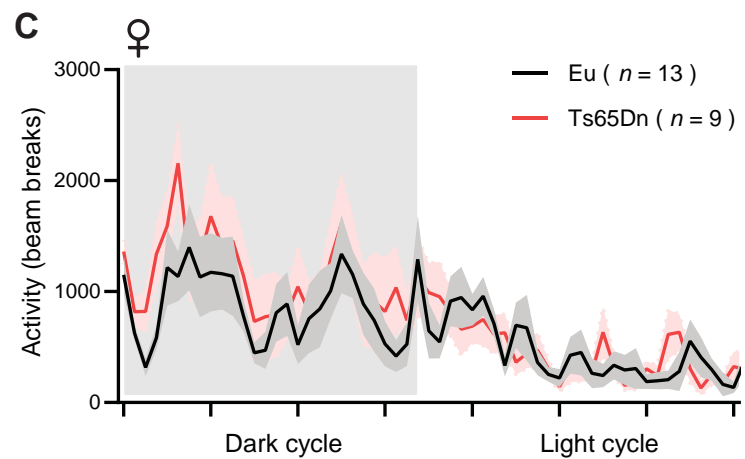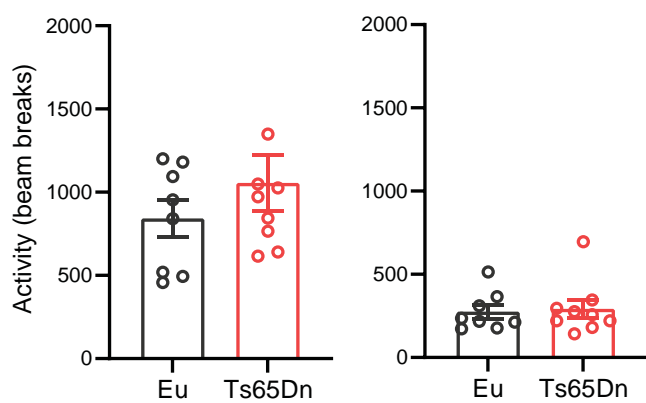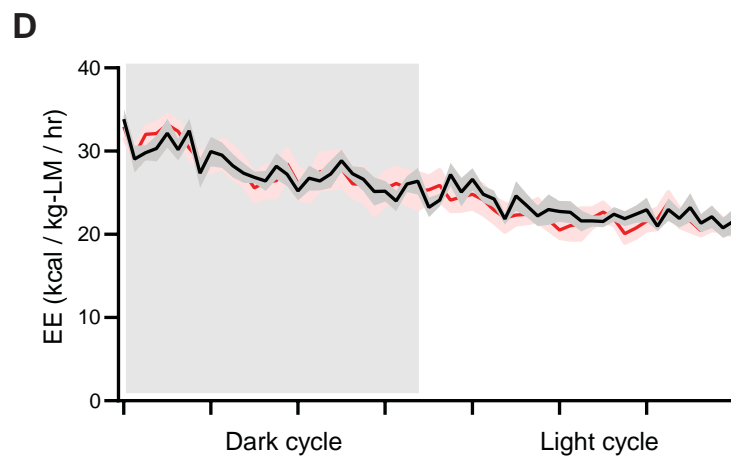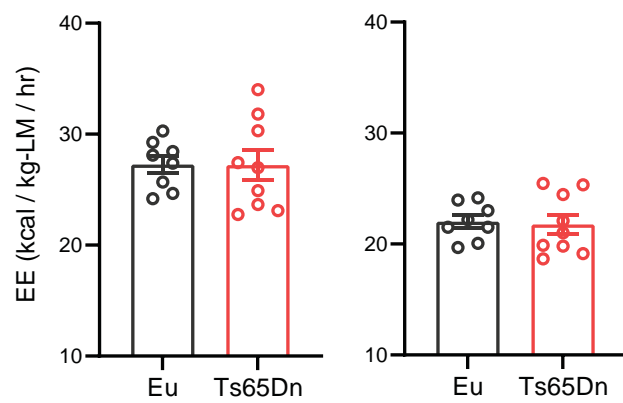

**Figure S4. Physical activity and energy expenditure during a 24 hour fasting period in high-fat diet (HFD)-fed Ts65Dn mice.** A-B) Physical activity level (A) and energy expenditure (B) of male Ts65Dn and euploid mice across the circadian cycle during a 24 hr fast. Bar graphs indicate cumulative physical activity and energy expenditure in the dark and light photocycle. C-D). Physical activity level (C), and energy expenditure (D) of female Ts65Dn and euploid mice across the circadian cycle during a 24 hr fast. Bar graphs indicate cumulative physical activity and energy expenditure in the dark and light photocycle. All data are presented as mean  $\pm$  SEM. \*  $P < 0.05$



Fig. S5

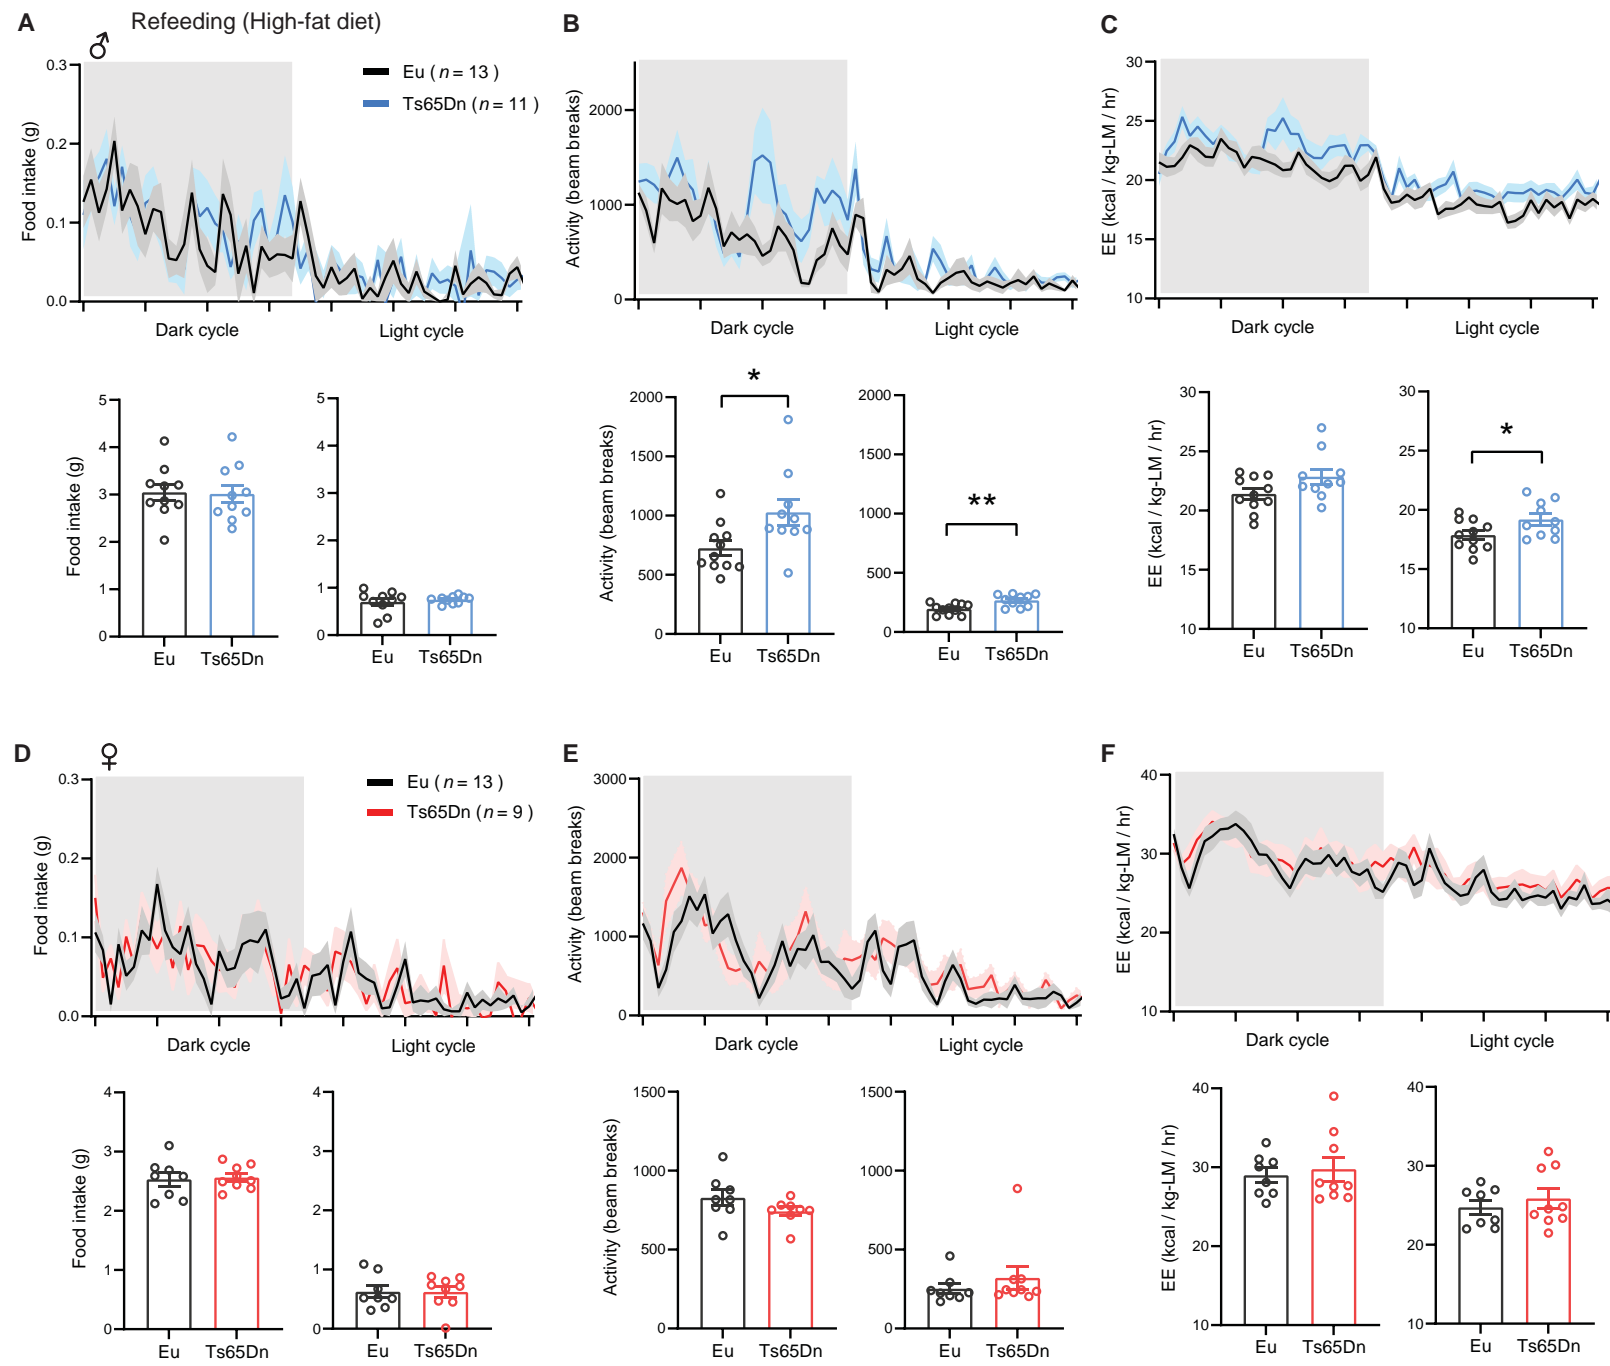

**Figure S5. Food intake, physical activity, and energy expenditure during the refeeding period in HFD-fed Ts65Dn mice.** A-C) Food intake (A), physical activity level (B), and energy expenditure (C) of male Ts65Dn and euploid mice across the circadian cycle during a 24 hr refeeding period after food deprivation. Bar graphs indicate cumulative food intake, physical activity, and energy expenditure in the dark and light photocycle. D-F) Food intake (D), physical activity level (E), and energy expenditure (F) of female Ts65Dn and euploid mice across the circadian cycle during a 24 hr refeeding period after food deprivation. Bar graphs indicate cumulative food intake, physical activity, and energy expenditure in the dark and light photocycle. All data are presented as mean  $\pm$  SEM. \*  $P < 0.05$ ; \*\*  $P < 0.01$

Fig. S6

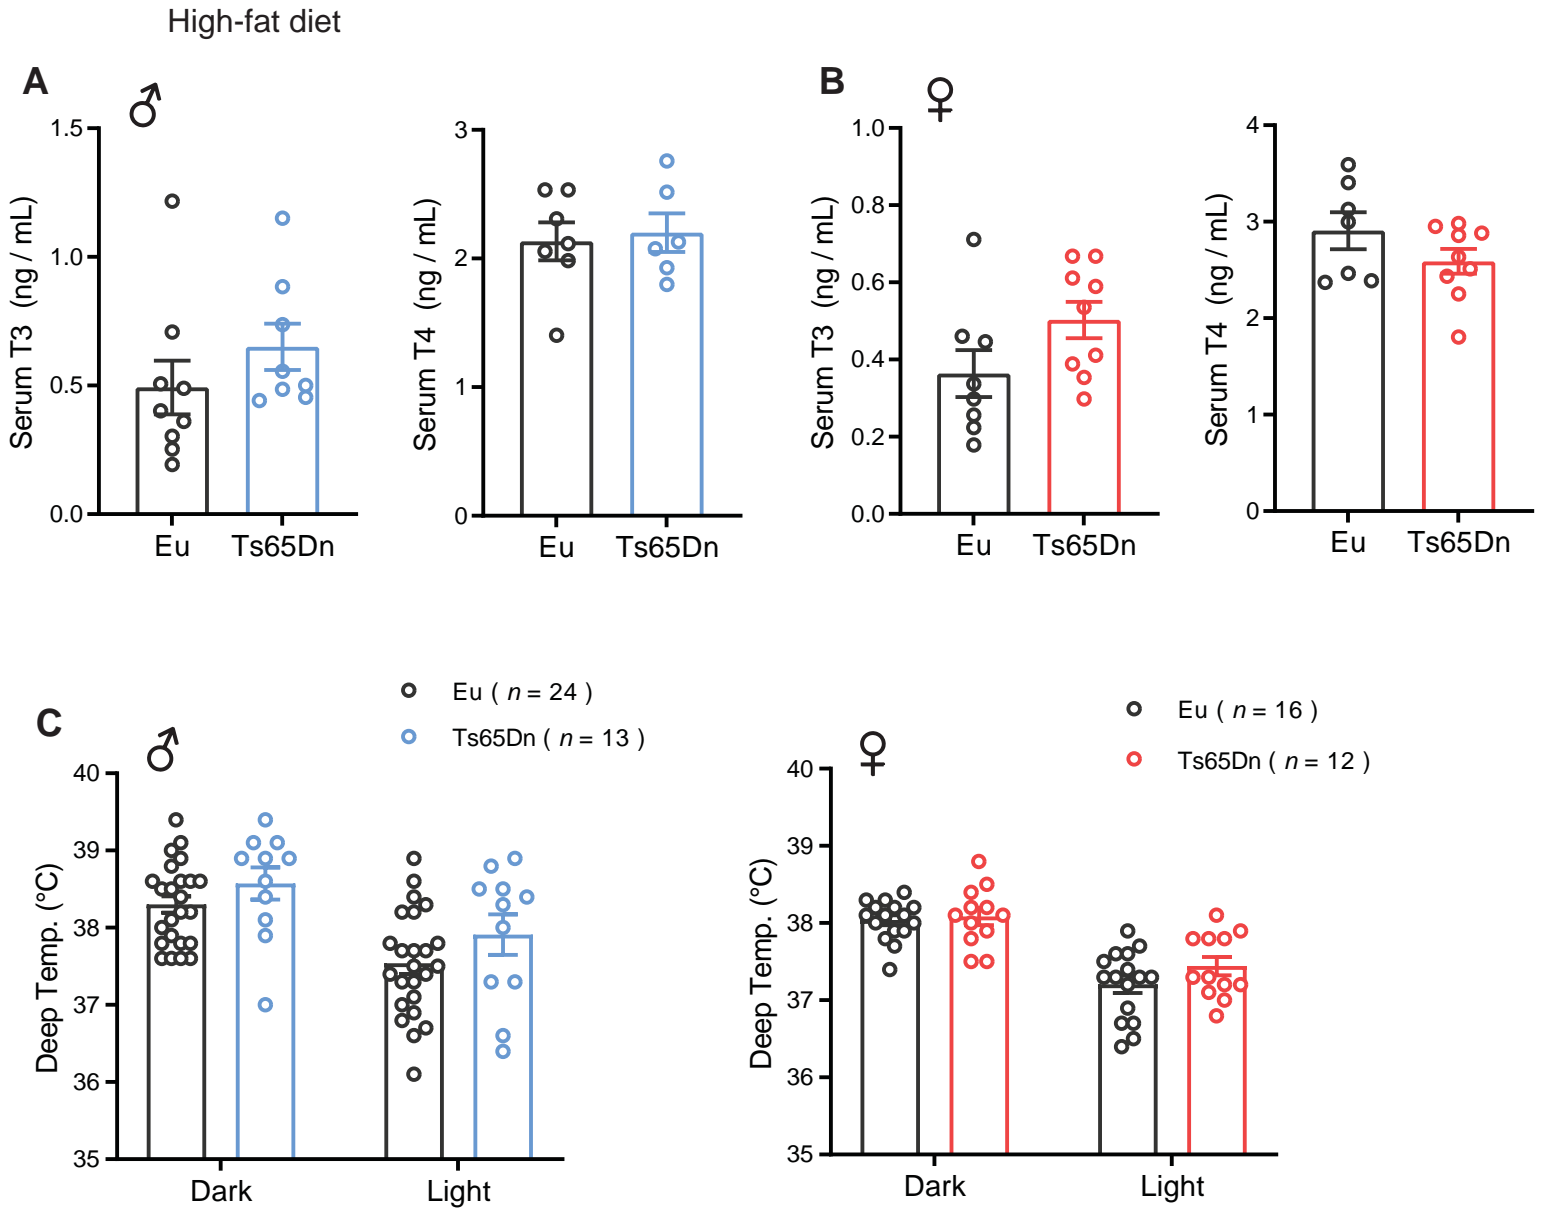

**Figure S6. Serum T3 and T4, and body temperature in HFD-fed Ts65Dn mice.** A-B) Serum T3 and T4 in male (A) and female (B) Ts65Dn and euploid mice. Sample size for male (Eu,  $n = 7-9$ ; Ts65Dn,  $n = 6-8$ ) and female (Eu,  $n = 7-8$ ; Ts65Dn,  $n = 9$ ). C-D) Deep colonic temperature in male (C) and female (D) Ts65Dn and euploid mice in the dark and light cycle. Sample size for male (Eu,  $n = 24$ ; Ts65Dn,  $n = 13$ ) and female (Eu,  $n = 16$ ; Ts65Dn,  $n = 12$ ) mice. All data are presented as mean  $\pm$  SEM.

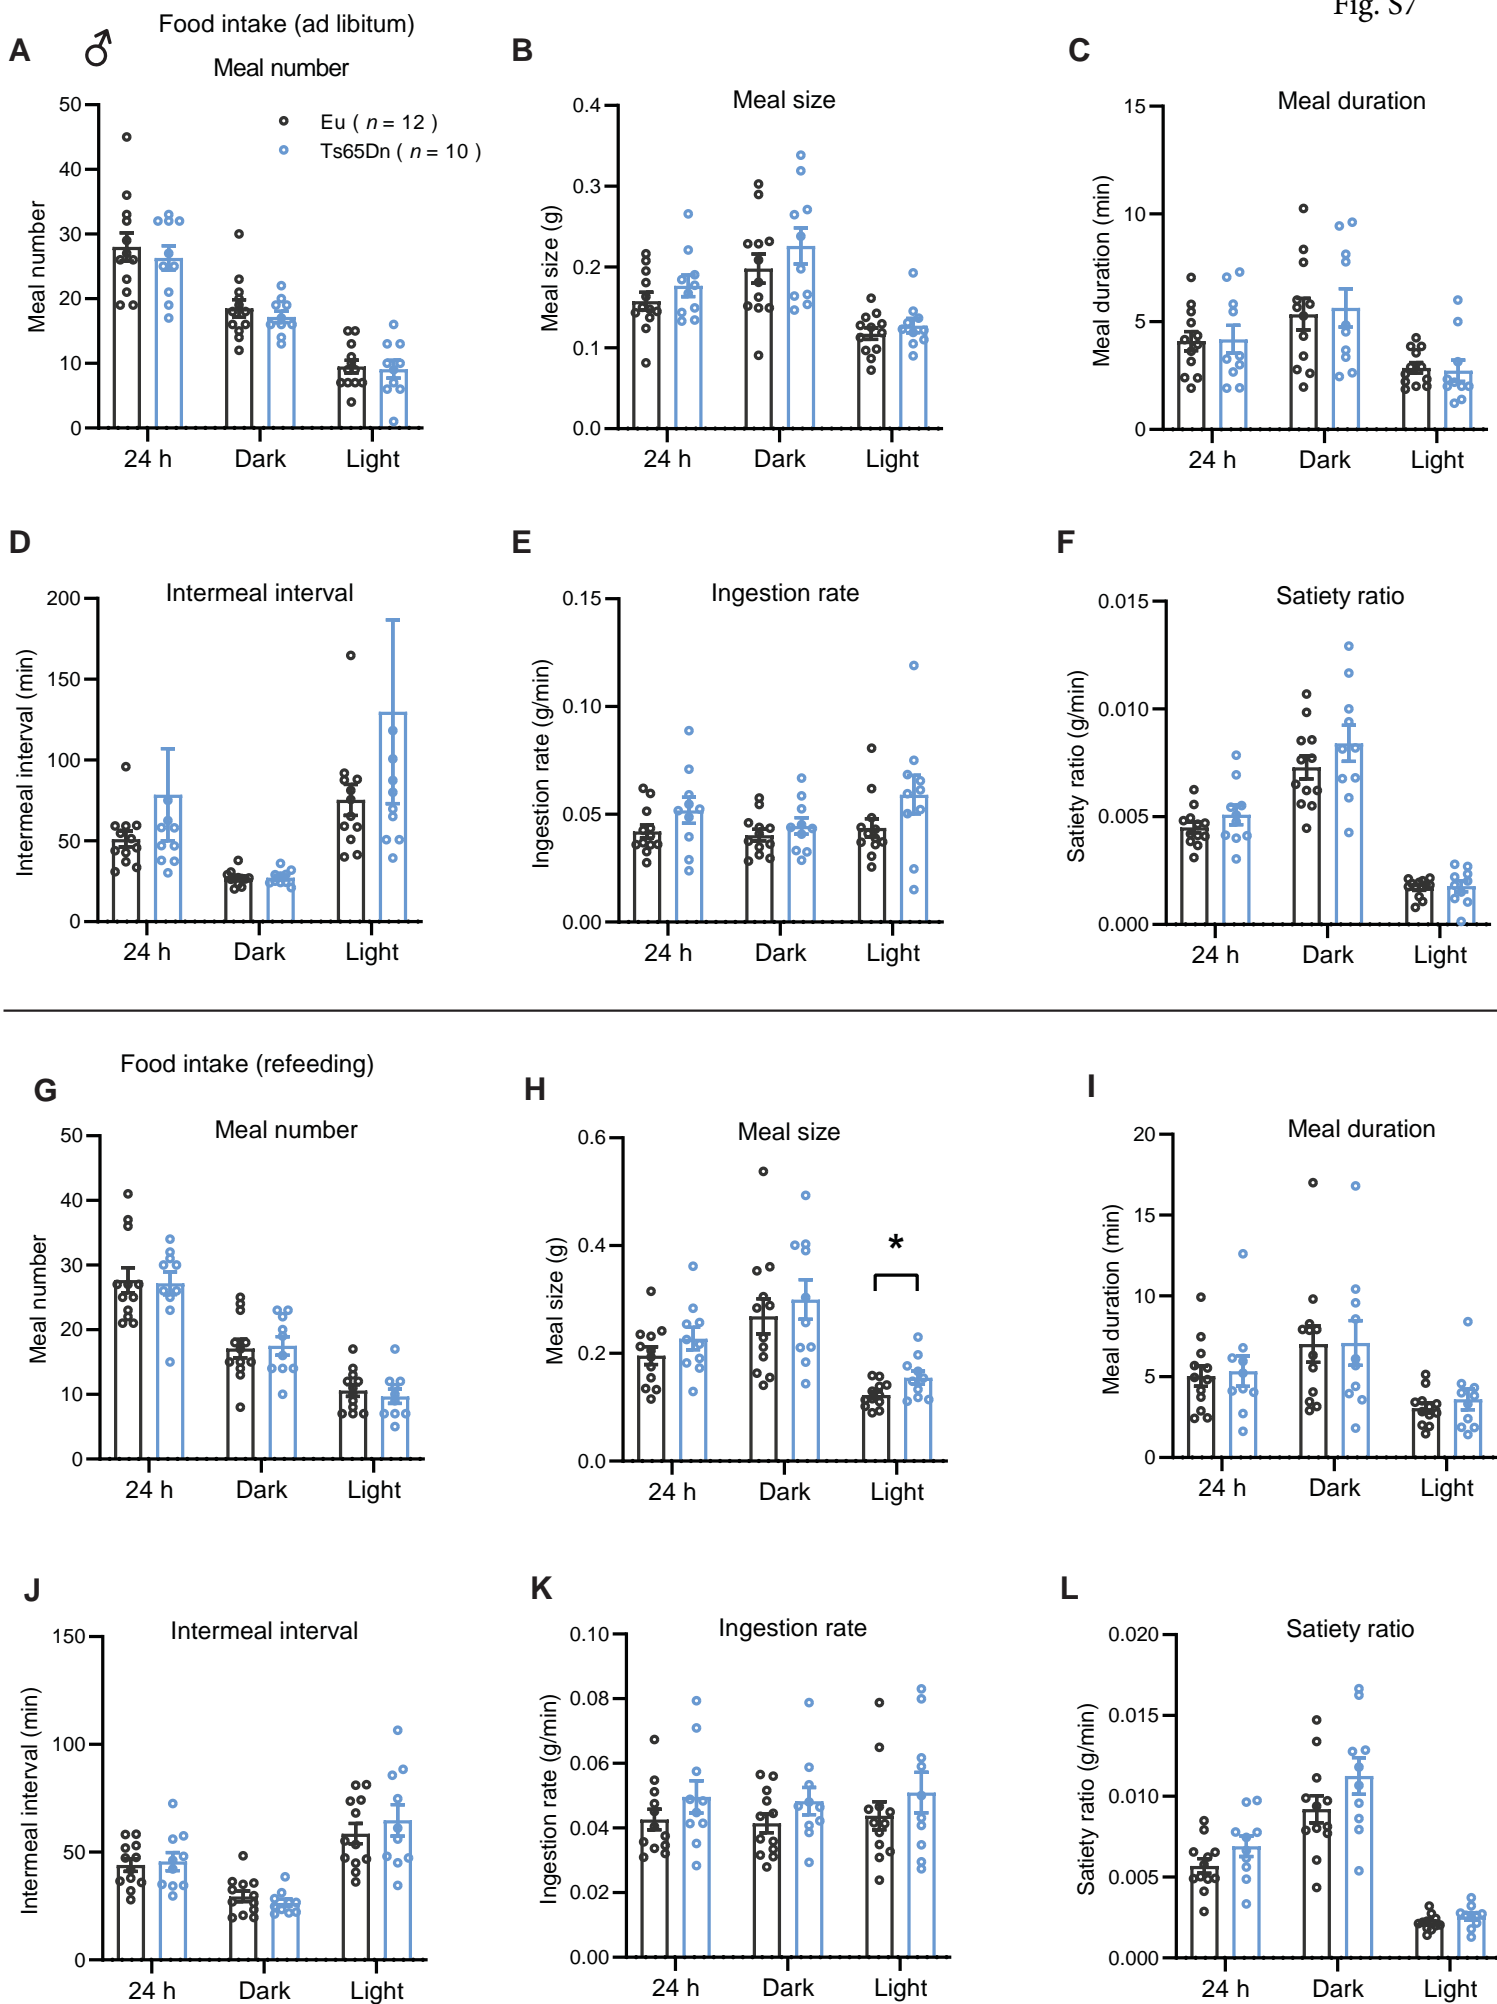

**Figure S7. Food intake pattern analysis in ad libitum fed and fasted-refed Ts65Dn male mice on a high-fat diet.** A-F) Meal number (A), meal size (B), meal duration (C), intermeal interval (D), ingestion rate (E), and satiety ratio (F) in male Ts65Dn and euploid mice during a 24-hr ad libitum fed period, with the light cycle, dark cycle, and 24-hr cumulative data presented. G-L) Meal number (G), meal size (H), meal duration (I), intermeal interval (J), ingestion rate (K), and satiety ratio (L) in male Ts65Dn and euploid mice during a 24-hr refeeding period after a fast, with the light cycle, dark cycle, and 24-hr cumulative data presented. All data are presented as mean  $\pm$  SEM. \*  $P < 0.05$

## Food intake (Ad libitum)

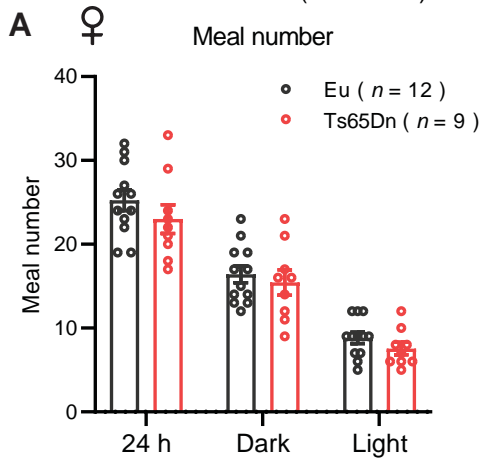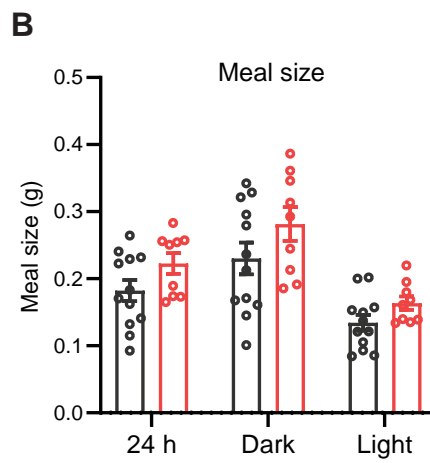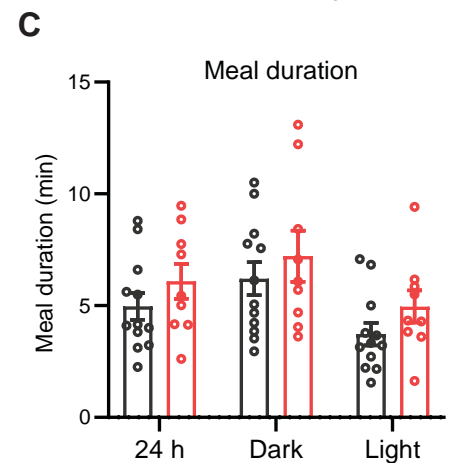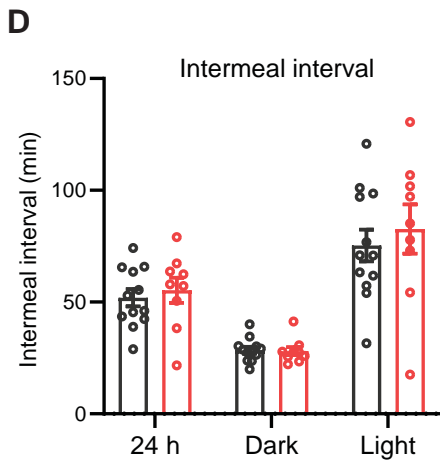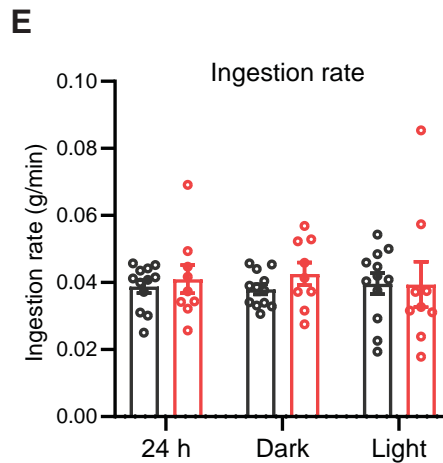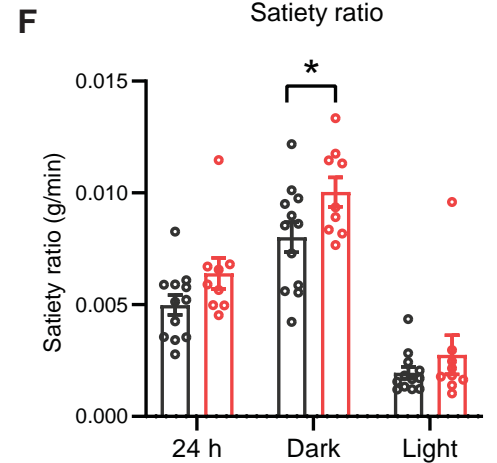

## Food intake (refeeding)

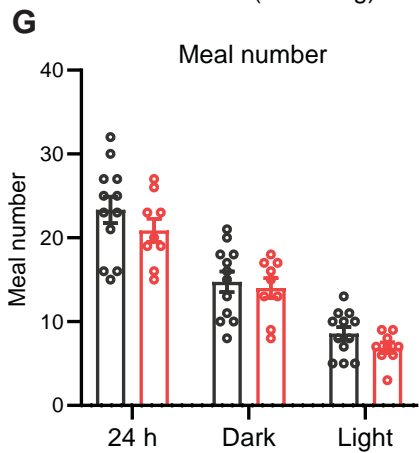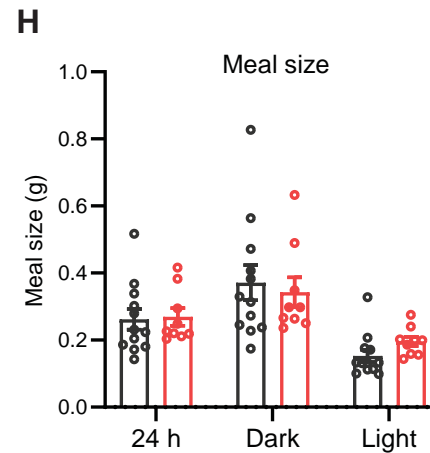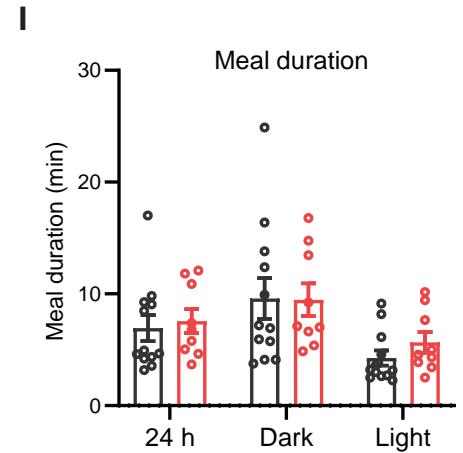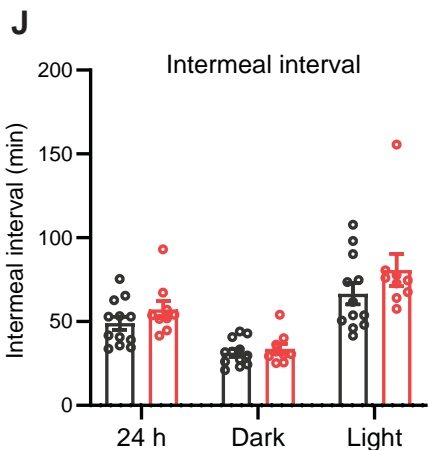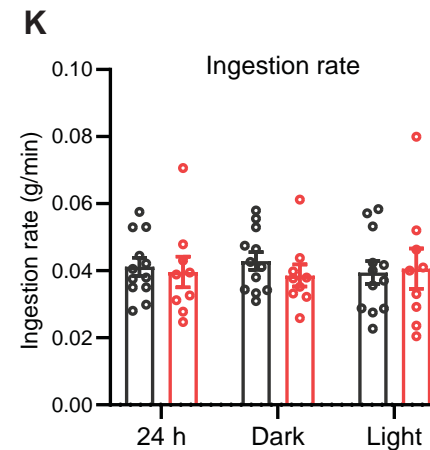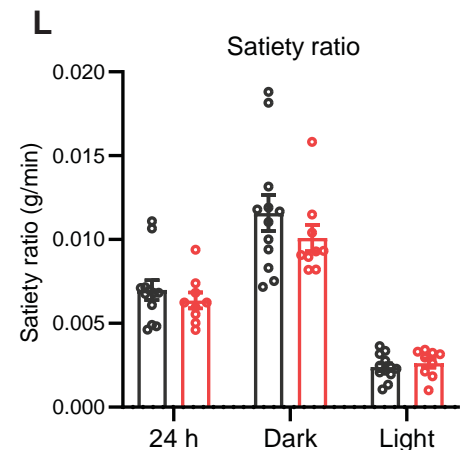

**Figure S8. Food intake pattern analysis in ad libitum fed and fasted-refed Ts65Dn female mice on a high-fat diet.** A-F) Meal number (A), meal size (B), meal duration (C), intermeal interval (D), ingestion rate (E), and satiety ratio (F) in female Ts65Dn and euploid mice during a 24-hr ad libitum fed period, with the light cycle, dark cycle, and 24-hr cumulative data presented. G-L) Meal number (G), meal size (H), meal duration (I), intermeal interval (J), ingestion rate (K), and satiety ratio (L) in female Ts65Dn and euploid mice during a 24-hr refeeding period after a fast, with the light cycle, dark cycle, and 24-hr cumulative data presented. All data are presented as mean  $\pm$  SEM.



Fig. S9

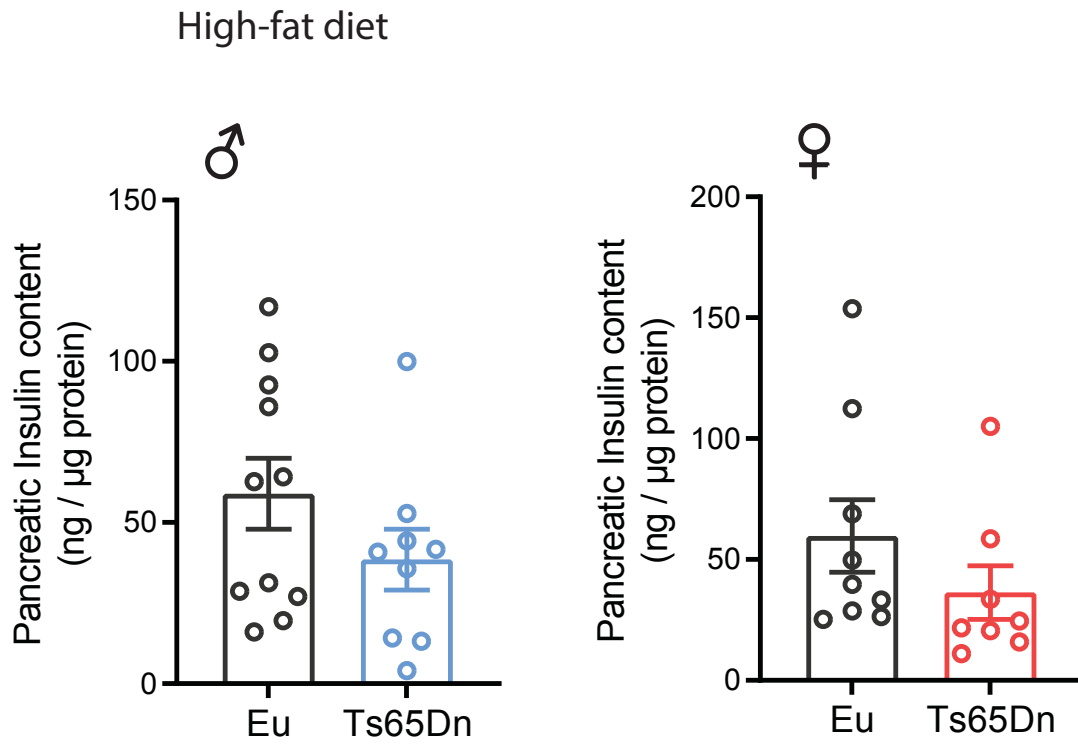

**Figure S9. Pancreatic insulin content of Ts65Dn and euploid mice on a high-fat diet.** A-B) Pancreatic insulin content in male (A) and female (B) Ts65Dn and euploid mice fed a high-fat diet. Sample size for male (Eu,  $n = 11$ ; Ts65Dn,  $n = 9$ ) and female (Eu,  $n = 9$ ; Ts65Dn,  $n = 8$ ) mice. All data are presented as mean  $\pm$  SEM.

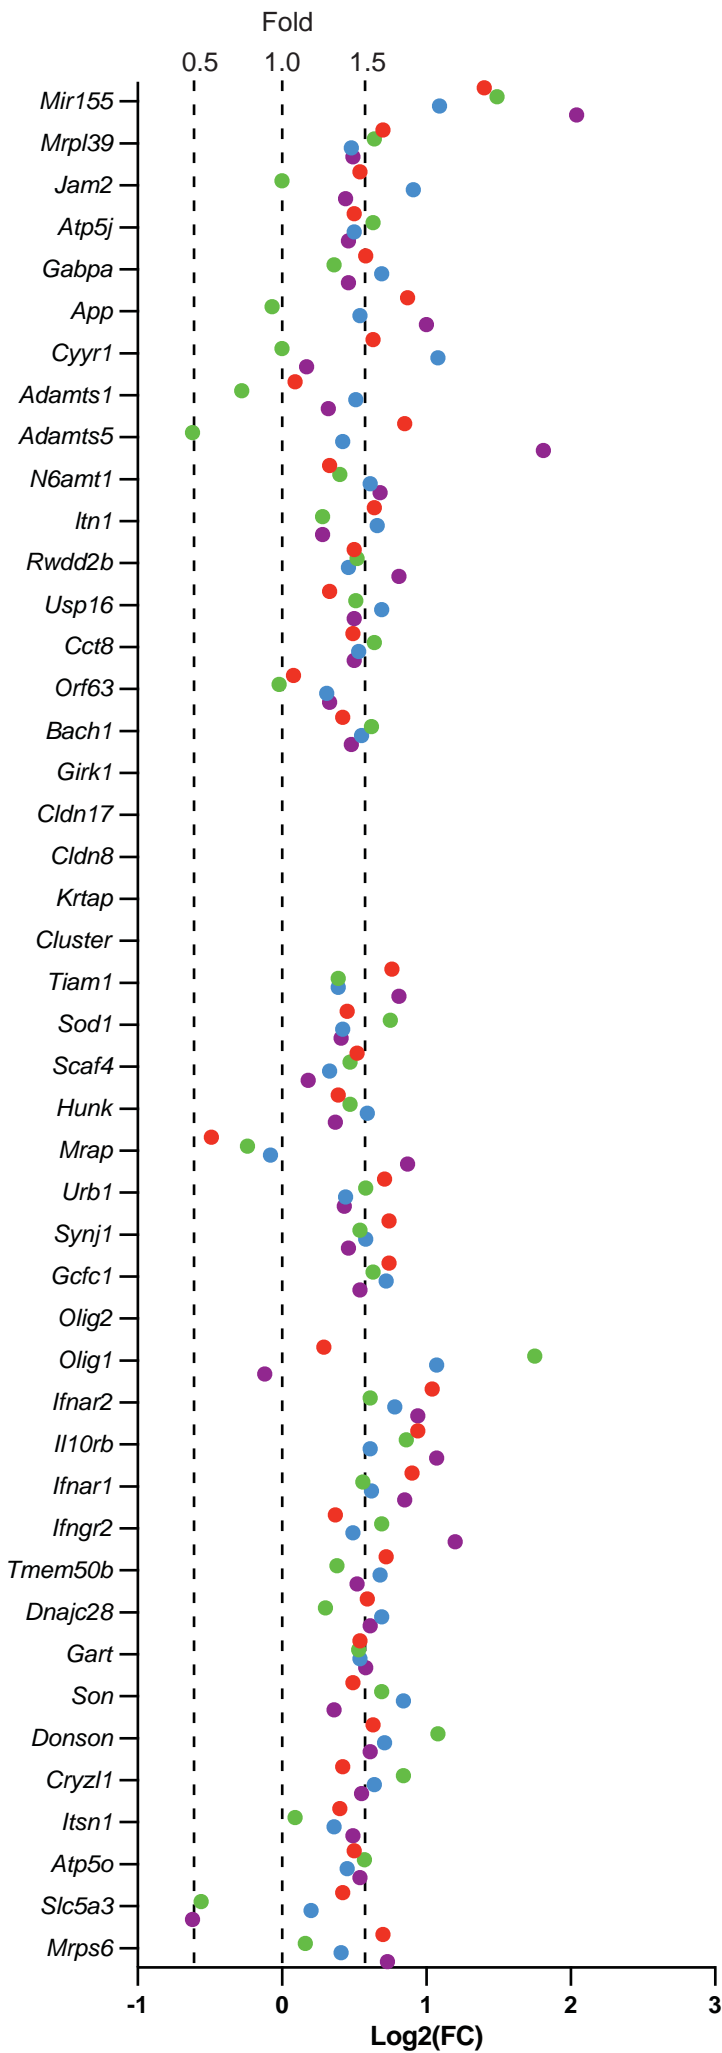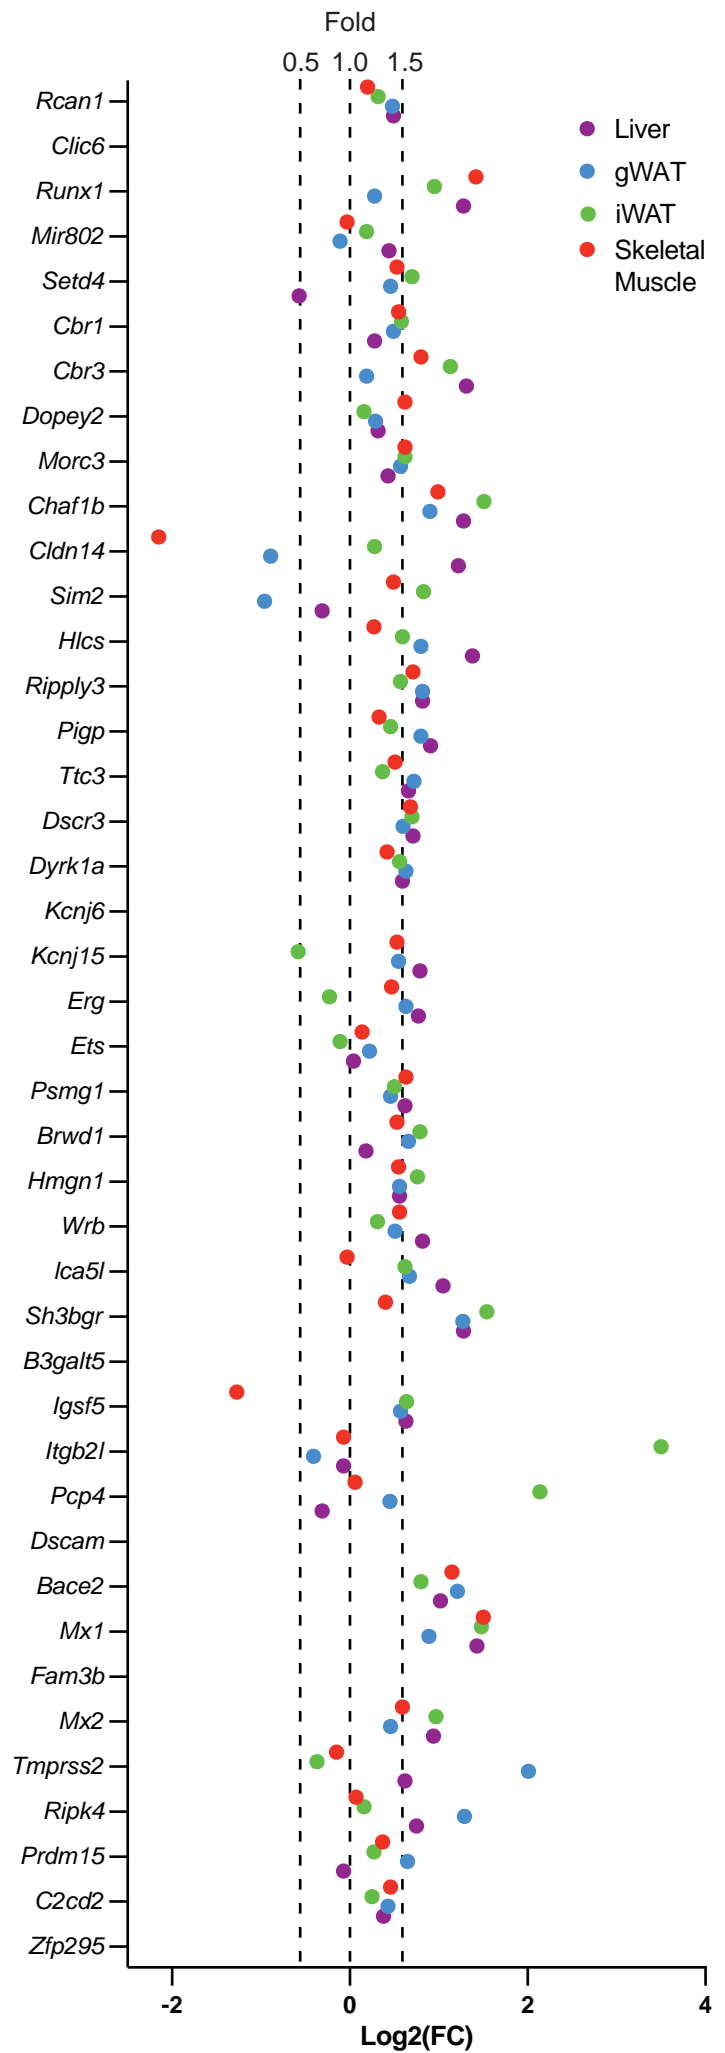

**Figure S10. Expression of orthologous trisomic genes across tissues in Ts65Dn male mice.** Shown are the average expression value for all the orthologous 89 trisomic genes (excluding the *Krtap* gene cluster, of which none were detected) in the liver, gonadal white adipose tissue (gWAT), inguinal white adipose tissue (iWAT), and skeletal muscle of male Ts65Dn mice fed a high-fat diet. The expression of 12 genes (*Girk1*, *Cldn17*, *Cldn8*, *Olig2*, *Kcne2*, *Kcne1*, *Clic6*, *Kcnj6*, *B3galt5*, *Dscam*, *Fam3b*, *zfp295*) and the *Krtap* cluster genes were not detected by RNA-seq. The three dashed lines indicate fold expression value of 0.5, 1, and 1.5. Relative to the gene expression level in euploid, most of the trisomic genes have an average expression level close to the expected 1.5-fold due to increased gene dosage.

Fig. S11

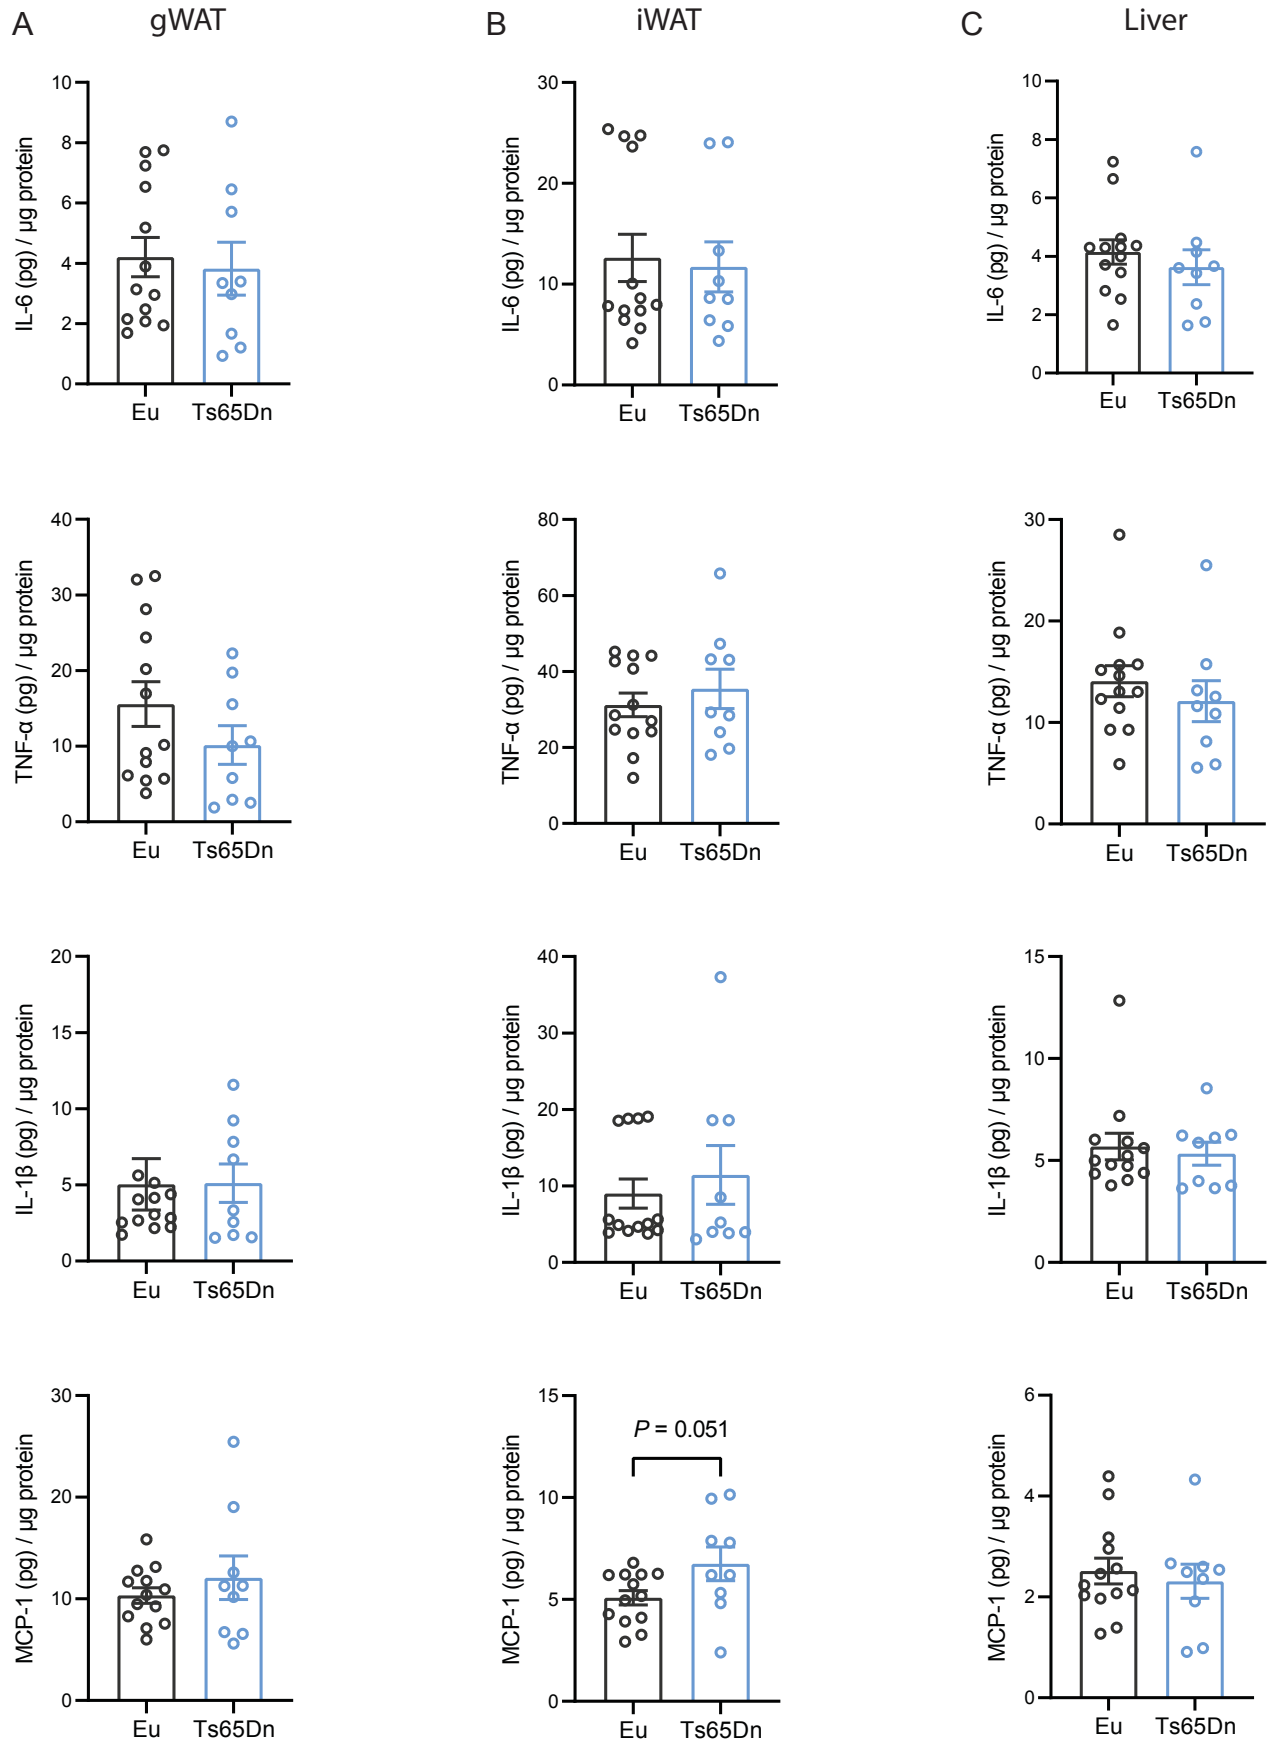

**Figure S11. Inflammatory cytokine levels in gWAT, iWAT, and liver were largely not different between Ts65Dn and euploid male mice fed a high-fat diet.** (A-C) ELISA measurements of IL-1 $\beta$ , IL-6, TNF- $\alpha$ , and MCP-1 levels in gWAT (A), iWAT (B), and liver (C) of Ts65Dn and euploid male mice fed a high-fat diet. gWAT, gonadal white adipose tissue; iWAT, inguinal white adipose tissue.

Euploid,  $n = 13$ ; Ts65Dn,  $n = 9$

Fig. S12

Inguinal White Adipose Tissue (iWAT)

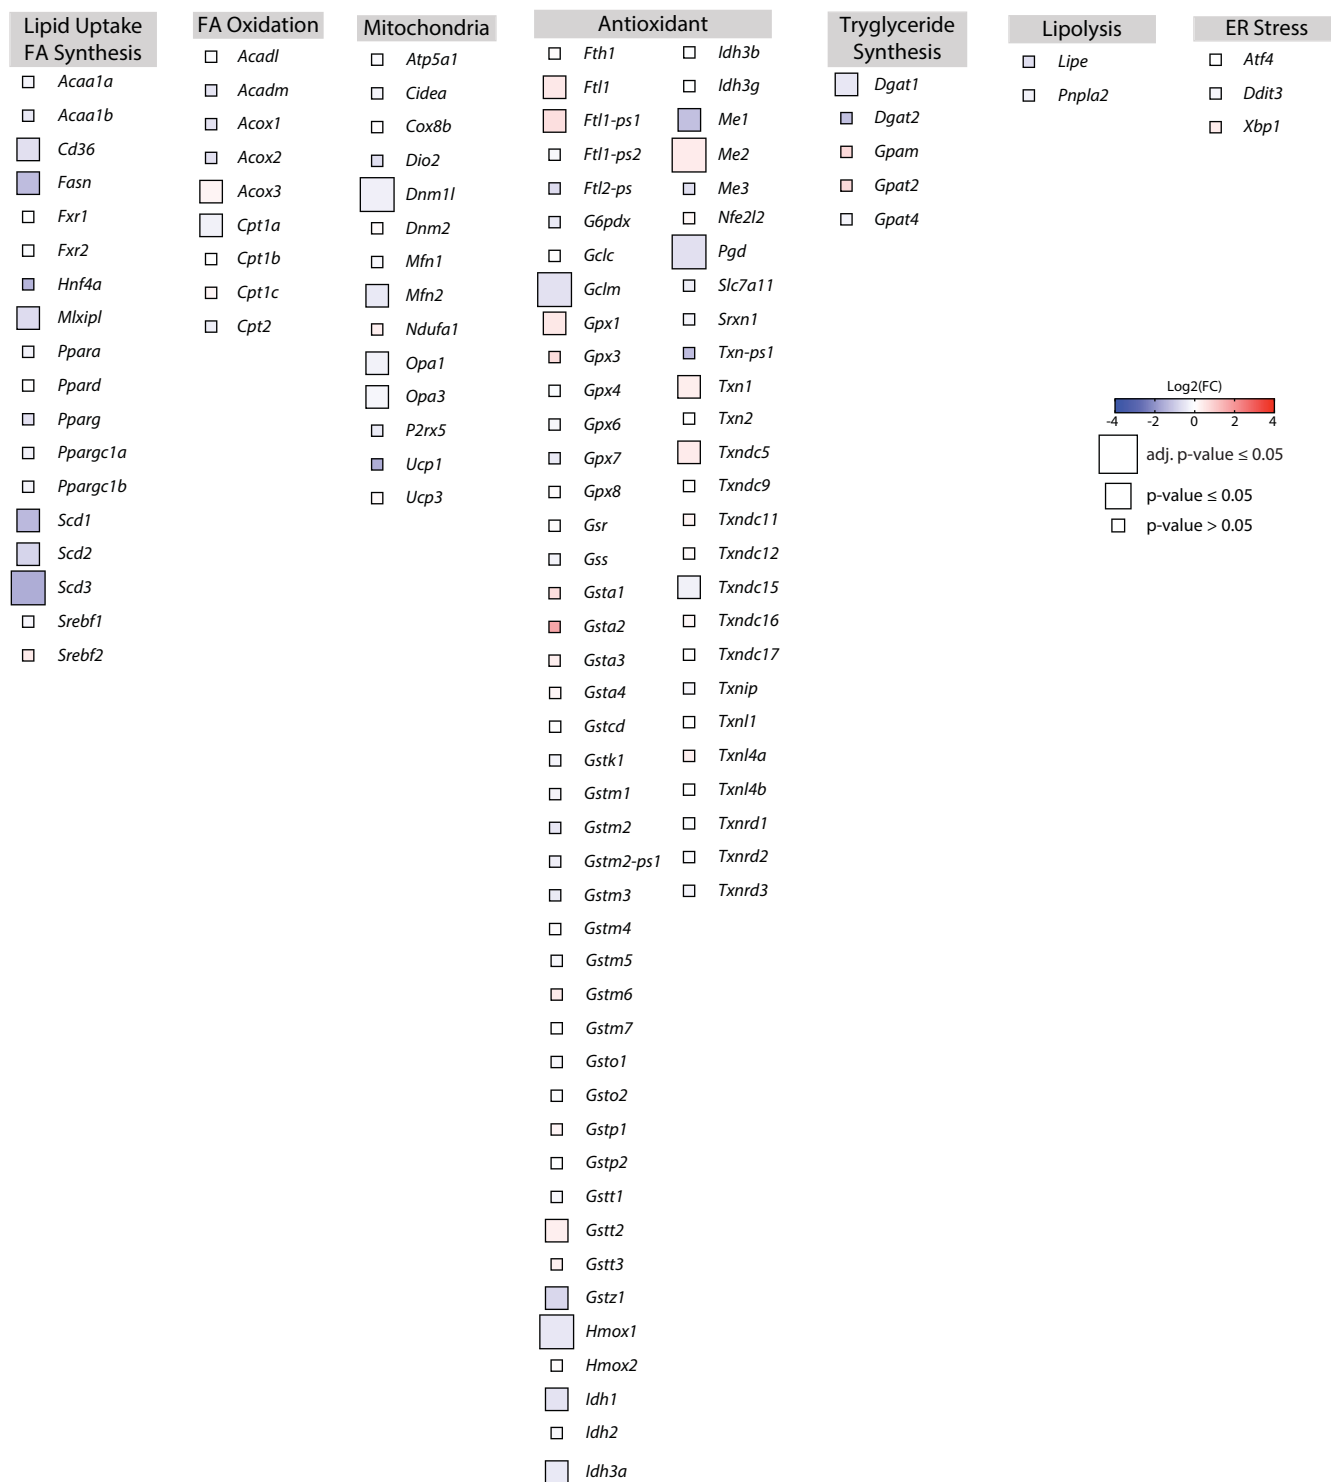

**Figure S12. Expression of metabolic, mitochondrial, ER stress, and antioxidant genes in the inguinal white adipose tissue (iWAT) of Ts65Dn and euploid male mice on a high-fat diet.** Heat maps of genes associated with lipid uptake and synthesis, fatty acid (FA) oxidation, mitochondrial dynamics and function, antioxidant, triglyceride synthesis, lipolysis, and endoplasmic reticulum (ER) stress in the iWAT of Ts65Dn and euploid male mice fed a high-fat diet. The size of the box indicates statistical significance in gene expression between male Ts65Dn mice relative to euploid controls. Full-size box denotes significantly different expression (adjusted  $p$ -value  $\leq 0.05$ ), medium size box denotes significantly different expression (non-adjusted  $p$ -value  $\leq 0.05$ ), and small box size denotes non-significant expression between genotypes ( $p$ -value  $> 0.05$ ). The color gradient indicates  $\text{Log}_2$  fold-change (FC) of each gene in Ts65Dn relative to euploid controls, with up-regulated genes in the red and down-regulated genes in the blue color spectrum. Tissue sample size for iWAT RNA sequencing (Euploid,  $n = 6$ ; Ts65Dn,  $n = 6$ ).



Fig. S13

A

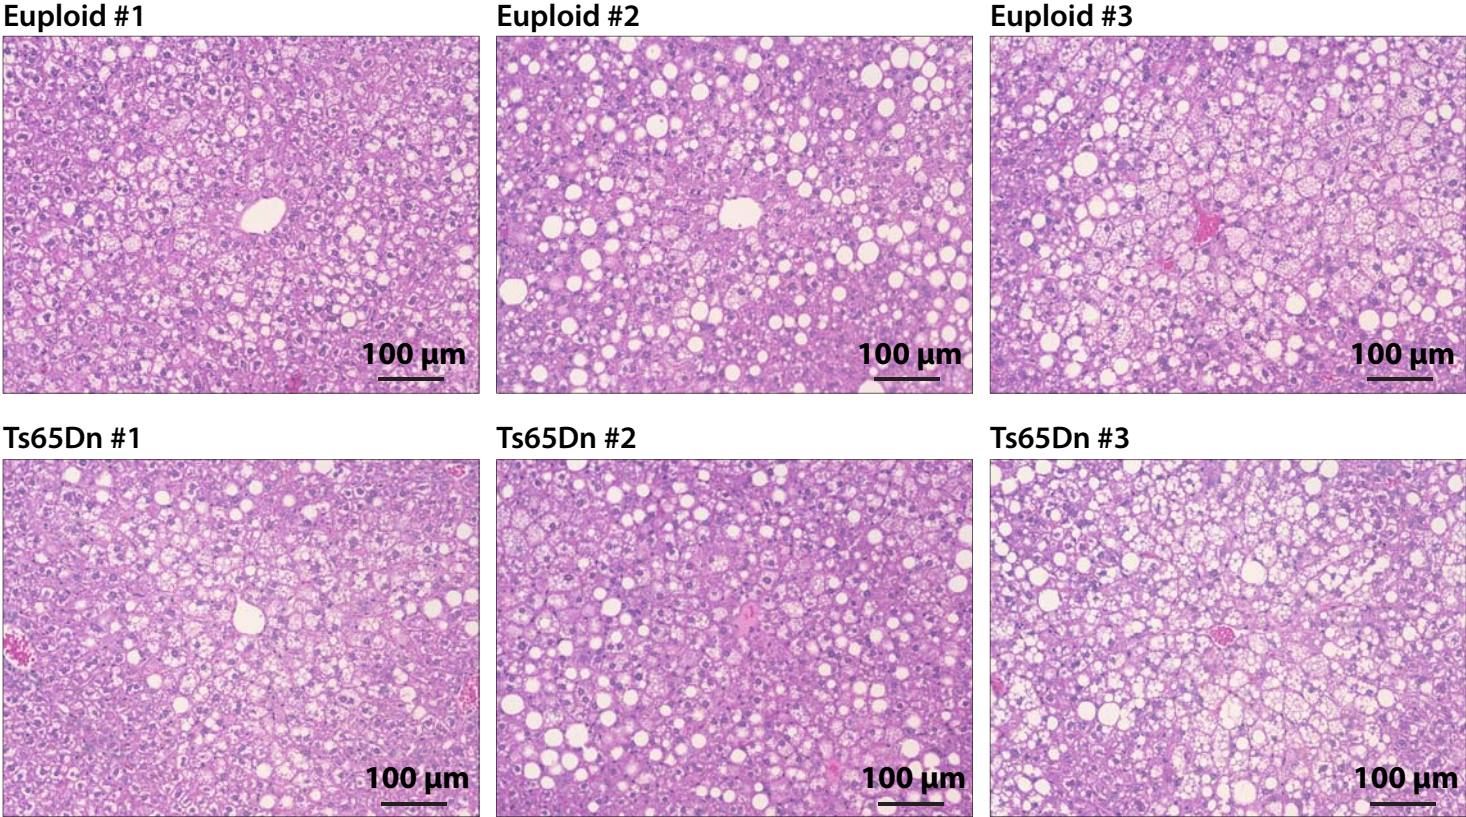

B

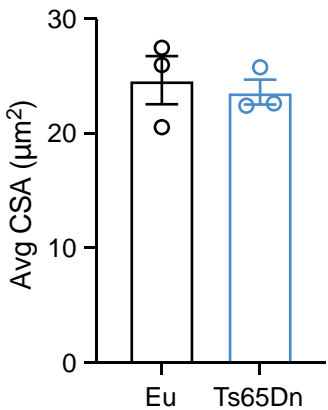

C

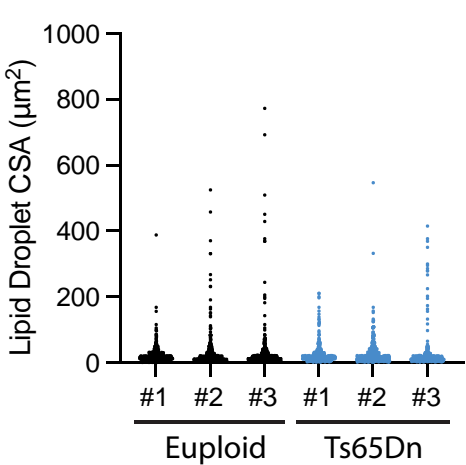

D

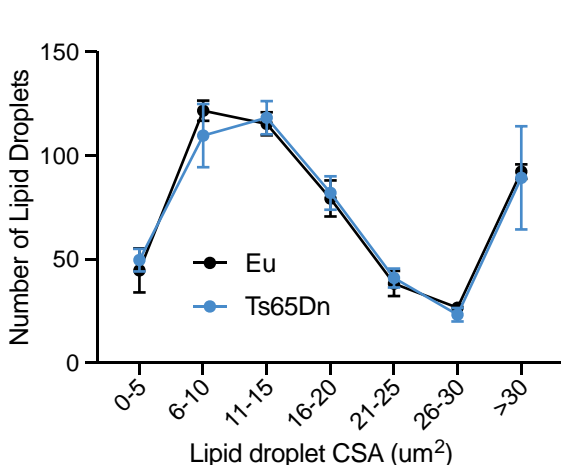

**Figure S13. Hepatic lipid droplet size was not significantly different between HFD-fed Ts65Dn and euploid male mice on a high-fat diet.** (A) Three randomly selected 20X images (200X magnification) of euploid and Ts65Dn mouse liver sections were used for quantification. (B) Average cross-sectional area (CSA) of lipid droplets was quantified. At least 500 lipid droplets were quantified per image. (C) Lipid droplet CSA spread by sample ( $n = 3$  per genotype; minimum 500 lipid droplets per sample). (D) Lipid droplet CSA distribution.

## Liver

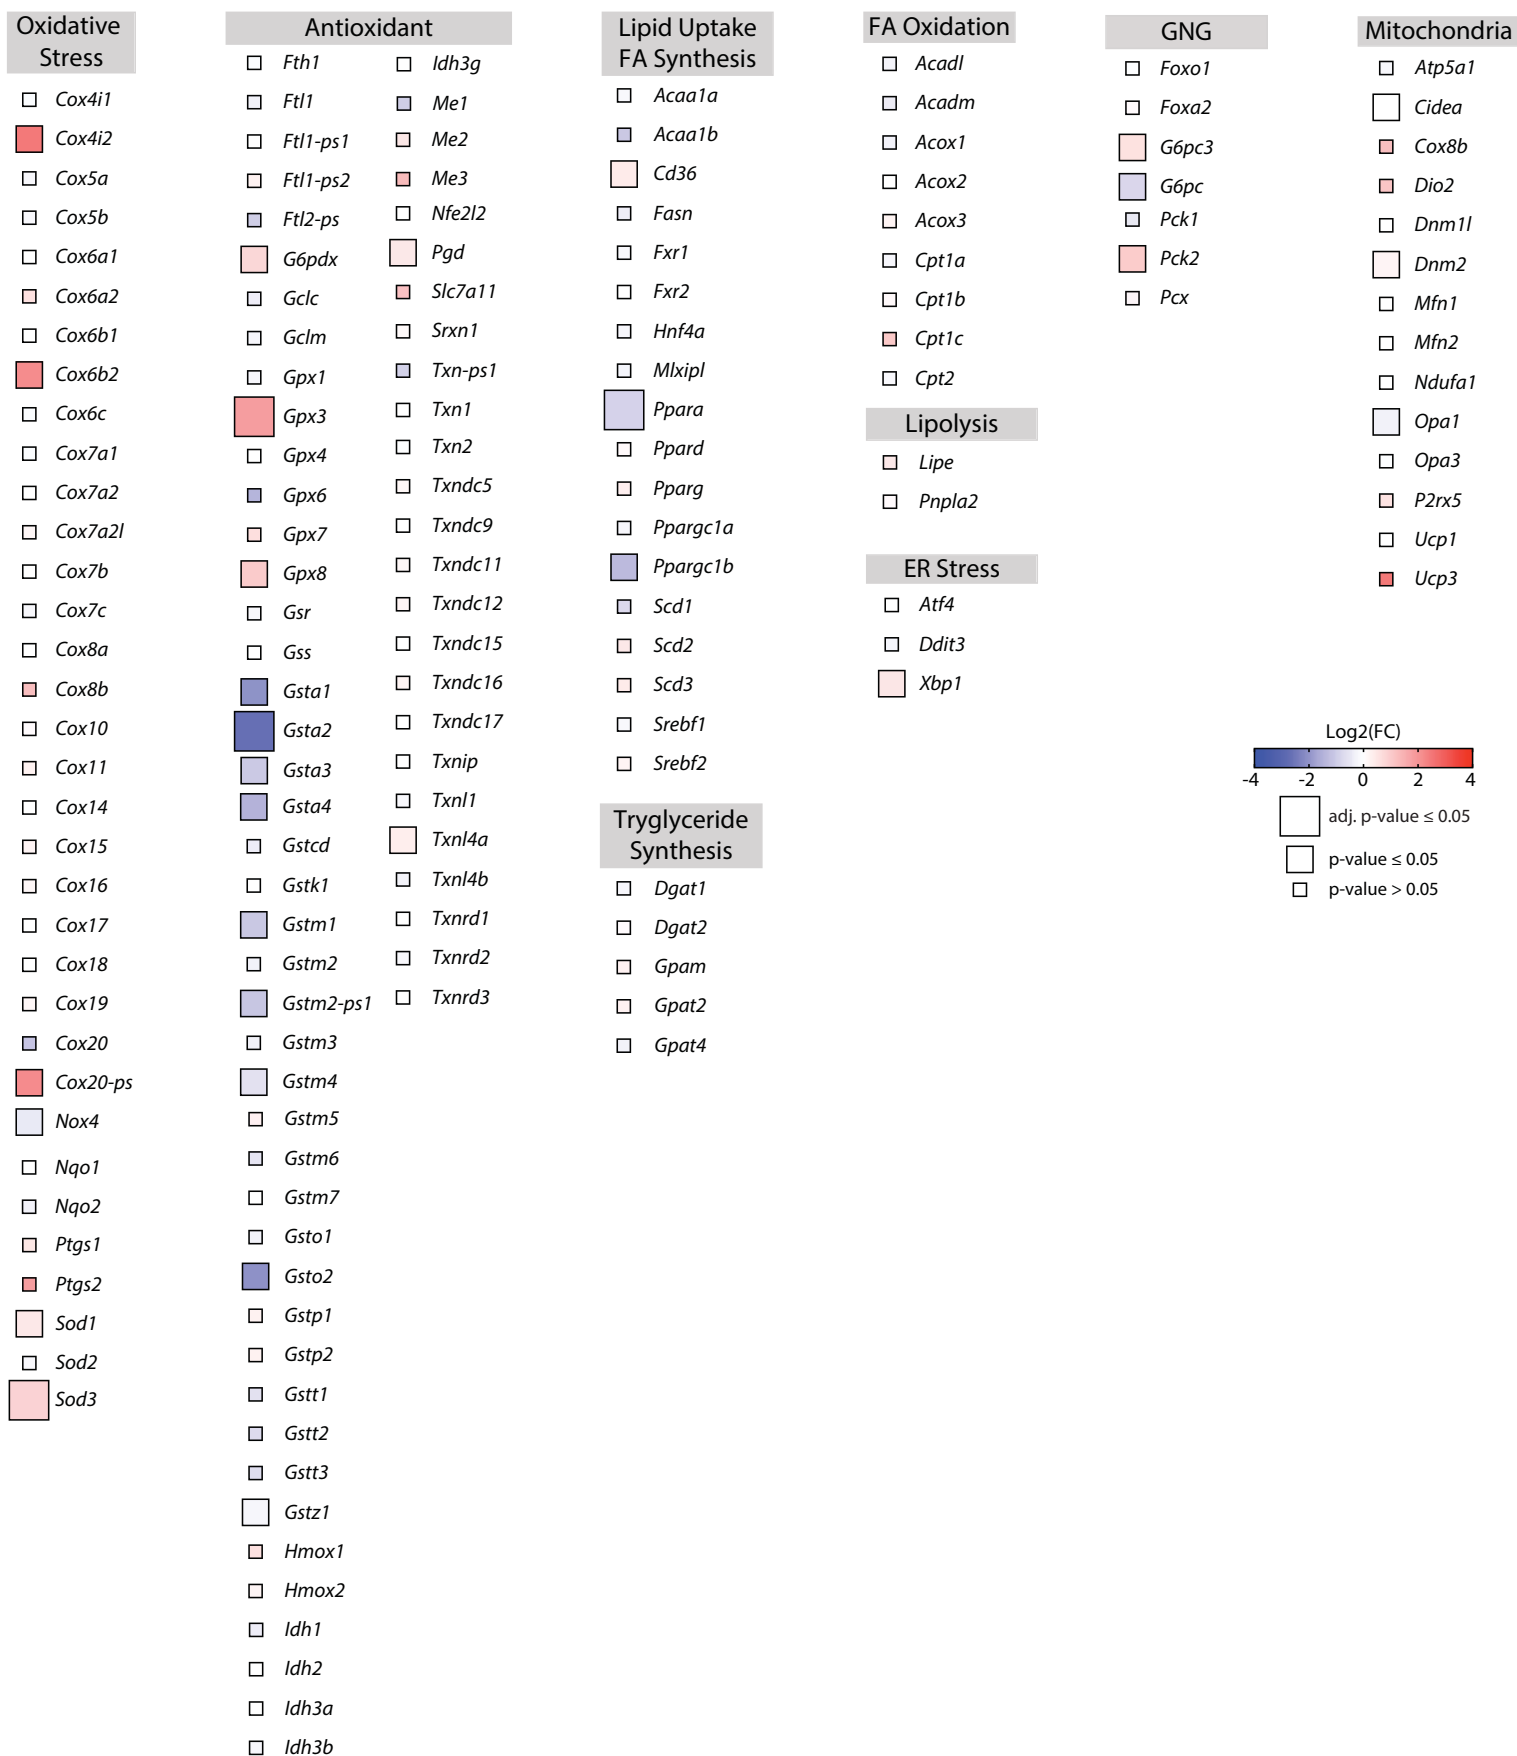

**Figure S14. Expression of metabolic, mitochondrial, oxidative stress, ER stress, and antioxidant genes in the liver of Ts65Dn and euploid mice on a high-fat diet.** Heat maps of genes associated with oxidative stress, antioxidant, lipid uptake and synthesis, triglyceride synthesis, fatty acid (FA) oxidation, lipolysis, endoplasmic reticulum (ER) stress, gluconeogenesis (GNG), and mitochondrial dynamics and function in the liver of Ts65Dn and euploid male mice fed a high-fat diet. The size of the box indicates statistical significance in gene expression between male Ts65Dn mice relative to euploid controls. Full-size box denotes significantly different expression (adjusted  $p$ -value  $\leq 0.05$ ), medium size box denotes significantly different expression (non-adjusted  $p$ -value  $\leq 0.05$ ), and small box size denotes non-significant expression between genotypes ( $p$ -value  $> 0.05$ ). The color gradient indicates  $\text{Log}_2$  fold-change (FC) of each gene in Ts65Dn relative to euploid controls, with up-regulated genes in the red and down-regulated genes in the blue color spectrum. Tissue sample size for liver RNA sequencing (Euploid,  $n = 6$ ; Ts65Dn,  $n = 6$ ).

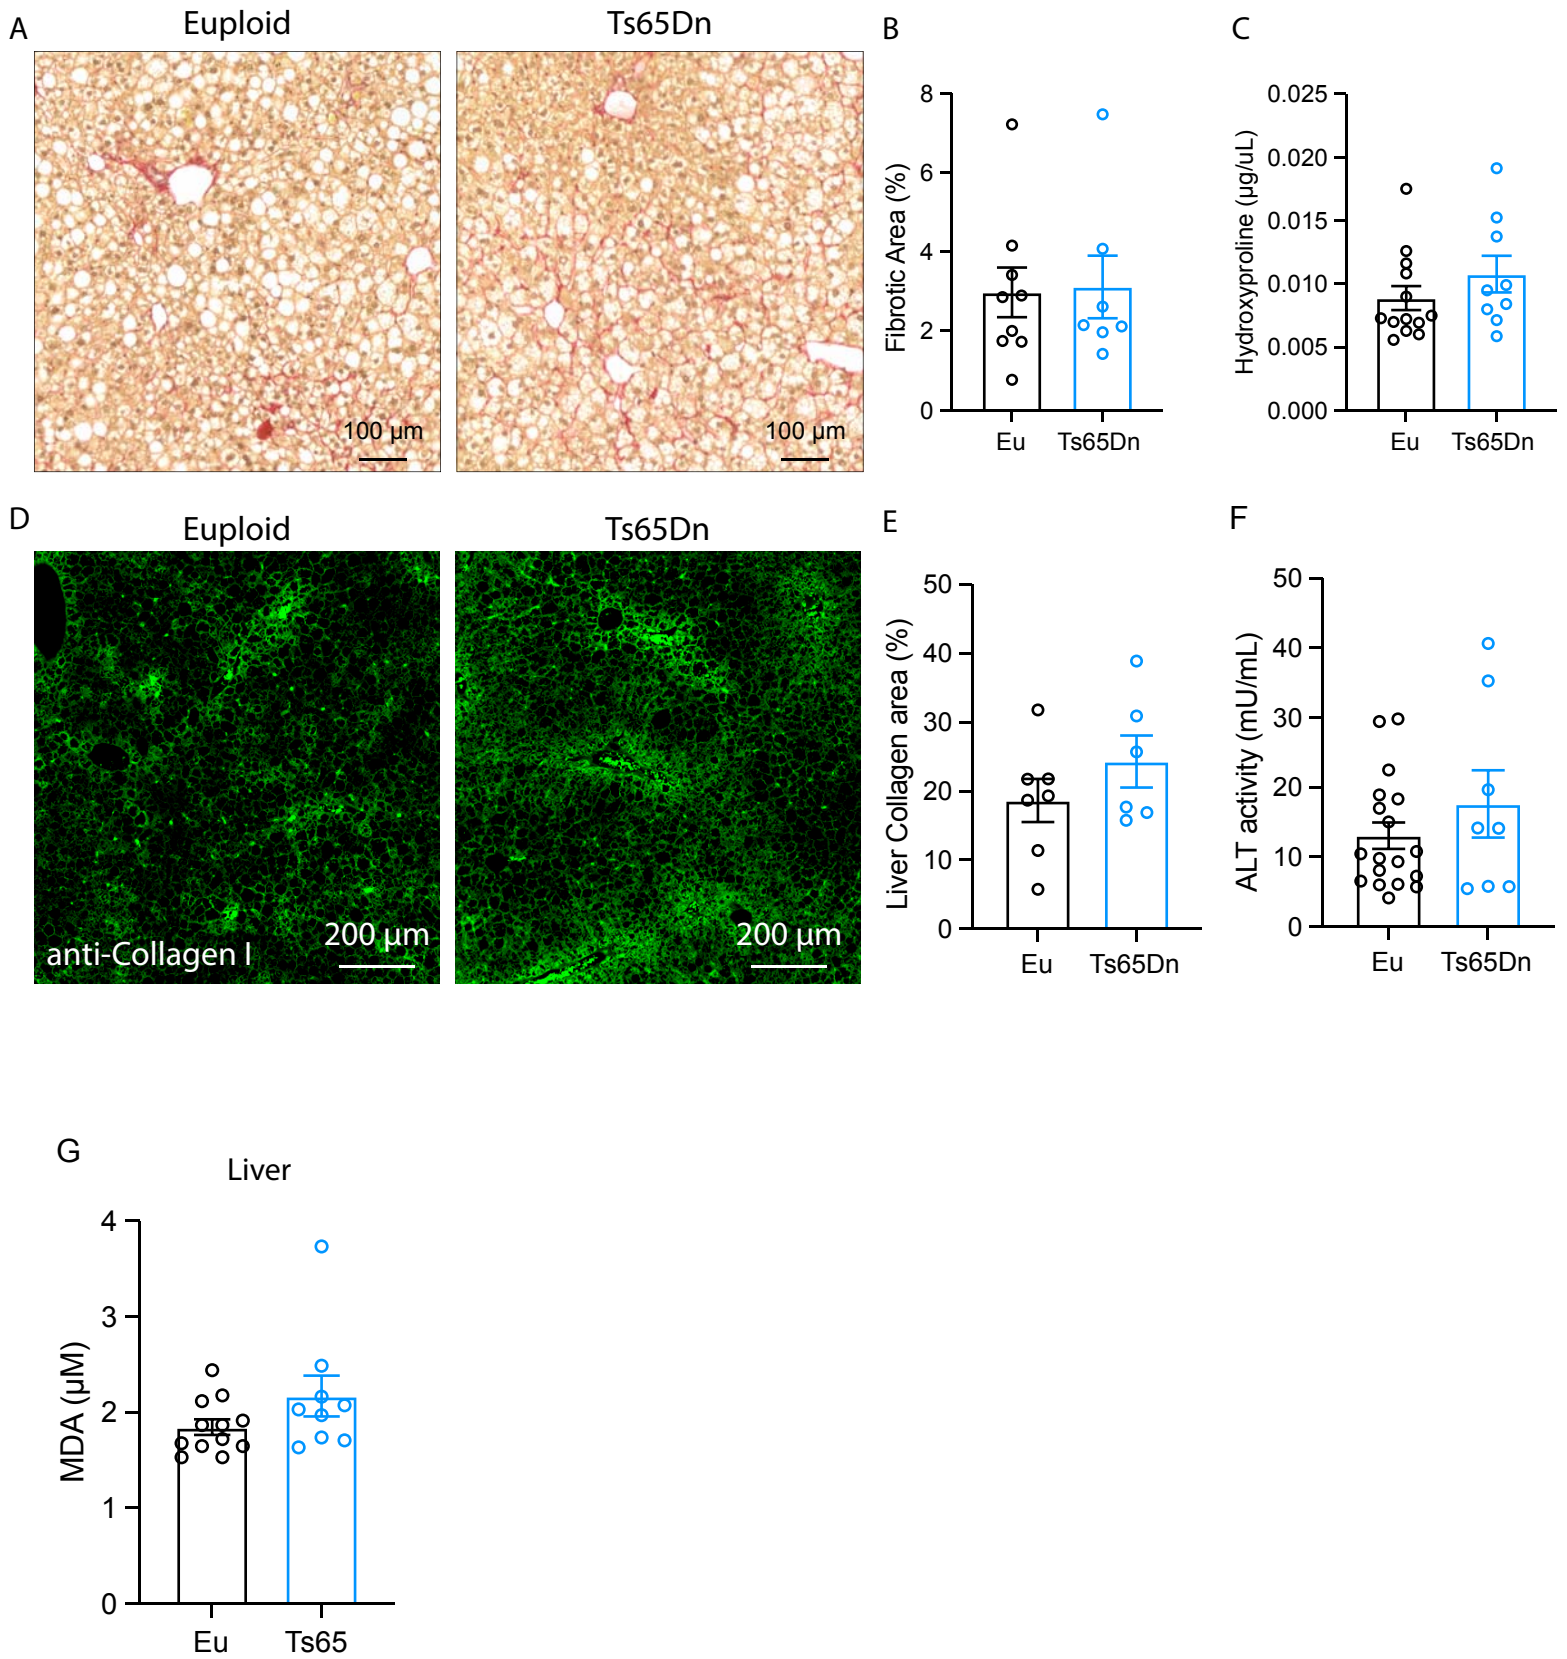

**Figure S15. Protein markers of fibrosis, oxidative stress, and liver damage were not significantly different between Ts65Dn and euploid male mice on a high-fat diet.** (A) Representative Sirius red-stained liver sections of Ts65Dn and euploid mice. (B) Quantification of % fibrotic area in the liver sections of Ts65Dn ( $n = 7$ ) and euploid ( $n = 9$ ) mice based on Sirius red staining. (C) Quantification of hydroxyproline levels in the liver of Ts65Dn ( $n = 9$ ) and euploid ( $n = 13$ ) mice. (D) Representative images of immunofluorescent staining of fibrotic collagen type I in the liver sections of Ts65Dn and euploid mice. (E) Quantification of total fluorescence (collagen type I positive) area as a percent of total liver area in Ts65Dn ( $n = 6$ ) and euploid ( $n = 7$ ) mice. (F) Quantification of serum alanine transaminase (ALT) levels, a marker of inflammation and liver damage, in Ts65Dn ( $n = 8$ ) and euploid ( $n = 18$ ) mice. (G) Quantification of malondialdehyde (MDA) levels (a marker of lipid peroxidation and oxidative stress) in Ts65Dn ( $n = 9$ ) and euploid ( $n = 12$ ) mice.

Table S1

| Variable               | Male          |               |                   | Female        |               |              |
|------------------------|---------------|---------------|-------------------|---------------|---------------|--------------|
|                        | Euploid       | Ts65Dn        | <i>P</i>          | Euploid       | Ts65Dn        | <i>P</i>     |
| N                      | 13            | 9             |                   | 10            | 9             |              |
| Body weight (g)        | 54.26 ± 1.43  | 44.26 ± 2.59  | <b>0.001</b>      | 54.48 ± 2.16  | 50.66 ± 1.28  | 0.158        |
| gonadal fat (gWAT, g)  | 0.699 ± 0.070 | 0.491 ± 0.052 | <b>0.049</b>      | 2.895 ± 0.244 | 3.049 ± 0.242 | 0.661        |
| % gWAT                 | 1.287 ± 0.113 | 1.163 ± 0.134 | 0.496             | 5.28 ± 0.36   | 6.00 ± 0.42   | 0.216        |
| inguinal fat (iWAT, g) | 1.373 ± 0.071 | 0.774 ± 0.103 | <b>&lt;0.0001</b> | 1.742 ± 0.168 | 1.116 ± 0.044 | <b>0.003</b> |
| % iWAT                 | 2.532 ± 0.111 | 1.688 ± 0.177 | <b>0.0004</b>     | 3.18 ± 0.26   | 2.20 ± 0.09   | <b>0.003</b> |
| Liver (g)              | 2.352 ± 0.160 | 2.742 ± 0.350 | 0.275             | 1.455 ± 0.078 | 1.471 ± 0.105 | 0.903        |
| % Liver weight         | 4.335 ± 0.262 | 6.080 ± 0.547 | <b>0.004</b>      | 2.67 ± 0.11   | 2.90 ± 0.19   | 0.322        |
| Heart weight (g)       | 0.229 ± 0.031 | 0.208 ± 0.027 | 0.651             | 0.143 ± 0.007 | 0.157 ± 0.004 | 0.125        |
| % Heart weight         | 0.420 ± 0.053 | 0.471 ± 0.051 | 0.516             | 0.266 ± 0.017 | 0.312 ± 0.007 | <b>0.037</b> |
| Kidney weight (g)      | 0.257 ± 0.013 | 0.265 ± 0.017 | 0.718             | 0.187 ± 0.005 | 0.204 ± 0.009 | 0.121        |
| % Kidney weight        | 0.473 ± 0.016 | 0.607 ± 0.037 | <b>0.001</b>      | 0.348 ± 0.016 | 0.404 ± 0.014 | <b>0.021</b> |
| Pancreas weight (g)    | 0.453 ± 0.025 | 0.463 ± 0.064 | 0.878             | 0.343 ± 0.038 | 0.488 ± 0.040 | <b>0.017</b> |
| % Pancreas weight      | 0.835 ± 0.037 | 1.041 ± 0.120 | 0.074             | 0.647 ± 0.084 | 0.966 ± 0.078 | <b>0.013</b> |
| Spleen weight (g)      | 0.154 ± 0.011 | 0.227 ± 0.022 | <b>0.004</b>      | 0.120 ± 0.013 | 0.183 ± 0.018 | <b>0.013</b> |
| % Spleen weight        | 0.283 ± 0.016 | 0.553 ± 0.091 | <b>0.002</b>      | 0.219 ± 0.024 | 0.357 ± 0.034 | <b>0.003</b> |
| Tibia length (mm)      | 19.30 ± 0.106 | 18.81 ± 0.103 | <b>0.005</b>      | 18.74 ± 0.159 | 18.90 ± 0.138 | 0.469        |

| Gene Symbol   | GencodeID             | Liver       |              | gWAT        |              | iWAT        |              | Skeletal Muscle |             |
|---------------|-----------------------|-------------|--------------|-------------|--------------|-------------|--------------|-----------------|-------------|
|               |                       | Log2(FC)    | Adj.p-Value  | Log2(FC)    | Adj.p-Value  | Log2(FC)    | Adj.p-Value  | Log2(FC)        | Adj.p-Value |
| Mir155        | ENSMUSG00000097418.7  | 2.04        | 0.256        | 1.09        | 0.724        | 1.49        | 0.067        | 1.40            | 0.742       |
| Mirpl39       | ENSMUSG00000022889.7  | 0.49        | 0.069        | 0.48        | 0.107        | <b>0.64</b> | <b>0.008</b> | 0.70            | 0.083       |
| Jam2          | ENSMUSG00000053062.15 | 0.44        | 0.390        | 0.91        | 0.476        | 0.00        | 0.999        | 0.54            | 0.122       |
| Atp5j         | ENSMUSG00000022890.13 | 0.46        | 0.057        | <b>0.50</b> | <b>0.016</b> | <b>0.63</b> | <b>0.015</b> | 0.50            | 0.166       |
| Gabpa         | ENSMUSG00000008976.16 | <b>0.46</b> | <b>0.027</b> | <b>0.69</b> | <b>0.013</b> | <b>0.36</b> | <b>0.044</b> | 0.58            | 0.083       |
| App           | ENSMUSG00000022892.10 | <b>1.00</b> | <b>0.009</b> | 0.54        | 0.055        | -0.07       | 0.841        | 0.87            | 0.070       |
| Cypr1         | ENSMUSG00000041134.15 | 0.17        | 0.826        | 1.08        | 0.564        | 0.00        | 1.000        | 0.63            | 0.303       |
| Adamts1       | ENSMUSG00000022893.14 | 0.32        | 0.360        | 0.51        | 0.316        | -0.28       | 0.489        | 0.09            | 0.954       |
| Adamts5       | ENSMUSG00000022894.5  | <b>1.81</b> | <b>0.031</b> | 0.42        | 0.706        | -0.62       | 0.322        | 0.85            | 0.714       |
| N6amt1        | ENSMUSG00000044442.11 | 0.68        | 0.104        | 0.61        | 0.107        | <b>0.40</b> | <b>0.042</b> | 0.33            | 0.603       |
| Iti1          | ENSMUSG00000052299.8  | 0.28        | 0.233        | <b>0.66</b> | <b>0.035</b> | 0.28        | 0.103        | 0.64            | 0.070       |
| Rwdd2b        | ENSMUSG00000041079.11 | <b>0.81</b> | <b>0.025</b> | 0.46        | 0.643        | <b>0.52</b> | <b>0.048</b> | 0.50            | 0.671       |
| Usp16         | ENSMUSG00000025616.14 | <b>0.50</b> | <b>0.037</b> | <b>0.69</b> | <b>0.011</b> | <b>0.51</b> | <b>0.007</b> | 0.33            | 0.607       |
| Cct8          | ENSMUSG00000025613.13 | <b>0.50</b> | <b>0.028</b> | 0.53        | 0.212        | <b>0.64</b> | <b>0.007</b> | 0.49            | 0.076       |
| Orf63         | ENSMUSG00000025610.7  | 0.33        | 0.904        | 0.31        | 0.888        | -0.02       | 0.993        | 0.08            | 0.988       |
| Bach1         | ENSMUSG00000025612.5  | 0.48        | 0.181        | 0.55        | 0.321        | <b>0.62</b> | <b>0.029</b> | 0.42            | 0.499       |
| Girk1         | ND                    | N/A         | N/A          | N/A         | N/A          | N/A         | N/A          | N/A             | N/A         |
| Cldn17        | ND                    | N/A         | N/A          | N/A         | N/A          | N/A         | N/A          | N/A             | N/A         |
| Cldn8         | ND                    | N/A         | N/A          | N/A         | N/A          | N/A         | N/A          | N/A             | N/A         |
| Krtap cluster | ND                    | N/A         | N/A          | N/A         | N/A          | N/A         | N/A          | N/A             | N/A         |
| Tiam1         | ENSMUSG00000002489.15 | 0.81        | 0.385        | 0.39        | 0.719        | <b>0.39</b> | <b>0.022</b> | 0.76            | 0.728       |
| Sod1          | ENSMUSG00000022982.9  | 0.41        | 0.267        | 0.42        | 0.481        | <b>0.75</b> | <b>0.028</b> | 0.45            | 0.486       |
| Scaf4         | ENSMUSG00000022983.15 | 0.18        | 0.457        | 0.33        | 0.336        | <b>0.47</b> | <b>0.043</b> | 0.52            | 0.176       |
| Hunk          | ENSMUSG00000053414.7  | 0.37        | 0.624        | 0.59        | 0.819        | 0.47        | 0.546        | 0.39            | 0.886       |
| Mrap          | ENSMUSG00000039956.8  | <b>0.87</b> | <b>0.026</b> | -0.08       | 0.963        | -0.24       | 0.766        | -0.49           | 0.985       |
| Urb1          | ENSMUSG00000039929.14 | 0.43        | 0.134        | 0.44        | 0.525        | <b>0.58</b> | <b>0.021</b> | 0.71            | 0.122       |
| Synj1         | ENSMUSG00000022973.17 | 0.46        | 0.086        | 0.58        | 0.055        | 0.54        | 0.059        | 0.74            | 0.165       |
| Gcfc1         | ENSMUSG00000022974.12 | 0.54        | 0.067        | <b>0.72</b> | <b>0.026</b> | <b>0.63</b> | <b>0.010</b> | 0.74            | 0.070       |
| Olig2         | ND                    | N/A         | N/A          | N/A         | N/A          | N/A         | N/A          | N/A             | N/A         |
| Olig1         | ENSMUSG00000046160.6  | -0.12       | 0.950        | 1.07        | 0.825        | 1.75        | 0.174        | 0.29            | 0.985       |
| Ifnar2        | ENSMUSG00000022971.18 | <b>0.94</b> | <b>0.021</b> | <b>0.78</b> | <b>0.011</b> | <b>0.61</b> | <b>0.005</b> | 1.04            | 0.438       |
| Il1orb        | ENSMUSG00000022969.13 | <b>1.07</b> | <b>0.042</b> | 0.61        | 0.212        | <b>0.86</b> | <b>0.008</b> | 0.94            | 0.407       |
| Ifnar1        | ENSMUSG00000022967.12 | <b>0.85</b> | <b>0.023</b> | <b>0.62</b> | <b>0.011</b> | <b>0.56</b> | <b>0.020</b> | 0.90            | 0.110       |
| Ifngr2        | ENSMUSG00000022965.7  | <b>1.20</b> | <b>0.028</b> | 0.49        | 0.085        | <b>0.69</b> | <b>0.015</b> | 0.37            | 0.311       |
| Tmem50b       | ENSMUSG00000022964.14 | 0.52        | 0.203        | 0.68        | 0.078        | <b>0.38</b> | <b>0.034</b> | 0.72            | 0.070       |
| Dnajc28       | ENSMUSG00000039763.9  | <b>0.61</b> | <b>0.044</b> | 0.69        | 0.525        | 0.30        | 0.524        | 0.59            | 0.433       |
| Gart          | ENSMUSG00000022962.14 | 0.58        | 0.064        | 0.54        | 0.055        | <b>0.53</b> | <b>0.007</b> | 0.54            | 0.087       |
| Son           | ENSMUSG00000022961.17 | 0.36        | 0.054        | <b>0.84</b> | <b>0.011</b> | <b>0.69</b> | <b>0.007</b> | 0.49            | 0.083       |
| Donson        | ENSMUSG00000022960.12 | 0.61        | 0.111        | 0.71        | 0.469        | <b>1.08</b> | <b>0.003</b> | 0.63            | 0.715       |
| Cryz11        | ENSMUSG00000058240.13 | <b>0.55</b> | <b>0.029</b> | <b>0.64</b> | <b>0.011</b> | <b>0.84</b> | <b>0.008</b> | 0.42            | 0.328       |
| Itsn1         | ENSMUSG00000022957.19 | 0.49        | 0.195        | 0.36        | 0.277        | 0.09        | 0.811        | 0.40            | 0.189       |
| Atp5o         | ENSMUSG00000022956.10 | 0.54        | 0.053        | 0.45        | 0.138        | <b>0.57</b> | <b>0.034</b> | 0.50            | 0.122       |
| Slc5a3        | ENSMUSG00000089774.2  | -0.62       | 0.193        | 0.20        | 0.887        | -0.56       | 0.196        | 0.42            | 0.878       |
| Mrsp6         | ENSMUSG00000039680.9  | <b>0.73</b> | <b>0.026</b> | 0.41        | 0.525        | 0.16        | 0.647        | 0.70            | 0.596       |
| Kcne2         | ND                    | N/A         | N/A          | N/A         | N/A          | N/A         | N/A          | N/A             | N/A         |
| Kcne1         | ND                    | N/A         | N/A          | N/A         | N/A          | N/A         | N/A          | N/A             | N/A         |
| Rcan1         | ENSMUSG00000022951.15 | 0.49        | 0.352        | 0.48        | 0.292        | 0.32        | 0.195        | 0.20            | 0.926       |
| Clic6         | ND                    | N/A         | N/A          | N/A         | N/A          | N/A         | N/A          | N/A             | N/A         |
| Runx1         | ENSMUSG00000022952.16 | 1.28        | 0.381        | 0.28        | 0.662        | 0.95        | 0.069        | 1.42            | 0.346       |
| Mir802        | ENSMUSG00000076457.1  | 0.44        | 0.877        | -0.11       | 0.953        | 0.19        | 0.751        | -0.03           | 0.988       |
| Setd4         | ENSMUSG00000022948.14 | -0.57       | 0.320        | 0.46        | 0.539        | 0.70        | 0.083        | 0.53            | 0.594       |
| Cbr1          | ENSMUSG00000051483.8  | 0.28        | 0.503        | 0.49        | 0.055        | 0.58        | 0.051        | 0.55            | 0.087       |
| Cbr3          | ENSMUSG00000022947.7  | 1.31        | 0.117        | 0.19        | 0.931        | <b>1.13</b> | <b>0.028</b> | 0.80            | 0.709       |
| Dopey2        | ENSMUSG00000022946.8  | 0.32        | 0.410        | 0.29        | 0.614        | 0.16        | 0.306        | 0.62            | 0.303       |
| Morc3         | ENSMUSG00000039456.9  | 0.43        | 0.283        | <b>0.57</b> | <b>0.016</b> | <b>0.62</b> | <b>0.040</b> | 0.62            | 0.070       |
| Chaf1b        | ENSMUSG00000022945.11 | 1.28        | 0.209        | 0.90        | 0.212        | <b>1.51</b> | <b>0.005</b> | 0.99            | 0.660       |
| Cldn14        | ENSMUSG00000047109.12 | <b>1.22</b> | <b>0.038</b> | -0.89       | 0.774        | 0.28        | 0.758        | -2.15           | 0.594       |
| Sim2          | ENSMUSG00000062713.7  | -0.31       | 0.805        | -0.96       | 0.820        | 0.83        | 0.601        | 0.49            | 0.720       |
| Hlcs          | ENSMUSG00000040820.15 | <b>1.38</b> | <b>0.022</b> | 0.80        | 0.321        | <b>0.59</b> | <b>0.005</b> | 0.27            | 0.660       |
| Ripply3       | ENSMUSG00000022941.8  | 0.82        | 0.368        | 0.82        | 0.557        | 0.57        | 0.085        | 0.71            | 0.584       |
| Pigp          | ENSMUSG00000022940.16 | <b>0.91</b> | <b>0.016</b> | 0.80        | 0.082        | <b>0.46</b> | <b>0.049</b> | 0.33            | 0.535       |
| Ttc3          | ENSMUSG00000040785.18 | <b>0.66</b> | <b>0.029</b> | <b>0.72</b> | <b>0.026</b> | 0.37        | 0.065        | 0.51            | 0.311       |
| Dscr3         | ENSMUSG00000022898.12 | <b>0.71</b> | <b>0.030</b> | 0.60        | 0.078        | <b>0.70</b> | <b>0.007</b> | 0.68            | 0.083       |
| Dyrk1a        | ENSMUSG00000022897.14 | <b>0.59</b> | <b>0.038</b> | 0.63        | 0.066        | <b>0.56</b> | <b>0.009</b> | 0.42            | 0.607       |
| Kcnj6         | ND                    | N/A         | N/A          | N/A         | N/A          | N/A         | N/A          | N/A             | N/A         |
| Kcnj15        | ENSMUSG00000062609.13 | 0.79        | 0.713        | 0.55        | 0.818        | -0.58       | 0.376        | 0.53            | 0.937       |
| Erg           | ENSMUSG00000040732.18 | 0.77        | 0.245        | 0.63        | 0.745        | -0.23       | 0.603        | 0.47            | 0.590       |
| Ets           | ENSMUSG00000032035.15 | 0.04        | 0.950        | 0.22        | 0.814        | -0.11       | 0.858        | 0.14            | 0.941       |
| Psmg1         | ENSMUSG00000022913.14 | <b>0.62</b> | <b>0.031</b> | 0.46        | 0.447        | 0.50        | 0.052        | 0.63            | 0.445       |
| Brwd1         | ENSMUSG00000022914.15 | 0.18        | 0.477        | <b>0.66</b> | <b>0.011</b> | <b>0.79</b> | <b>0.016</b> | 0.53            | 0.087       |
| Hmgn1         | ENSMUSG00000040681.14 | <b>0.56</b> | <b>0.026</b> | 0.56        | 0.218        | <b>0.76</b> | <b>0.002</b> | 0.55            | 0.146       |
| Wrb           | ENSMUSG00000023147.15 | 0.82        | 0.151        | 0.51        | 0.344        | 0.31        | 0.115        | 0.56            | 0.504       |
| Ica5l         | ENSMUSG00000045275.15 | 1.05        | 0.740        | 0.67        | 0.586        | 0.62        | 0.455        | -0.03           | 0.988       |
| Sh3bgr        | ENSMUSG00000040666.17 | 1.28        | 0.360        | 1.27        | 0.767        | 1.54        | 0.195        | 0.40            | 0.685       |
| B3galt5       | ND                    | N/A         | N/A          | N/A         | N/A          | N/A         | N/A          | N/A             | N/A         |
| Igsf5         | ENSMUSG00000000159.15 | <b>0.63</b> | <b>0.025</b> | 0.57        | 0.949        | 0.64        | 0.577        | -1.27           | 0.762       |
| Irgb2l        | ENSMUSG00000000157.15 | -0.07       | 0.929        | -0.41       | 0.964        | 3.50        | 0.097        | -0.07           | 0.988       |
| Pcp4          | ENSMUSG00000090223.1  | -0.31       | 0.805        | 0.45        | 0.953        | 2.14        | 0.064        | 0.06            | 0.991       |
| Dscam         | ND                    | N/A         | N/A          | N/A         | N/A          | N/A         | N/A          | N/A             | N/A         |
| Bace2         | ENSMUSG00000040605.6  | 1.02        | 0.105        | 1.21        | 0.122        | <b>0.80</b> | <b>0.026</b> | 1.15            | 0.579       |
| Mx1           | ENSMUSG00000000386.14 | <b>1.43</b> | <b>0.040</b> | 0.89        | 0.662        | 1.48        | 0.125        | 1.50            | 0.760       |
| Fam3b         | ND                    | N/A         | N/A          | N/A         | N/A          | N/A         | N/A          | N/A             | N/A         |
| Mx2           | ENSMUSG00000023341.14 | 0.94        | 0.120        | 0.46        | 0.779        | 0.97        | 0.248        | 0.59            | 0.803       |
| Tmprss2       | ENSMUSG00000000385.7  | 0.62        | 0.553        | 2.01        | 0.828        | -0.37       | 0.734        | -0.15           | 0.988       |
| Ripk4         | ENSMUSG00000005251.14 | 0.75        | 0.160        | 1.29        | 0.796        | 0.16        | 0.892        | 0.07            | 0.988       |
| Prdm15        | ENSMUSG00000014039.17 | -0.07       | 0.921        | 0.65        | 0.311        | 0.27        | 0.359        | 0.37            | 0.535       |
| C2cd2         | ENSMUSG00000045975.7  | <b>0.38</b> | <b>0.035</b> | 0.43        | 0.602        | 0.25        | 0.172        | 0.46            | 0.600       |
| Zfp295        | ND                    | N/A         | N/A          | N/A         | N/A          | N/A         | N/A          | N/A             | N/A         |

ND = not detected  
N/A = not applicable



**Table S3. All triplicated protein-coding genes on Mmu17 not related to Hsa21.**

| Gene Symbol          | GencodeID             | Liver       |               | gWAT        |               | iWAT        |               | Skeletal Muscle |             |
|----------------------|-----------------------|-------------|---------------|-------------|---------------|-------------|---------------|-----------------|-------------|
|                      |                       | Log2(FC)    | Adj.p-Value   | Log2(FC)    | Adj.p-Value   | Log2(FC)    | Adj.p-Value   | Log2(FC)        | Adj.p-Value |
| <i>Scaf8</i>         | ENSMUSG00000046201.8  | <b>0.57</b> | <b>0.0466</b> | <b>0.62</b> | <b>0.0111</b> | <b>0.52</b> | <b>0.0152</b> | 0.33            | 0.4072      |
| <i>Tiam2</i>         | ENSMUSG00000023800.14 | 0.10        | 0.8411        | 1.01        | 0.2605        | <b>1.01</b> | <b>0.0433</b> | 0.87            | 0.3424      |
| <i>Tfb1m</i>         | ENSMUSG00000036983.6  | 0.54        | 0.0840        | 0.44        | 0.5973        | <b>0.71</b> | <b>0.0163</b> | 0.35            | 0.6355      |
| <i>Cldn20</i>        | ENSMUSG00000091530.1  | 0.22        | 0.9496        | 0.72        | 0.8296        | 1.58        | 0.1323        | -0.08           | 0.9876      |
| <i>Nox3</i>          | ENSMUSG00000023802    | N/A         | N/A           | N/A         | N/A           | N/A         | N/A           | N/A             | N/A         |
| <i>Arid1b</i>        | ENSMUSG00000069729.13 | <b>0.47</b> | <b>0.0439</b> | 0.53        | 0.0911        | 0.35        | 0.0633        | 0.48            | 0.5838      |
| <i>Tmem242</i>       | ENSMUSG0000004945.15  | <b>0.73</b> | <b>0.0145</b> | <b>0.60</b> | <b>0.0111</b> | <b>0.65</b> | <b>0.0220</b> | 0.55            | 0.0874      |
| <i>ldhal6b</i>       | ENSMUSG00000101959    | N/A         | N/A           | N/A         | N/A           | N/A         | N/A           | N/A             | N/A         |
| <i>Zdhhc14</i>       | ENSMUSG00000034265.7  | 0.59        | 0.1511        | 0.33        | 0.5369        | <b>0.78</b> | <b>0.0236</b> | 0.66            | 0.4989      |
| <i>Srx9</i>          | ENSMUSG00000002365.9  | <b>0.66</b> | <b>0.0210</b> | <b>0.63</b> | <b>0.0111</b> | <b>0.42</b> | <b>0.0381</b> | 0.46            | 0.1218      |
| <i>Synj2</i>         | ENSMUSG00000023805.16 | 1.15        | 0.0323        | 0.63        | 0.0850        | 0.44        | 0.1436        | 0.88            | 0.2001      |
| <i>Serac1</i>        | ENSMUSG00000015659.12 | 0.32        | 0.4935        | 0.68        | 0.2406        | 0.17        | 0.4690        | 0.55            | 0.0874      |
| <i>Gtf2h5</i>        | ENSMUSG00000034345.14 | <b>0.82</b> | <b>0.0091</b> | 0.38        | 0.2183        | 0.30        | 0.2091        | 0.41            | 0.4806      |
| <i>Tulp4</i>         | ENSMUSG00000034377.10 | 0.01        | 0.9695        | 0.39        | 0.5935        | 0.22        | 0.2479        | 0.41            | 0.5325      |
| <i>Tmem181a</i>      | ENSMUSG00000038141.9  | 0.48        | 0.2709        | 0.26        | 0.5568        | 0.42        | 0.0787        | 0.52            | 0.4755      |
| <i>Dynl1a</i>        | ENSMUSG00000092074.1  | 0.96        | 0.7126        | 0.93        | 0.5973        | <b>1.46</b> | <b>0.0391</b> | 1.48            | 0.5905      |
| <i>Dynl1b</i>        | ENSMUSG00000096255.1  | 1.23        | 0.2239        | 0.59        | 0.7519        | <b>1.29</b> | <b>0.0169</b> | 0.66            | 0.7733      |
| <i>Dynl1c</i>        | ENSMUSG00000000579.14 | 0.34        | 0.6416        | 0.65        | 0.5973        | <b>0.99</b> | <b>0.0059</b> | 0.60            | 0.6773      |
| <i>Dynl1f</i>        | ENSMUSG00000095677.1  | 1.23        | 0.1539        | 0.60        | 0.3274        | <b>0.90</b> | <b>0.0433</b> | 0.66            | 0.4788      |
| <i>Sytl3</i>         | ENSMUSG00000041831.15 | 2.17        | 0.2578        | 1.11        | 0.6458        | <b>1.04</b> | <b>0.0310</b> | -0.26           | 0.9876      |
| <i>Ezr</i>           | ENSMUSG00000052397.8  | <b>1.74</b> | <b>0.0260</b> | 0.70        | 0.3358        | <b>1.25</b> | <b>0.0381</b> | 1.12            | 0.5838      |
| <i>Rsph3b</i>        | ENSMUSG00000023806.9  | 0.44        | 0.1780        | 0.27        | 0.6011        | 0.70        | 0.0651        | 0.43            | 0.5353      |
| <i>Tagap1</i>        | ENSMUSG00000052031.7  | <b>0.75</b> | <b>0.0226</b> | 0.68        | 0.0958        | <b>0.79</b> | <b>0.0256</b> | 0.12            | 0.8956      |
| <i>Rnaset2b</i>      | ENSMUSG00000094724.7  | 0.62        | 0.0609        | 0.46        | 0.5092        | <b>0.90</b> | <b>0.0085</b> | 0.32            | 0.7116      |
| <i>Gm1604b</i>       | ENSMUSG00000094083    | N/A         | N/A           | N/A         | N/A           | N/A         | N/A           | N/A             | N/A         |
| <i>Rps6ka2</i>       | ENSMUSG00000023809.9  | -0.05       | 0.9639        | 0.38        | 0.7502        | 0.35        | 0.1843        | 0.27            | 0.7302      |
| <i>Tcp10a</i>        | ENSMUSG00000071322    | N/A         | N/A           | N/A         | N/A           | N/A         | N/A           | N/A             | N/A         |
| <i>Till2</i>         | ENSMUSG00000079722    | N/A         | N/A           | N/A         | N/A           | N/A         | N/A           | N/A             | N/A         |
| <i>Gm9992</i>        | ENSMUSG00000056133.4  | -0.01       | 0.9930        | 0.93        | 0.8792        | 1.18        | 0.4625        | 0.98            | 0.8422      |
| <i>Fndc1</i>         | ENSMUSG00000071984.10 | 0.50        | 0.8779        | 0.76        | 0.6706        | -0.03       | 0.9746        | 0.48            | 0.8344      |
| <i>Tagap</i>         | ENSMUSG00000033450.7  | 1.23        | 0.1532        | 1.20        | 0.2046        | <b>1.63</b> | <b>0.0378</b> | 0.82            | 0.6027      |
| <i>Rsph3a</i>        | ENSMUSG00000073471.2  | <b>0.97</b> | <b>0.0297</b> | 0.74        | 0.3822        | 0.62        | 0.0744        | 0.46            | 0.7015      |
| <i>Rnaset2a</i>      | ENSMUSG00000095687.1  | <b>0.78</b> | <b>0.0287</b> | 0.72        | 0.2406        | <b>1.02</b> | <b>0.0051</b> | 0.72            | 0.4465      |
| <i>Ccr6</i>          | ENSMUSG00000040899.13 | 1.43        | 0.5012        | 2.42        | 0.6137        | 2.93        | 0.2189        | 1.51            | 0.7309      |
| <i>Mpc1</i>          | ENSMUSG00000023861.17 | -0.07       | 0.8854        | -0.09       | 0.9302        | 0.28        | 0.2456        | 0.48            | 0.1218      |
| <i>Sft2d1</i>        | ENSMUSG00000073468.11 | <b>0.42</b> | <b>0.0468</b> | 0.35        | 0.5973        | <b>0.82</b> | <b>0.0014</b> | 0.58            | 0.5071      |
| <i>Prr18</i>         | ENSMUSG00000055945.7  | 0.30        | 0.7086        | 0.94        | 0.6920        | 1.08        | 0.3805        | 1.43            | 0.7284      |
| <i>T2</i>            | ENSMUSG00000058159    | N/A         | N/A           | N/A         | N/A           | N/A         | N/A           | N/A             | N/A         |
| <i>T</i>             | ENSMUSG00000062327    | N/A         | N/A           | N/A         | N/A           | N/A         | N/A           | N/A             | N/A         |
| <i>Pde10a</i>        | ENSMUSG00000023868.15 | 2.02        | 0.0997        | 0.35        | 0.6980        | 0.23        | 0.6781        | 0.60            | 0.6355      |
| <i>1700010114Rik</i> | ENSMUSG00000023873.12 | 1.42        | 0.2880        | 0.37        | 0.8060        | 1.07        | 0.1028        | 1.09            | 0.7518      |

Table S4

Up-regulated DEGs in gonadal white adipose tissue (gWAT)

| Gene Symbol | Log2(FC) | Adj.p-Value | Gene Type      | GencodeID             | EntrezID |
|-------------|----------|-------------|----------------|-----------------------|----------|
| Xlr4c       | 2.17     | 0.013       | protein_coding | ENSMUSG00000031362.17 | 72891    |
| Son         | 0.84     | 0.011       | protein_coding | ENSMUSG00000022961.17 | 20658    |
| Ifnar2      | 0.78     | 0.011       | protein_coding | ENSMUSG00000022971.18 | 15976    |
| Ttc3        | 0.72     | 0.026       | protein_coding | ENSMUSG00000040785.18 | 22129    |
| Paxbp1      | 0.72     | 0.026       | protein_coding | ENSMUSG00000022974.12 | 67367    |
| Gabpa       | 0.69     | 0.013       | protein_coding | ENSMUSG00000008976.16 | 14390    |
| Usp16       | 0.69     | 0.011       | protein_coding | ENSMUSG00000025616.14 | 74112    |
| Ltn1        | 0.66     | 0.035       | protein_coding | ENSMUSG00000052299.8  | 78913    |
| Brwd1       | 0.66     | 0.011       | protein_coding | ENSMUSG00000022914.15 | 93871    |
| Cryz11      | 0.64     | 0.011       | protein_coding | ENSMUSG00000058240.13 | 66609    |
| Snx9        | 0.63     | 0.011       | protein_coding | ENSMUSG00000002365.9  | 66616    |
| Ifnar1      | 0.62     | 0.011       | protein_coding | ENSMUSG00000022967.12 | 15975    |
| Scaf8       | 0.62     | 0.011       | protein_coding | ENSMUSG00000046201.8  | 106583   |
| Tmem242     | 0.60     | 0.011       | protein_coding | ENSMUSG00000004945.15 | 70544    |
| Morc3       | 0.57     | 0.016       | protein_coding | ENSMUSG00000039456.9  | 338467   |

gWAT down-regulated DEGs

| Gene Symbol | Log2(FC) | Adj.p-Value | Gene Type | GencodeID            | EntrezID |
|-------------|----------|-------------|-----------|----------------------|----------|
| Rn18s-rs5   | -1.44    | 0.035       | rRNA      | ENSMUSG00000106106.2 | NA       |

Table S5

Up-regulated DEGs in inguinal white adipose tissue (IWAT)

| Gene Symbol   | Log2(FC) | Adj.p-Value | Gene Type              | GeneID               | EntrezID  |
|---------------|----------|-------------|------------------------|----------------------|-----------|
| Igh1          | 9.13     | 0.001       | IG_C_gene              | ENSMUSG0000076614.7  | NA        |
| Igh2b         | 7.32     | 0.002       | IG_C_gene              | ENSMUSG0000076613.3  | NA        |
| Igh2c         | 7.21     | 0.005       | IG_C_gene              | ENSMUSG0000076612.7  | NA        |
| Igkv5-43      | 6.34     | 0.019       | IG_V_gene              | ENSMUSG0000094433.2  | NA        |
| Ighv5-6       | 5.99     | 0.002       | IG_V_gene              | ENSMUSG0000094951.1  | NA        |
| Sipi          | 5.70     | 0.007       | protein_coding         | ENSMUSG0000017002.14 | 20568     |
| Igkv15-103    | 5.70     | 0.004       | IG_V_gene              | ENSMUSG0000076523.2  | NA        |
| Ighv9-3       | 5.51     | 0.007       | IG_V_gene              | ENSMUSG0000096459.1  | NA        |
| Igkv4-63      | 5.49     | 0.008       | IG_V_gene              | ENSMUSG0000076550.3  | NA        |
| Ighv5-4       | 5.48     | 0.008       | IG_V_gene              | ENSMUSG0000095612.2  | NA        |
| Igkv12-46     | 5.46     | 0.001       | IG_V_gene              | ENSMUSG0000076564.2  | NA        |
| Igkv6-14      | 5.45     | 0.005       | IG_V_gene              | ENSMUSG0000096844.1  | NA        |
| Igh3          | 5.43     | 0.026       | IG_C_gene              | ENSMUSG0000076615.3  | NA        |
| Igkv3-12      | 5.42     | 0.001       | IG_V_gene              | ENSMUSG0000094117.1  | NA        |
| Igkv5-48      | 5.35     | 0.005       | IG_V_gene              | ENSMUSG0000076562.2  | NA        |
| Ighv1-78      | 5.07     | 0.021       | IG_V_gene              | ENSMUSG0000096326.2  | NA        |
| Ighv1-82      | 5.00     | 0.005       | IG_V_gene              | ENSMUSG0000095127.2  | NA        |
| Ighv2-9-1     | 4.99     | 0.038       | IG_V_gene              | ENSMUSG0000095565.2  | NA        |
| Ighv1-7       | 4.95     | 0.010       | IG_V_gene              | ENSMUSG0000095200.2  | NA        |
| Igkv4-55      | 4.84     | 0.017       | IG_V_gene              | ENSMUSG0000096832.2  | NA        |
| Iglc1         | 4.81     | 0.002       | IG_C_gene              | ENSMUSG00000105906.1 | NA        |
| Iglv1         | 4.80     | 0.001       | IG_V_gene              | ENSMUSG0000076934.2  | NA        |
| Igkv9-124     | 4.80     | 0.017       | IG_V_gene              | ENSMUSG0000096632.2  | NA        |
| Igkv17-121    | 4.79     | 0.032       | IG_V_gene              | ENSMUSG0000076514.3  | NA        |
| Ighv1-26      | 4.73     | 0.013       | IG_V_gene              | ENSMUSG0000094542.1  | NA        |
| Jchain        | 4.73     | 0.007       | protein_coding         | ENSMUSG0000067149.6  | 16069     |
| Igkv6-15      | 4.72     | 0.028       | IG_V_gene              | ENSMUSG0000094977.1  | NA        |
| Igkv4-72      | 4.65     | 0.030       | IG_V_gene              | ENSMUSG0000076545.2  | NA        |
| Ighv1-80      | 4.63     | 0.008       | IG_V_gene              | ENSMUSG0000094075.1  | NA        |
| Ighv2-3       | 4.57     | 0.003       | IG_V_gene              | ENSMUSG0000094164.2  | NA        |
| Ighv5-9-1     | 4.57     | 0.001       | IG_V_gene              | ENSMUSG0000095210.2  | NA        |
| Ighv1-64      | 4.56     | 0.008       | IG_V_gene              | ENSMUSG0000094088.2  | NA        |
| Igkv19-93     | 4.56     | 0.016       | IG_V_gene              | ENSMUSG0000098814.2  | NA        |
| Igkv17-127    | 4.54     | 0.030       | IG_V_gene              | ENSMUSG0000076508.3  | NA        |
| Ighv14-3      | 4.53     | 0.013       | IG_V_gene              | ENSMUSG0000095642.3  | NA        |
| Igkv4-50      | 4.51     | 0.007       | IG_V_gene              | ENSMUSG0000076562.1  | NA        |
| Igkc          | 4.50     | 0.001       | IG_C_gene              | ENSMUSG0000076609.2  | NA        |
| Ighv1-39      | 4.48     | 0.013       | IG_V_gene              | ENSMUSG0000095130.1  | NA        |
| Ighv1-66      | 4.46     | 0.014       | IG_V_gene              | ENSMUSG0000095519.2  | NA        |
| Igkv4-53      | 4.43     | 0.038       | IG_V_gene              | ENSMUSG0000095753.2  | NA        |
| Igkv10-96     | 4.39     | 0.001       | IG_V_gene              | ENSMUSG0000094420.2  | NA        |
| Ighv7-3       | 4.36     | 0.007       | IG_V_gene              | ENSMUSG0000076652.4  | NA        |
| Igkv1-135     | 4.36     | 0.017       | IG_V_gene              | ENSMUSG0000096336.2  | NA        |
| Igkv12-44     | 4.31     | 0.041       | IG_V_gene              | ENSMUSG0000096422.2  | NA        |
| Igkv14-111    | 4.28     | 0.020       | IG_V_gene              | ENSMUSG0000095771.2  | NA        |
| Igkv1-117     | 4.27     | 0.009       | IG_V_gene              | ENSMUSG0000094335.2  | NA        |
| Igkv12-98     | 4.26     | 0.008       | IG_V_gene              | ENSMUSG0000076526.6  | NA        |
| Igkv8-21      | 4.26     | 0.004       | IG_V_gene              | ENSMUSG0000076586.2  | NA        |
| Igkv10-94     | 4.24     | 0.043       | IG_V_gene              | ENSMUSG0000096490.1  | NA        |
| Ighv1-4       | 4.23     | 0.040       | IG_V_gene              | ENSMUSG0000095441.1  | NA        |
| Nuggc         | 4.23     | 0.041       | protein_coding         | ENSMUSG0000061356.13 | 100503545 |
| Igkv3-10      | 4.17     | 0.011       | IG_V_gene              | ENSMUSG0000076596.3  | NA        |
| Igkv3-5       | 4.14     | 0.048       | IG_V_gene              | ENSMUSG0000095335.2  | NA        |
| Mzb1          | 4.13     | 0.003       | protein_coding         | ENSMUSG0000024353.4  | 69816     |
| Ighv1-50      | 4.11     | 0.013       | IG_V_gene              | ENSMUSG0000094198.2  | NA        |
| Igkv5-39      | 4.07     | 0.012       | IG_V_gene              | ENSMUSG0000076569.3  | NA        |
| Igkv4-68      | 4.01     | 0.028       | IG_V_gene              | ENSMUSG0000076549.2  | NA        |
| Igkv8-24      | 3.99     | 0.031       | IG_V_gene              | ENSMUSG0000076583.1  | NA        |
| Ighv14-2      | 3.98     | 0.005       | IG_V_gene              | ENSMUSG0000095583.1  | NA        |
| Ighv1-53      | 3.88     | 0.012       | IG_V_gene              | ENSMUSG0000095384.1  | NA        |
| Igkv13-84     | 3.85     | 0.029       | IG_V_gene              | ENSMUSG0000076538.1  | NA        |
| Igkjb4        | 3.84     | 0.032       | IG_J_gene              | ENSMUSG0000076607.1  | NA        |
| Ighv6-3       | 3.83     | 0.046       | IG_V_gene              | ENSMUSG0000076677.1  | NA        |
| Igkv4-57      | 3.81     | 0.049       | IG_V_gene              | ENSMUSG0000076556.3  | NA        |
| Ighv2-2       | 3.81     | 0.002       | IG_V_gene              | ENSMUSG0000096464.2  | NA        |
| Igkv6-13      | 3.80     | 0.018       | IG_V_gene              | ENSMUSG0000076594.2  | NA        |
| Ighv3-8       | 3.79     | 0.026       | IG_V_gene              | ENSMUSG0000076674.2  | NA        |
| Ighv10-3      | 3.78     | 0.026       | IG_V_gene              | ENSMUSG0000095700.2  | NA        |
| Ighv10-1      | 3.70     | 0.040       | IG_V_gene              | ENSMUSG0000095981.1  | NA        |
| Ighv8-8       | 3.69     | 0.038       | IG_V_gene              | ENSMUSG00000104452.1 | NA        |
| Ighv1-72      | 3.68     | 0.020       | IG_V_gene              | ENSMUSG0000096074.2  | NA        |
| Gm21960       | 3.64     | 0.016       | processed_pseudogene   | ENSMUSG0000095836.3  | NA        |
| Ighv1-22      | 3.64     | 0.010       | IG_V_gene              | ENSMUSG0000094561.1  | NA        |
| Igha          | 3.63     | 0.029       | IG_C_gene              | ENSMUSG0000095079.6  | NA        |
| Igkv4-58      | 3.61     | 0.013       | IG_V_gene              | ENSMUSG0000096332.2  | NA        |
| Igkv1-110     | 3.55     | 0.035       | IG_V_gene              | ENSMUSG0000093861.2  | NA        |
| Igkv14-130    | 3.50     | 0.021       | IG_V_gene              | ENSMUSG0000096461.5  | NA        |
| AI847159      | 3.47     | 0.017       | antisense              | ENSMUSG0000084826.7  | 100048701 |
| Xlr4e-ps      | 3.47     | 0.011       | unprocessed_pseudogene | ENSMUSG0000081357.1  | NA        |
| Igcl2         | 3.44     | 0.031       | IG_C_gene              | ENSMUSG0000076937.3  | NA        |
| Mrgprb13      | 3.41     | 0.011       | unprocessed_pseudogene | ENSMUSG0000099620.1  | 620137    |
| Bhlha15       | 3.37     | 0.026       | protein_coding         | ENSMUSG0000052271.7  | 17341     |
| Igkv4-74      | 3.36     | 0.049       | IG_V_gene              | ENSMUSG0000076543.2  | NA        |
| Igkv4-90      | 3.33     | 0.013       | IG_V_gene              | ENSMUSG0000076533.3  | NA        |
| Igkv4-57-1    | 3.31     | 0.025       | IG_V_gene              | ENSMUSG0000076555.3  | NA        |
| Igkv4-70      | 3.26     | 0.026       | IG_V_gene              | ENSMUSG0000076547.2  | NA        |
| Ighv1-36      | 3.13     | 0.020       | IG_V_gene              | ENSMUSG0000094051.6  | NA        |
| Gesam         | 3.09     | 0.028       | protein_coding         | ENSMUSG0000022659.13 | 14525     |
| Ighv1-63      | 3.08     | 0.031       | IG_V_gene              | ENSMUSG0000096672.1  | NA        |
| 5830418P13Rik | 3.07     | 0.023       | processed_transcript   | ENSMUSG0000086236.7  | 100529079 |
| Dert3         | 3.06     | 0.030       | protein_coding         | ENSMUSG0000090992.4  | NA        |
| Ighv2-4       | 2.98     | 0.043       | IG_V_gene              | ENSMUSG0000095866.1  | NA        |
| Gm17571       | 2.75     | 0.043       | protein_coding         | ENSMUSG0000090592.2  | NA        |
| Eaf2          | 2.66     | 0.049       | protein_coding         | ENSMUSG0000022838.13 | 106389    |
| Cxcl13        | 2.60     | 0.042       | protein_coding         | ENSMUSG0000023078.6  | 55985     |
| Iglj1         | 2.60     | 0.026       | IG_J_gene              | ENSMUSG00000106668.1 | NA        |
| Actn2         | 2.58     | 0.023       | protein_coding         | ENSMUSG0000052374.14 | 11472     |
| Snora62       | 2.56     | 0.042       | snoRNA                 | ENSMUSG0000064925.1  | NA        |
| Trp53tg5      | 2.44     | 0.022       | protein_coding         | ENSMUSG0000017720.2  | 73603     |
| Fpr2          | 2.41     | 0.038       | protein_coding         | ENSMUSG0000052270.7  | 14289     |

IWAT down-regulated DEGs

| Gene Symbol   | Log2(FC) | Adj.p-Value | Gene Type                          | GeneID                 | EntrezID  |
|---------------|----------|-------------|------------------------------------|------------------------|-----------|
| Cck           | -3.49    | 0.004       | protein_coding                     | ENSMUSG00000032532.6   | 12424     |
| Tph2          | -2.98    | 0.026       | protein_coding                     | ENSMUSG0000006764.8    | 216343    |
| RP23-389N20.2 | -2.59    | 0.013       | processed_transcript               | ENSMUSG00000109783.1   | NA        |
| Gm37784       | -2.51    | 0.042       | processed_pseudogene               | ENSMUSG00000102525.1   | NA        |
| Abcc2         | -2.37    | 0.019       | protein_coding                     | ENSMUSG00000025194.5   | 12780     |
| Gm6054        | -2.23    | 0.043       | processed_pseudogene               | ENSMUSG00000057157.3   | NA        |
| RP23-453P1.1  | -2.19    | 0.041       | TEC                                | ENSMUSG00000109909.1   | NA        |
| 201010301Rik  | -2.18    | 0.026       | antisense                          | ENSMUSG00000104368.1   | 69889     |
| Gm42778       | -2.15    | 0.026       | TEC                                | ENSMUSG00000105112.1   | NA        |
| Cdk14         | -1.97    | 0.006       | protein_coding                     | ENSMUSG00000033966.7   | 381113    |
| DS30033B14Rik | -1.97    | 0.043       | antisense                          | ENSMUSG00000108332.1   | NA        |
| Fam84a        | -1.80    | 0.047       | protein_coding                     | ENSMUSG00000020607.6   | NA        |
| Gm28644       | -1.78    | 0.046       | lincRNA                            | ENSMUSG00000100237.1   | NA        |
| Diras2        | -1.76    | 0.008       | protein_coding                     | ENSMUSG00000047842.6   | 68203     |
| Wat8b         | -1.71    | 0.042       | protein_coding                     | ENSMUSG00000033966.7   | 22423     |
| Scd3          | -1.58    | 0.040       | protein_coding                     | ENSMUSG00000025202.7   | 30049     |
| Fgf9          | -1.58    | 0.017       | protein_coding                     | ENSMUSG00000021974.14  | 14180     |
| Gm11766       | -1.56    | 0.020       | lincRNA                            | ENSMUSG00000086924.1   | NA        |
| Gm18190       | -1.50    | 0.035       | transcribed_unprocessed_pseudogene | ENSMUSG00000098900.2   | NA        |
| Trab2b        | -1.38    | 0.026       | protein_coding                     | ENSMUSG00000070867.4   | 666048    |
| Ret           | -1.37    | 0.034       | protein_coding                     | ENSMUSG00000030110.13  | NA        |
| Slec8a1       | -1.37    | 0.013       | protein_coding                     | ENSMUSG00000054640.14  | 20541     |
| Hspa1b        | -1.35    | 0.041       | protein_coding                     | ENSMUSG00000090877.3   | 15511     |
| Slec13a4      | -1.35    | 0.049       | protein_coding                     | ENSMUSG00000029843.4   | 243755    |
| Shisa6        | -1.31    | 0.028       | protein_coding                     | ENSMUSG00000053930.13  | 380702    |
| Pm20d1        | -1.31    | 0.021       | protein_coding                     | ENSMUSG00000042251.12  | 212933    |
| Casq1         | -1.24    | 0.026       | protein_coding                     | ENSMUSG00000007122.11  | 12372     |
| Matn2         | -1.23    | 0.017       | protein_coding                     | ENSMUSG00000002234.14  | 17181     |
| Ptpfr         | -1.17    | 0.002       | protein_coding                     | ENSMUSG00000033295.13  | 19268     |
| Lpgat1        | -1.16    | 0.035       | protein_coding                     | ENSMUSG00000026623.16  | 226856    |
| Gja1          | -1.13    | 0.043       | protein_coding                     | ENSMUSG00000050953.9   | 14609     |
| Copg2         | -1.12    | 0.043       | protein_coding                     | ENSMUSG00000025607.15  | 54160     |
| A430105119Rik | -1.10    | 0.048       | protein_coding                     | ENSMUSG00000045838.8   | 214239    |
| Serpina3c     | -1.10    | 0.049       | protein_coding                     | ENSMUSG00000066361.3   | 16625     |
| Plekhh2       | -1.09    | 0.019       | protein_coding                     | ENSMUSG00000040852.5   | 213556    |
| Nnmat2        | -1.07    | 0.024       | protein_coding                     | ENSMUSG00000042751.14  | 226518    |
| Gm9951        | -1.07    | 0.021       | lincRNA                            | ENSMUSG00000054618.8   | NA        |
| Fmr1          | -1.06    | 0.041       | protein_coding                     | ENSMUSG00000000838.17  | 14265     |
| Lrp11         | -1.05    | 0.026       | protein_coding                     | ENSMUSG00000019796.12  | 237253    |
| Dst           | -1.03    | 0.040       | protein_coding                     | ENSMUSG00000026131.18  | 13518     |
| Lpin3         | -1.01    | 0.029       | protein_coding                     | ENSMUSG00000027412.12  | 64899     |
| Tic28         | -1.01    | 0.035       | protein_coding                     | ENSMUSG00000033209.17  | 209683    |
| Kirrel        | -1.00    | 0.028       | protein_coding                     | ENSMUSG000000041734.15 | 170643    |
| Ednrb         | -0.99    | 0.017       | protein_coding                     | ENSMUSG0000002122.14   | 13618     |
| Fhd3          | -0.97    | 0.041       | protein_coding                     | ENSMUSG00000034295.9   | 225288    |
| Cep85l        | -0.96    | 0.038       | protein_coding                     | ENSMUSG00000038594.8   | 10038725  |
| Tlr5          | -0.96    | 0.027       | protein_coding                     | ENSMUSG000000079164.8  | 53791     |
| Wnt5a         | -0.95    | 0.044       | protein_coding                     | ENSMUSG00000021994.14  | 22418     |
| Arhgap29      | -0.95    | 0.036       | protein_coding                     | ENSMUSG00000039831.16  | 214137    |
| Sik2          | -0.95    | 0.044       | protein_coding                     | ENSMUSG00000037112.16  | 235344    |
| Hipk2         | -0.95    | 0.032       | protein_coding                     | ENSMUSG00000061436.15  | 15258     |
| Tanc1         | -0.95    | 0.033       | protein_coding                     | ENSMUSG00000035168.16  | 66860     |
| Sax1          | -0.94    | 0.041       | protein_coding                     | ENSMUSG00000028007.13  | 76561     |
| Lrg1          | -0.94    | 0.023       | protein_coding                     | ENSMUSG00000037095.7   | 76905     |
| Limch1        | -0.93    | 0.023       | protein_coding                     | ENSMUSG00000037736.18  | 77569     |
| Rnf125        | -0.93    | 0.033       | protein_coding                     | ENSMUSG00000033107.5   | 67664     |
| Fat4          | -0.93    | 0.045       | protein_coding                     | ENSMUSG00000046743.6   | 329628    |
| 4931406P16Rik | -0.92    | 0.024       | protein_coding                     | ENSMUSG00000066571.13  | 233103    |
| Mxra8         | -0.92    | 0.032       | protein_coding                     | ENSMUSG00000029070.9   | 74761     |
| Arid5b        | -0.91    | 0.038       | protein_coding                     | ENSMUSG00000019947.9   | 71371     |
| Klhl29        | -0.90    | 0.020       | protein_coding                     | ENSMUSG00000020627.9   | 208439    |
| Prr16         | -0.87    | 0.040       | protein_coding                     | ENSMUSG00000073565.4   | 71373     |
| Prps1         | -0.86    | 0.032       | protein_coding                     | ENSMUSG00000031432.3   | 19139     |
| Kif13b        | -0.86    | 0.021       | protein_coding                     | ENSMUSG00000060012.7   | 16554     |
| Lamc1         | -0.84    | 0.048       | protein_coding                     | ENSMUSG00000026478.14  | 226519    |
| Cela1         | -0.84    | 0.047       | protein_coding                     | ENSMUSG00000023031.7   | 109901    |
| Gpm           | -0.84    | 0.043       | protein_coding                     | ENSMUSG00000024978.10  | 14732     |
| Gm14399       | -0.84    | 0.048       | protein_coding                     | ENSMUSG00000090093.8   | 100043761 |
| Atp8b1        | -0.83    | 0.019       | protein_coding                     | ENSMUSG00000035929.8   | 54670     |

|               |      |       |                        |                        |           |          |       |       |                |                       |           |
|---------------|------|-------|------------------------|------------------------|-----------|----------|-------|-------|----------------|-----------------------|-----------|
| Dnph1         | 2.37 | 0.011 | protein_coding         | ENSMUSG0000040658.6    | 381101    | Gm14410  | -0.64 | 0.041 | protein_coding | ENSMUSG00000078870.9  | 100043403 |
| Gm22083       | 2.33 | 0.037 | snRNA                  | ENSMUSG00000088211.1   | NA        | Ttc7b    | -0.63 | 0.045 | protein_coding | ENSMUSG00000033530.7  | 104718    |
| Scimp         | 2.32 | 0.026 | protein_coding         | ENSMUSG00000057135.12  | 327957    | Klhd10   | -0.63 | 0.022 | protein_coding | ENSMUSG00000029775.14 | 76788     |
| Gm22716       | 2.27 | 0.040 | snRNA                  | ENSMUSG00000095178.1   | NA        | Piezo1   | -0.62 | 0.040 | protein_coding | ENSMUSG00000014444.17 | 234839    |
| Fut7          | 2.24 | 0.048 | protein_coding         | ENSMUSG00000036587.13  | 14347     | Pgd      | -0.61 | 0.042 | protein_coding | ENSMUSG00000028961.15 | 110208    |
| Gm37009       | 2.24 | 0.022 | processed_pseudogene   | ENSMUSG00000103880.1   | NA        | Notch1   | -0.60 | 0.048 | protein_coding | ENSMUSG00000026923.15 | 18128     |
| Gm12407       | 2.23 | 0.048 | unprocessed_pseudogene | ENSMUSG00000095298.2   | NA        | Alg10b   | -0.60 | 0.014 | protein_coding | ENSMUSG00000075470.1  | 380959    |
| Bcl2a1b       | 2.23 | 0.038 | protein_coding         | ENSMUSG00000089929.1   | 12045     | Rbms3    | -0.59 | 0.025 | protein_coding | ENSMUSG00000039607.15 | 207181    |
| Xlr4c         | 2.21 | 0.023 | protein_coding         | ENSMUSG00000031362.17  | 72891     | Arhgef12 | -0.59 | 0.026 | protein_coding | ENSMUSG00000059495.13 | 69632     |
| Rassf6        | 2.18 | 0.048 | protein_coding         | ENSMUSG00000029370.10  | 73246     | Gm14326  | -0.59 | 0.016 | protein_coding | ENSMUSG00000035372.1  | NA        |
| Trav4-4-dv10  | 2.07 | 0.047 | TR_V_gene              | ENSMUSG00000096096.3   | NA        | Gm14326  | -0.59 | 0.028 | protein_coding | ENSMUSG00000028923.15 | 665211    |
| Gm23543       | 2.01 | 0.041 | snRNA                  | ENSMUSG00000088832.1   | NA        | Bmp2     | -0.58 | 0.041 | protein_coding | ENSMUSG00000067336.6  | 12168     |
| 4930589L23Rik | 2.00 | 0.031 | lincRNA                | ENSMUSG00000068957.1   | 75879     | Gclm     | -0.58 | 0.014 | protein_coding | ENSMUSG00000028124.15 | 14630     |
| Hc            | 1.98 | 0.005 | protein_coding         | ENSMUSG00000026874.10  | 15139     | Ptp4a1   | -0.58 | 0.021 | protein_coding | ENSMUSG00000046044.15 | 19243     |
| Clec4e        | 1.93 | 0.028 | protein_coding         | ENSMUSG00000030142.10  | 56619     | Xrcc2    | -0.57 | 0.045 | protein_coding | ENSMUSG00000028933.11 | 57434     |
| Cd24a         | 1.92 | 0.018 | protein_coding         | ENSMUSG00000047139.8   | 12484     | Elmod2   | -0.57 | 0.044 | protein_coding | ENSMUSG00000035151.12 | 244548    |
| Mir703        | 1.89 | 0.018 | miRNA                  | ENSMUSG00000105814.1   | 735265    | Sipal11  | -0.57 | 0.007 | protein_coding | ENSMUSG00000042700.15 | 217692    |
| Ifitm1        | 1.87 | 0.022 | protein_coding         | ENSMUSG00000025491.14  | 68713     | Ttc30b   | -0.57 | 0.050 | protein_coding | ENSMUSG00000075273.4  | 72421     |
| Plac8         | 1.86 | 0.004 | protein_coding         | ENSMUSG00000029322.12  | 231507    | Ccser2   | -0.56 | 0.041 | protein_coding | ENSMUSG00000050890.14 | 72972     |
| Clec2g        | 1.80 | 0.044 | protein_coding         | ENSMUSG00000000248.16  | 70809     | Vkorc111 | -0.56 | 0.038 | protein_coding | ENSMUSG00000066735.8  | 69568     |
| Gm9025        | 1.80 | 0.041 | processed_pseudogene   | ENSMUSG00000082433.2   | NA        | Nek6     | -0.56 | 0.019 | protein_coding | ENSMUSG00000026749.11 | 59126     |
| I830077J02Rik | 1.74 | 0.005 | protein_coding         | ENSMUSG00000074342.3   | 433638    | Dram1    | -0.56 | 0.039 | protein_coding | ENSMUSG00000020057.2  | 71712     |
| A530040E14Rik | 1.74 | 0.034 | antisense              | ENSMUSG00000072109.11  | 621875    | Usp46    | -0.55 | 0.029 | protein_coding | ENSMUSG00000054814.14 | 69727     |
| Lst1          | 1.74 | 0.048 | protein_coding         | ENSMUSG000000078412.6  | 16988     | Pvr      | -0.55 | 0.047 | protein_coding | ENSMUSG00000040511.14 | 52118     |
| Ly6c2         | 1.72 | 0.012 | protein_coding         | ENSMUSG00000022584.14  | 100041546 | Stambp11 | -0.55 | 0.020 | protein_coding | ENSMUSG00000024776.17 | 76630     |
| Stab2         | 1.72 | 0.024 | protein_coding         | ENSMUSG00000035459.15  | 192188    | Atl3     | -0.54 | 0.029 | protein_coding | ENSMUSG00000024759.10 | 109168    |
| 5430427019Rik | 1.66 | 0.007 | protein_coding         | ENSMUSG00000025058.4   | 71398     | Nrip1    | -0.54 | 0.048 | protein_coding | ENSMUSG00000048490.13 | 268903    |
| Rshp1         | 1.66 | 0.033 | protein_coding         | ENSMUSG00000024033.9   | 22092     | Atg9a    | -0.54 | 0.020 | protein_coding | ENSMUSG00000033124.15 | 245860    |
| Hba-a2        | 1.65 | 0.020 | protein_coding         | ENSMUSG00000069917.7   | 110257    | Mical3   | -0.53 | 0.050 | protein_coding | ENSMUSG00000051586.16 | 194401    |
| AU021092      | 1.63 | 0.005 | protein_coding         | ENSMUSG000000051669.5  | 239691    | Ssx2zip  | -0.53 | 0.041 | protein_coding | ENSMUSG00000036825.12 | 99167     |
| Asb2          | 1.63 | 0.026 | protein_coding         | ENSMUSG00000021200.14  | 65256     | Irgg     | -0.53 | 0.006 | protein_coding | ENSMUSG00000041037.8  | 210146    |
| Tagap         | 1.63 | 0.038 | protein_coding         | ENSMUSG00000033450.7   | 72536     | Ikbip    | -0.53 | 0.026 | protein_coding | ENSMUSG00000019975.12 | 67454     |
| Ankrd55       | 1.60 | 0.044 | protein_coding         | ENSMUSG00000049985.14  | 77318     | Arhgef11 | -0.53 | 0.018 | protein_coding | ENSMUSG00000041977.18 | 213498    |
| Art4          | 1.59 | 0.022 | protein_coding         | ENSMUSG00000030217.2   | 109978    | Zfp609   | -0.53 | 0.012 | protein_coding | ENSMUSG00000054829.9  | 214812    |
| Soat2         | 1.56 | 0.028 | protein_coding         | ENSMUSG00000023045.12  | 223920    | Bace1    | -0.52 | 0.048 | protein_coding | ENSMUSG00000032086.12 | 23821     |
| Chaf1b        | 1.51 | 0.005 | protein_coding         | ENSMUSG00000022945.11  | 110749    | Atrn     | -0.52 | 0.013 | protein_coding | ENSMUSG00000027312.14 | 11990     |
| E430024P14Rik | 1.48 | 0.031 | antisense              | ENSMUSG00000090069.2   | 100040822 | Sec23a   | -0.52 | 0.030 | protein_coding | ENSMUSG00000020986.13 | 20334     |
| Tox2          | 1.48 | 0.041 | protein_coding         | ENSMUSG00000074607.11  | 269389    | Tmtc3    | -0.52 | 0.032 | protein_coding | ENSMUSG00000036676.14 | 237500    |
| Pilra         | 1.48 | 0.037 | protein_coding         | ENSMUSG00000046245.13  | 231805    | Pdlim7   | -0.52 | 0.024 | protein_coding | ENSMUSG00000021493.15 | 67399     |
| Klh16         | 1.47 | 0.050 | protein_coding         | ENSMUSG00000043008.8   | 239743    | Mtmr9    | -0.51 | 0.044 | protein_coding | ENSMUSG00000035078.5  | 210376    |
| Serp1b1a      | 1.46 | 0.015 | protein_coding         | ENSMUSG00000044734.15  | 66222     | Pomt2    | -0.51 | 0.020 | protein_coding | ENSMUSG00000034126.4  | 217734    |
| Dynl1a        | 1.46 | 0.039 | protein_coding         | ENSMUSG00000092074.1   | 100310872 | Focad    | -0.51 | 0.020 | protein_coding | ENSMUSG00000038368.16 | 230393    |
| Stac2         | 1.45 | 0.020 | protein_coding         | ENSMUSG00000017400.10  | 217154    |          |       |       |                |                       |           |
| Blnk          | 1.41 | 0.048 | protein_coding         | ENSMUSG000000061132.13 | NA        |          |       |       |                |                       |           |
| Irf4          | 1.41 | 0.007 | protein_coding         | ENSMUSG000000021356.9  | 16364     |          |       |       |                |                       |           |
| Pleg2         | 1.41 | 0.040 | protein_coding         | ENSMUSG00000034330.10  | 234779    |          |       |       |                |                       |           |
| Gpr183        | 1.40 | 0.026 | protein_coding         | ENSMUSG000000051212.7  | 321019    |          |       |       |                |                       |           |
| Milr1         | 1.40 | 0.038 | protein_coding         | ENSMUSG00000040528.15  | 380732    |          |       |       |                |                       |           |
| Al1662270     | 1.39 | 0.006 | lincRNA                | ENSMUSG000000087107.7  | 100043636 |          |       |       |                |                       |           |
| Pafah1b3      | 1.39 | 0.032 | protein_coding         | ENSMUSG00000005447.12  | 18476     |          |       |       |                |                       |           |
| Ydjc          | 1.38 | 0.049 | protein_coding         | ENSMUSG000000041774.14 | 69101     |          |       |       |                |                       |           |
| Cd200r3       | 1.37 | 0.026 | protein_coding         | ENSMUSG00000036172.17  | 74603     |          |       |       |                |                       |           |
| Kenk5         | 1.37 | 0.014 | protein_coding         | ENSMUSG00000023243.8   | 16529     |          |       |       |                |                       |           |
| Gm11427       | 1.36 | 0.017 | unprocessed_pseudogene | ENSMUSG000000083161.1  | NA        |          |       |       |                |                       |           |
| H2-Ab1        | 1.35 | 0.016 | protein_coding         | ENSMUSG00000073421.5   | 14961     |          |       |       |                |                       |           |
| Rpsa-ps2      | 1.34 | 0.034 | processed_pseudogene   | ENSMUSG00000045055.4   | NA        |          |       |       |                |                       |           |
| Cd74          | 1.34 | 0.030 | protein_coding         | ENSMUSG00000024610.14  | 16149     |          |       |       |                |                       |           |
| Mmrn1         | 1.30 | 0.025 | protein_coding         | ENSMUSG00000054641.10  | 70945     |          |       |       |                |                       |           |
| H2-Eb1        | 1.30 | 0.021 | protein_coding         | ENSMUSG00000060586.10  | 14969     |          |       |       |                |                       |           |
| Batf          | 1.29 | 0.014 | protein_coding         | ENSMUSG00000034266.5   | 53314     |          |       |       |                |                       |           |
| Dynl1b        | 1.29 | 0.017 | protein_coding         | ENSMUSG00000096255.1   | 21648     |          |       |       |                |                       |           |
| Ncf4          | 1.28 | 0.046 | protein_coding         | ENSMUSG00000071715.11  | 17972     |          |       |       |                |                       |           |
| Lpxn          | 1.28 | 0.013 | protein_coding         | ENSMUSG00000024696.8   | 107321    |          |       |       |                |                       |           |
| H2-Aa         | 1.28 | 0.041 | protein_coding         | ENSMUSG00000036594.14  | 14960     |          |       |       |                |                       |           |
| Cxcr3         | 1.25 | 0.049 | protein_coding         | ENSMUSG00000050232.6   | 12766     |          |       |       |                |                       |           |
| Stard10       | 1.25 | 0.022 | protein_coding         | ENSMUSG00000030688.15  | 56018     |          |       |       |                |                       |           |
| Ezr           | 1.25 | 0.038 | protein_coding         | ENSMUSG00000052397.8   | 22350     |          |       |       |                |                       |           |
| Pycard        | 1.23 | 0.037 | protein_coding         | ENSMUSG00000030793.4   | 66824     |          |       |       |                |                       |           |
| Bst1          | 1.23 | 0.012 | protein_coding         | ENSMUSG00000029082.17  | 12182     |          |       |       |                |                       |           |
| Laptm5        | 1.23 | 0.034 | protein_coding         | ENSMUSG00000028581.17  | NA        |          |       |       |                |                       |           |
| Rragd         | 1.23 | 0.043 | protein_coding         | ENSMUSG00000028278.14  | 52187     |          |       |       |                |                       |           |
| Itgb7         | 1.22 | 0.045 | protein_coding         | ENSMUSG00000001281.9   | 16421     |          |       |       |                |                       |           |
| H2-T-ps       | 1.22 | 0.033 | unprocessed_pseudogene | ENSMUSG00000073405.6   | 667803    |          |       |       |                |                       |           |
| Cd48          | 1.20 | 0.034 | protein_coding         | ENSMUSG00000015355.13  | 12506     |          |       |       |                |                       |           |
| H2-K2         | 1.19 | 0.007 | unprocessed_pseudogene | ENSMUSG00000067203.7   | NA        |          |       |       |                |                       |           |
| Fermt3        | 1.19 | 0.045 | protein_coding         | ENSMUSG00000024965.8   | 108110    |          |       |       |                |                       |           |
| Gmfg          | 1.19 | 0.020 | protein_coding         | ENSMUSG00000060791.15  | 63986     |          |       |       |                |                       |           |
| Slc2a3        | 1.18 | 0.030 | protein_coding         | ENSMUSG00000003153.10  | 20527     |          |       |       |                |                       |           |
| Enpp1         | 1.17 | 0.020 | protein_coding         | ENSMUSG00000037370.13  | 18605     |          |       |       |                |                       |           |
| Qprt          | 1.16 | 0.049 | protein_coding         | ENSMUSG000000030674.5  | 67375     |          |       |       |                |                       |           |
| Nrg2          | 1.16 | 0.044 | protein_coding         | ENSMUSG00000060275.11  | 100042150 |          |       |       |                |                       |           |
| Ptpn18        | 1.16 | 0.040 | protein_coding         | ENSMUSG00000026126.15  | 19253     |          |       |       |                |                       |           |
| Itga2b        | 1.15 | 0.028 | protein_coding         | ENSMUSG00000034664.13  | 16399     |          |       |       |                |                       |           |
| Slc16a3       | 1.15 | 0.026 | protein_coding         | ENSMUSG00000025161.16  | 80879     |          |       |       |                |                       |           |
| Cbr3          | 1.13 | 0.028 | protein_coding         | ENSMUSG00000022947.7   | 109857    |          |       |       |                |                       |           |
| Gm9843        | 1.13 | 0.011 | protein_coding         | ENSMUSG00000050299.7   | NA        |          |       |       |                |                       |           |
| Pstpip1       | 1.11 | 0.045 | protein_coding         | ENSMUSG00000032322.14  | 19200     |          |       |       |                |                       |           |
| Gm14586       | 1.11 | 0.022 | processed_pseudogene   | ENSMUSG00000083621.1   | NA        |          |       |       |                |                       |           |
| H2-DMa        | 1.11 | 0.049 | protein_coding         | ENSMUSG00000037649.9   | 14998     |          |       |       |                |                       |           |
| Ifi30         | 1.10 | 0.043 | protein_coding         | ENSMUSG000000031838.7  | 65972     |          |       |       |                |                       |           |
| Kif19a        | 1.10 | 0.038 | protein_coding         | ENSMUSG00000010021.13  | NA        |          |       |       |                |                       |           |
| Syk           | 1.09 | 0.041 | protein_coding         | ENSMUSG00000021457.14  | 20963     |          |       |       |                |                       |           |
| Prkcz         | 1.09 | 0.041 | protein_coding         | ENSMUSG00000029053.16  | 18762     |          |       |       |                |                       |           |
| B3gnt8        | 1.09 | 0.036 | protein_coding         | ENSMUSG00000059479.7   | 232984    |          |       |       |                |                       |           |
| Donson        | 1.08 | 0.003 | protein_coding         | ENSMUSG00000022960.12  | 60364     |          |       |       |                |                       |           |
| Arhgd1b       | 1.07 | 0.041 | protein_coding         | ENSMUSG00000030220.13  | 11857     |          |       |       |                |                       |           |
| Aprt          | 1.07 | 0.017 | protein_coding         | ENSMUSG00000006589.8   | 11821     |          |       |       |                |                       |           |
| Rps3a1        | 1.06 | 0.044 | protein_coding         | ENSMUSG00000028081.6   | 20091     |          |       |       |                |                       |           |
| Syt13         | 1.04 | 0.031 | protein_coding         | ENSMUSG000000041831.15 | 83672     |          |       |       |                |                       |           |
| Tmem154       | 1.04 | 0.039 | protein_coding         | ENSMUSG00000056498.13  | 320782    |          |       |       |                |                       |           |
| AU020206      | 1.04 | 0.034 | lincRNA                | ENSMUSG00000097415.2   | NA        |          |       |       |                |                       |           |
| Sp3os         | 1.04 | 0.015 | antisense              | ENSMUSG00000063714.15  | NA        |          |       |       |                |                       |           |
| Sdf211        | 1.03 | 0.022 | protein_coding         | ENSMUSG00000022769.7   | 64136     |          |       |       |                |                       |           |
| Ncf1          | 1.03 | 0.042 | protein_coding         | ENSMUSG00000015950.13  | 17969     |          |       |       |                |                       |           |

|               |      |       |                                    |                       |           |
|---------------|------|-------|------------------------------------|-----------------------|-----------|
| Frat1         | 1.02 | 0.011 | protein_coding                     | ENSMUSG00000067199.4  | 14296     |
| Rnaset2a      | 1.02 | 0.005 | protein_coding                     | ENSMUSG00000095687.1  | 100037283 |
| Tiam2         | 1.01 | 0.043 | protein_coding                     | ENSMUSG00000023800.14 | 24001     |
| Rps27         | 1.01 | 0.008 | protein_coding                     | ENSMUSG00000090733.6  | 57294     |
| 4930404105Rik | 1.01 | 0.049 | processed_transcript               | ENSMUSG00000087354.1  | 67394     |
| Cenph         | 1.01 | 0.047 | protein_coding                     | ENSMUSG00000045273.8  | 26886     |
| Rps10-ps1     | 0.99 | 0.006 | processed_pseudogene               | ENSMUSG00000060438.5  | NA        |
| Zfas1         | 0.99 | 0.007 | processed_transcript               | ENSMUSG00000074578.13 | 68949     |
| Dynl1c        | 0.99 | 0.006 | protein_coding                     | ENSMUSG0000000579.14  | 100040563 |
| Cnp           | 0.97 | 0.005 | protein_coding                     | ENSMUSG0000006782.16  | 12799     |
| Mcoln2        | 0.97 | 0.044 | protein_coding                     | ENSMUSG00000011008.13 | 68279     |
| Tmem181b-ps   | 0.97 | 0.046 | transcribed_unprocessed_pseudogene | ENSMUSG00000096780.7  | NA        |
| Usp11         | 0.96 | 0.038 | protein_coding                     | ENSMUSG00000031066.10 | 236733    |
| Rpl28-ps1     | 0.96 | 0.001 | processed_pseudogene               | ENSMUSG00000058603.10 | NA        |
| Trpv2         | 0.95 | 0.007 | protein_coding                     | ENSMUSG00000018507.16 | 22368     |
| Arid3a        | 0.93 | 0.045 | protein_coding                     | ENSMUSG00000019564.12 | 13496     |
| Hcls1         | 0.93 | 0.022 | protein_coding                     | ENSMUSG00000022831.14 | 15163     |
| Shmt1         | 0.93 | 0.048 | protein_coding                     | ENSMUSG00000020534.14 | 20425     |
| Sh3bgrl3      | 0.93 | 0.050 | protein_coding                     | ENSMUSG00000028843.8  | 73723     |
| Cfp           | 0.92 | 0.016 | protein_coding                     | ENSMUSG00000001128.7  | 18636     |
| Socs3         | 0.92 | 0.028 | protein_coding                     | ENSMUSG00000053113.3  | 12702     |
| Rpl31-ps8     | 0.91 | 0.007 | processed_pseudogene               | ENSMUSG00000067870.5  | NA        |
| Dynl1f        | 0.90 | 0.043 | protein_coding                     | ENSMUSG00000095677.1  | 100040531 |
| Pim1          | 0.90 | 0.026 | protein_coding                     | ENSMUSG00000024014.7  | 18712     |
| Rnaset2b      | 0.90 | 0.008 | protein_coding                     | ENSMUSG00000094724.7  | 68195     |
| Unc93b1       | 0.89 | 0.048 | protein_coding                     | ENSMUSG00000036908.16 | 54445     |
| Accs1         | 0.88 | 0.032 | protein_coding                     | ENSMUSG00000027452.11 | 68738     |
| Rps29         | 0.88 | 0.011 | protein_coding                     | ENSMUSG00000034892.8  | 20090     |
| 2410006H16Rik | 0.88 | 0.022 | processed_transcript               | ENSMUSG00000086841.1  | 69221     |
| Gm10275       | 0.88 | 0.005 | transcribed_processed_pseudogene   | ENSMUSG00000069682.5  | NA        |
| Rps28         | 0.87 | 0.016 | protein_coding                     | ENSMUSG00000067288.12 | 54127     |
| Rps6ka1       | 0.87 | 0.005 | protein_coding                     | ENSMUSG00000003644.17 | 20111     |
| Ii10rb        | 0.86 | 0.008 | protein_coding                     | ENSMUSG00000022969.13 | 16155     |
| Cd82          | 0.85 | 0.034 | protein_coding                     | ENSMUSG00000027215.13 | NA        |
| Stfgalnac3    | 0.85 | 0.040 | protein_coding                     | ENSMUSG00000052544.9  | 20447     |
| Comtd1        | 0.85 | 0.043 | protein_coding                     | ENSMUSG00000021773.10 | 69156     |
| Rps26         | 0.85 | 0.032 | protein_coding                     | ENSMUSG00000025362.5  | 27370     |
| Fbxo5         | 0.84 | 0.038 | protein_coding                     | ENSMUSG00000019773.7  | 67141     |
| Bmyc          | 0.84 | 0.019 | protein_coding                     | ENSMUSG00000049086.8  | 107771    |
| Mis18a        | 0.84 | 0.005 | protein_coding                     | ENSMUSG00000022978.11 | 66578     |
| Cryz11        | 0.84 | 0.008 | protein_coding                     | ENSMUSG00000058240.13 | 66609     |
| Smim11        | 0.83 | 0.008 | protein_coding                     | ENSMUSG00000051989.11 | 68936     |
| Hpse          | 0.83 | 0.044 | protein_coding                     | ENSMUSG00000035273.14 | 15442     |
| Rpl37a        | 0.82 | 0.013 | protein_coding                     | ENSMUSG00000046330.10 | 19981     |
| Sft2d1        | 0.82 | 0.001 | protein_coding                     | ENSMUSG00000073468.11 | 106489    |
| Gm2000        | 0.82 | 0.008 | protein_coding                     | ENSMUSG00000078193.2  | NA        |
| Psbm8         | 0.81 | 0.017 | protein_coding                     | ENSMUSG00000024338.14 | 16913     |
| Kcnab2        | 0.81 | 0.036 | protein_coding                     | ENSMUSG00000028931.11 | 16498     |
| Cdt1          | 0.81 | 0.040 | protein_coding                     | ENSMUSG00000006585.3  | 67177     |
| Stxbp2        | 0.81 | 0.010 | protein_coding                     | ENSMUSG00000004626.14 | 20911     |
| Fxyd5         | 0.81 | 0.049 | protein_coding                     | ENSMUSG00000009687.14 | 18301     |
| Sp140         | 0.81 | 0.041 | protein_coding                     | ENSMUSG00000070031.11 | 434484    |
| Sms           | 0.80 | 0.044 | protein_coding                     | ENSMUSG00000071708.11 | 20603     |
| Bace2         | 0.80 | 0.026 | protein_coding                     | ENSMUSG00000040605.6  | 56175     |
| Brwd1         | 0.79 | 0.016 | protein_coding                     | ENSMUSG00000022914.15 | 93871     |
| Tagap1        | 0.79 | 0.026 | protein_coding                     | ENSMUSG00000052031.7  | 380608    |
| Mettl18       | 0.79 | 0.038 | protein_coding                     | ENSMUSG00000041396.13 | NA        |
| Gm9794        | 0.78 | 0.002 | processed_pseudogene               | ENSMUSG00000107176.1  | NA        |
| Clec5a        | 0.78 | 0.021 | protein_coding                     | ENSMUSG00000029915.14 | 23845     |
| Zdhhc14       | 0.78 | 0.024 | protein_coding                     | ENSMUSG00000034265.7  | 224454    |
| Rps15a        | 0.77 | 0.011 | protein_coding                     | ENSMUSG00000008683.16 | 267019    |
| Gm5805        | 0.77 | 0.034 | processed_pseudogene               | ENSMUSG00000061848.5  | NA        |
| Bid           | 0.77 | 0.043 | protein_coding                     | ENSMUSG00000004446.12 | 12122     |
| Coa4          | 0.77 | 0.021 | protein_coding                     | ENSMUSG00000044881.7  | 68185     |
| Rpl34-ps1     | 0.77 | 0.031 | processed_pseudogene               | ENSMUSG00000068396.9  | 619547    |
| Rps24         | 0.76 | 0.006 | protein_coding                     | ENSMUSG00000025290.16 | 20088     |
| Ccdc163       | 0.76 | 0.010 | protein_coding                     | ENSMUSG00000028689.14 | 68394     |
| Rplp1         | 0.76 | 0.003 | protein_coding                     | ENSMUSG00000007892.7  | NA        |
| Slc9a3r1      | 0.76 | 0.049 | protein_coding                     | ENSMUSG00000020733.3  | 26941     |
| Rpsa-ps10     | 0.76 | 0.020 | processed_pseudogene               | ENSMUSG00000047676.6  | NA        |
| Bri3bp        | 0.76 | 0.015 | protein_coding                     | ENSMUSG00000037905.13 | 76809     |
| Hmgn1         | 0.76 | 0.002 | protein_coding                     | ENSMUSG00000040681.14 | 15312     |
| Rpl38         | 0.75 | 0.031 | protein_coding                     | ENSMUSG00000057322.12 | 67671     |
| Rpl23a-ps3    | 0.75 | 0.034 | protein_coding                     | ENSMUSG00000078126.3  | NA        |
| Sod1          | 0.75 | 0.028 | protein_coding                     | ENSMUSG00000022982.9  | 20655     |
| Rps20         | 0.75 | 0.006 | protein_coding                     | ENSMUSG00000028234.6  | 67427     |
| Gm15682       | 0.75 | 0.041 | processed_pseudogene               | ENSMUSG00000095524.1  | 108169053 |
| Rpl23         | 0.75 | 0.003 | protein_coding                     | ENSMUSG00000071415.6  | 65019     |
| Rps19-ps6     | 0.74 | 0.025 | processed_pseudogene               | ENSMUSG00000096942.1  | NA        |
| Rps21         | 0.74 | 0.025 | protein_coding                     | ENSMUSG00000039001.12 | NA        |
| Mif           | 0.74 | 0.044 | protein_coding                     | ENSMUSG00000033307.6  | 17319     |
| Xrcc5         | 0.73 | 0.038 | protein_coding                     | ENSMUSG00000026187.8  | 22596     |
| Gngt2         | 0.73 | 0.040 | protein_coding                     | ENSMUSG00000038811.13 | 14710     |
| Dqx1          | 0.73 | 0.038 | protein_coding                     | ENSMUSG00000009145.6  | 93838     |
| H2-M3         | 0.72 | 0.048 | protein_coding                     | ENSMUSG00000016206.6  | 14991     |
| Rpl12         | 0.72 | 0.025 | protein_coding                     | ENSMUSG00000038900.17 | 269261    |
| Gm15427       | 0.72 | 0.026 | processed_pseudogene               | ENSMUSG00000008105.4  | NA        |
| Fgfr1op       | 0.72 | 0.013 | protein_coding                     | ENSMUSG00000069135.11 | 75296     |
| Tfb1m         | 0.71 | 0.016 | protein_coding                     | ENSMUSG00000036983.6  | 224481    |
| Themis2       | 0.71 | 0.044 | protein_coding                     | ENSMUSG00000037731.5  | 230787    |
| Gm14303       | 0.71 | 0.026 | processed_pseudogene               | ENSMUSG000000081344.5 | NA        |
| Rpl18a        | 0.70 | 0.012 | protein_coding                     | ENSMUSG000000045128.9 | 76808     |
| Dscr3         | 0.70 | 0.007 | protein_coding                     | ENSMUSG00000022898.12 | 13185     |
| Rpl31         | 0.70 | 0.008 | protein_coding                     | ENSMUSG00000073702.11 | 114641    |
| Rpl37         | 0.70 | 0.005 | protein_coding                     | ENSMUSG000000041841.7 | 67281     |
| Rpl21         | 0.70 | 0.048 | protein_coding                     | ENSMUSG00000041453.12 | 19933     |
| Rpl35a        | 0.69 | 0.003 | protein_coding                     | ENSMUSG00000060636.13 | 57808     |
| Ifngr2        | 0.69 | 0.015 | protein_coding                     | ENSMUSG00000022965.7  | 15980     |
| Rps15         | 0.69 | 0.003 | protein_coding                     | ENSMUSG00000063457.14 | 20054     |
| Rps16         | 0.69 | 0.005 | protein_coding                     | ENSMUSG00000037563.15 | 20055     |
| Son           | 0.69 | 0.007 | protein_coding                     | ENSMUSG00000022961.17 | 20658     |
| Rpl36         | 0.69 | 0.012 | protein_coding                     | ENSMUSG00000057863.5  | 54217     |
| Tor4a         | 0.69 | 0.042 | protein_coding                     | ENSMUSG00000059555.6  | 227612    |
| Rpl37rt       | 0.68 | 0.019 | transcribed_processed_pseudogene   | ENSMUSG00000072692.7  | 100502825 |

|               |      |       |                                  |                       |           |
|---------------|------|-------|----------------------------------|-----------------------|-----------|
| Rpl39         | 0.68 | 0.032 | protein_coding                   | ENSMUSG00000079641.3  | NA        |
| Rpl13         | 0.68 | 0.004 | protein_coding                   | ENSMUSG00000000740.12 | 270106    |
| Icam1         | 0.68 | 0.009 | protein_coding                   | ENSMUSG00000037405.7  | 15894     |
| Rpl13a        | 0.67 | 0.032 | protein_coding                   | ENSMUSG00000074129.13 | 22121     |
| Gm7536        | 0.67 | 0.013 | processed_pseudogene             | ENSMUSG00000057036.7  | NA        |
| Rps10         | 0.67 | 0.004 | protein_coding                   | ENSMUSG00000052146.15 | 67097     |
| Gm10132       | 0.67 | 0.013 | processed_pseudogene             | ENSMUSG00000063556.5  | NA        |
| Gsdmd         | 0.66 | 0.040 | protein_coding                   | ENSMUSG00000022575.4  | 69146     |
| Rps23         | 0.66 | 0.002 | protein_coding                   | ENSMUSG00000049517.7  | 66475     |
| Rps17         | 0.66 | 0.008 | protein_coding                   | ENSMUSG00000061787.15 | 20068     |
| Snx5          | 0.66 | 0.043 | protein_coding                   | ENSMUSG00000027423.15 | 69178     |
| Rps5          | 0.66 | 0.013 | protein_coding                   | ENSMUSG00000012848.15 | 20103     |
| Rpl32         | 0.66 | 0.011 | protein_coding                   | ENSMUSG00000057841.5  | 19951     |
| Got2          | 0.66 | 0.035 | protein_coding                   | ENSMUSG00000031672.8  | 14719     |
| Rpl36a        | 0.66 | 0.007 | protein_coding                   | ENSMUSG00000079435.9  | 19982     |
| Casp4         | 0.65 | 0.012 | protein_coding                   | ENSMUSG00000033538.13 | 12363     |
| Rpl28         | 0.65 | 0.013 | protein_coding                   | ENSMUSG00000030432.12 | 19943     |
| Pold4         | 0.65 | 0.011 | protein_coding                   | ENSMUSG00000024854.3  | NA        |
| Tmem242       | 0.65 | 0.022 | protein_coding                   | ENSMUSG0000004945.15  | 70544     |
| Rpl17         | 0.65 | 0.014 | protein_coding                   | ENSMUSG00000062328.7  | 319195    |
| Rfc2          | 0.65 | 0.041 | protein_coding                   | ENSMUSG00000023104.9  | 19718     |
| Rps3          | 0.65 | 0.008 | protein_coding                   | ENSMUSG00000030744.13 | 27050     |
| Nudt8         | 0.65 | 0.038 | protein_coding                   | ENSMUSG00000024869.9  | NA        |
| Snhg8         | 0.65 | 0.032 | processed_transcript             | ENSMUSG00000104960.1  | 69895     |
| Rps13         | 0.64 | 0.004 | protein_coding                   | ENSMUSG00000090862.3  | 68052     |
| Tha1          | 0.64 | 0.019 | protein_coding                   | ENSMUSG00000017713.9  | 71776     |
| Mrpl39        | 0.64 | 0.008 | protein_coding                   | ENSMUSG00000022889.7  | 27393     |
| 1110038B12Rik | 0.64 | 0.043 | processed_transcript             | ENSMUSG00000092203.7  | 68763     |
| Clic1         | 0.64 | 0.036 | protein_coding                   | ENSMUSG00000007041.9  | 114584    |
| Gm9800        | 0.64 | 0.008 | pseudogene                       | ENSMUSG00000045799.5  | NA        |
| Cct8          | 0.64 | 0.007 | protein_coding                   | ENSMUSG00000025613.13 | 12469     |
| Arrb2         | 0.64 | 0.050 | protein_coding                   | ENSMUSG00000060216.15 | 216869    |
| Plcl2         | 0.63 | 0.014 | protein_coding                   | ENSMUSG00000038910.6  | 224860    |
| Snrpg         | 0.63 | 0.031 | protein_coding                   | ENSMUSG00000057278.8  | 68011     |
| Ptma          | 0.63 | 0.048 | protein_coding                   | ENSMUSG00000026238.14 | NA        |
| Atp5j         | 0.63 | 0.015 | protein_coding                   | ENSMUSG00000022890.13 | 11957     |
| Paxbp1        | 0.63 | 0.010 | protein_coding                   | ENSMUSG00000022974.12 | 67367     |
| Gm15500       | 0.63 | 0.022 | transcribed_processed_pseudogene | ENSMUSG00000086583.3  | NA        |
| Rpl27a        | 0.63 | 0.008 | protein_coding                   | ENSMUSG00000046364.14 | 26451     |
| Morc3         | 0.62 | 0.040 | protein_coding                   | ENSMUSG00000039456.9  | 338467    |
| 4933439C10Rik | 0.62 | 0.038 | processed_transcript             | ENSMUSG00000072893.12 | NA        |
| Hn1           | 0.62 | 0.025 | protein_coding                   | ENSMUSG00000020737.12 | NA        |
| Fau           | 0.62 | 0.017 | protein_coding                   | ENSMUSG00000038274.11 | 14109     |
| Zfp513        | 0.62 | 0.021 | protein_coding                   | ENSMUSG00000043059.16 | 101023    |
| Rpl10a        | 0.62 | 0.013 | protein_coding                   | ENSMUSG00000037805.14 | 19896     |
| Atg16l2       | 0.62 | 0.038 | protein_coding                   | ENSMUSG00000047767.17 | 73683     |
| Bach1         | 0.62 | 0.029 | protein_coding                   | ENSMUSG00000025612.5  | 12013     |
| Rpl2211       | 0.62 | 0.013 | protein_coding                   | ENSMUSG00000039221.10 | 68028     |
| Rpl36a-ps2    | 0.62 | 0.041 | processed_pseudogene             | ENSMUSG00000105388.1  | NA        |
| Rpl30         | 0.62 | 0.008 | protein_coding                   | ENSMUSG00000058600.13 | 19946     |
| Ifnar2        | 0.61 | 0.005 | protein_coding                   | ENSMUSG00000022971.18 | 15976     |
| Rpl35         | 0.61 | 0.021 | protein_coding                   | ENSMUSG00000062997.6  | 66489     |
| Abrac1        | 0.61 | 0.039 | protein_coding                   | ENSMUSG00000078453.2  | 73112     |
| Rps9          | 0.61 | 0.005 | protein_coding                   | ENSMUSG0000006333.14  | 76846     |
| Tmem258       | 0.61 | 0.021 | protein_coding                   | ENSMUSG00000036372.14 | 69038     |
| Rps7          | 0.60 | 0.022 | protein_coding                   | ENSMUSG00000061477.3  | 20115     |
| H3f3b         | 0.60 | 0.012 | protein_coding                   | ENSMUSG00000016559.14 | 15081     |
| Rps8          | 0.60 | 0.017 | protein_coding                   | ENSMUSG00000047675.15 | 20116     |
| Rps14         | 0.60 | 0.028 | protein_coding                   | ENSMUSG00000024608.10 | 20044     |
| Rps6          | 0.60 | 0.008 | protein_coding                   | ENSMUSG00000028495.14 | 20104     |
| Samhd1        | 0.60 | 0.028 | protein_coding                   | ENSMUSG00000027639.16 | 56045     |
| RP23-98C9.8   | 0.60 | 0.034 | processed_pseudogene             | ENSMUSG00000110679.1  | NA        |
| Fbl           | 0.60 | 0.017 | protein_coding                   | ENSMUSG00000046865.7  | 14113     |
| Rps4x         | 0.60 | 0.021 | protein_coding                   | ENSMUSG00000031320.9  | 20102     |
| Fam117a       | 0.60 | 0.048 | protein_coding                   | ENSMUSG00000038893.12 | 215512    |
| Hlcs          | 0.59 | 0.005 | protein_coding                   | ENSMUSG00000040820.15 | 110948    |
| Rplp2         | 0.59 | 0.015 | protein_coding                   | ENSMUSG00000025508.13 | 67186     |
| Slc15a4       | 0.59 | 0.020 | protein_coding                   | ENSMUSG00000029416.17 | 100561    |
| Tmsb4x        | 0.59 | 0.047 | protein_coding                   | ENSMUSG00000049775.16 | 19241     |
| Rps12         | 0.58 | 0.025 | protein_coding                   | ENSMUSG00000061983.6  | 20042     |
| Smap2         | 0.58 | 0.039 | protein_coding                   | ENSMUSG00000032870.8  | 69780     |
| Rack1         | 0.58 | 0.022 | protein_coding                   | ENSMUSG00000020372.15 | 14694     |
| Rps25         | 0.58 | 0.026 | protein_coding                   | ENSMUSG00000009927.8  | 75617     |
| Urb1          | 0.58 | 0.021 | protein_coding                   | ENSMUSG00000039929.14 | 207932    |
| BC037034      | 0.58 | 0.049 | protein_coding                   | ENSMUSG00000036948.17 | 231807    |
| Cdkn2d        | 0.58 | 0.018 | protein_coding                   | ENSMUSG00000096472.1  | 12581     |
| Rpsa          | 0.58 | 0.033 | protein_coding                   | ENSMUSG00000032518.5  | 16785     |
| Gm15501       | 0.57 | 0.020 | transcribed_processed_pseudogene | ENSMUSG00000087412.4  | 100040298 |
| Rps11         | 0.57 | 0.013 | protein_coding                   | ENSMUSG0000003429.11  | 27207     |
| Rbm43         | 0.57 | 0.041 | protein_coding                   | ENSMUSG00000036249.16 | 71684     |
| Atp5o         | 0.57 | 0.034 | protein_coding                   | ENSMUSG00000022956.10 | 28080     |
| Dyrk1a        | 0.56 | 0.009 | protein_coding                   | ENSMUSG00000022897.14 | 13548     |
| Dpp7          | 0.56 | 0.028 | protein_coding                   | ENSMUSG00000026958.13 | 83768     |
| Gm12174       | 0.56 | 0.048 | processed_pseudogene             | ENSMUSG00000080776.1  | NA        |
| Rpl7          | 0.56 | 0.023 | protein_coding                   | ENSMUSG00000043716.13 | 19989     |
| Rpl19         | 0.56 | 0.017 | protein_coding                   | ENSMUSG00000017404.12 | 19921     |
| Twf2          | 0.56 | 0.019 | protein_coding                   | ENSMUSG00000023277.11 | NA        |
| Ifnar1        | 0.56 | 0.020 | protein_coding                   | ENSMUSG00000022967.12 | 15975     |
| Rpl5          | 0.56 | 0.026 | protein_coding                   | ENSMUSG00000058558.12 | 100503670 |
| Tpt1-ps3      | 0.56 | 0.045 | processed_pseudogene             | ENSMUSG00000084319.3  | NA        |
| Rpl14         | 0.56 | 0.020 | protein_coding                   | ENSMUSG00000025794.8  | 67115     |
| Otulin        | 0.55 | 0.020 | protein_coding                   | ENSMUSG00000046034.7  | 432940    |
| Ripk3         | 0.55 | 0.043 | protein_coding                   | ENSMUSG00000022221.13 | 56532     |
| 1110004E09Rik | 0.55 | 0.048 | protein_coding                   | ENSMUSG00000022972.9  | 68001     |
| Tpt1          | 0.55 | 0.020 | protein_coding                   | ENSMUSG00000060126.14 | 22070     |
| Sema4b        | 0.55 | 0.047 | protein_coding                   | ENSMUSG00000030539.13 | 20352     |
| Npm1          | 0.55 | 0.025 | protein_coding                   | ENSMUSG00000057113.13 | NA        |
| Lpcat4        | 0.54 | 0.049 | protein_coding                   | ENSMUSG00000027134.4  | 99010     |
| Mfsd10        | 0.54 | 0.031 | protein_coding                   | ENSMUSG00000001082.12 | 68294     |
| Rpl18         | 0.54 | 0.015 | protein_coding                   | ENSMUSG00000059070.16 | 19899     |
| Ppp1r11       | 0.54 | 0.041 | protein_coding                   | ENSMUSG00000036398.13 | 76497     |
| Nsa2          | 0.54 | 0.029 | protein_coding                   | ENSMUSG00000060739.7  | 59050     |
| Eef1b2        | 0.54 | 0.020 | protein_coding                   | ENSMUSG00000025967.16 | 55949     |
| Scly          | 0.53 | 0.013 | protein_coding                   | ENSMUSG00000026307.12 | 50880     |

|           |      |       |                      |                       |        |
|-----------|------|-------|----------------------|-----------------------|--------|
| Gart      | 0.53 | 0.007 | protein_coding       | ENSMUSG00000022962.14 | 14450  |
| Naa10     | 0.53 | 0.020 | protein_coding       | ENSMUSG00000031388.14 | 56292  |
| Rpl9-ps6  | 0.53 | 0.017 | protein_coding       | ENSMUSG00000062456.3  | NA     |
| Rps19     | 0.53 | 0.022 | protein_coding       | ENSMUSG00000040952.16 | 20085  |
| Rps10-ps2 | 0.53 | 0.050 | processed_pseudogene | ENSMUSG00000099764.1  | NA     |
| Rpl10     | 0.53 | 0.034 | protein_coding       | ENSMUSG0000008682.13  | 110954 |
| Rwdd2b    | 0.52 | 0.048 | protein_coding       | ENSMUSG00000041079.11 | 53858  |
| Socs2     | 0.52 | 0.048 | protein_coding       | ENSMUSG00000020027.18 | 216233 |
| Syng2     | 0.52 | 0.019 | protein_coding       | ENSMUSG00000048277.15 | 20973  |
| Gm3362    | 0.52 | 0.028 | processed_pseudogene | ENSMUSG00000085442.1  | NA     |
| Scaf8     | 0.52 | 0.015 | protein_coding       | ENSMUSG00000046201.8  | 106583 |
| Rpl8      | 0.52 | 0.020 | protein_coding       | ENSMUSG0000003970.8   | 26961  |
| Cpe       | 0.52 | 0.026 | protein_coding       | ENSMUSG00000037852.8  | 12876  |
| Usp16     | 0.51 | 0.007 | protein_coding       | ENSMUSG00000025616.14 | 74112  |
| Impdh2    | 0.51 | 0.032 | protein_coding       | ENSMUSG00000062867.13 | 23918  |
| Ccdc12    | 0.51 | 0.031 | protein_coding       | ENSMUSG00000019659.8  | 72654  |
| Rhog      | 0.51 | 0.044 | protein_coding       | ENSMUSG00000073982.11 | 56212  |
| Rpl3      | 0.51 | 0.042 | protein_coding       | ENSMUSG00000060036.13 | 27367  |

Table S6

## Liver up-regulated DEGs

| Gene Symbol   | Log2(FC) | Adj.p-Value | Gene Type              | GencodeID              | EntrezID  |
|---------------|----------|-------------|------------------------|------------------------|-----------|
| Sptlc3        | 5.94     | 0.036       | protein_coding         | ENSMUSG00000039092.9   | NA        |
| Mup-ps4       | 5.39     | 0.037       | unprocessed_pseudogene | ENSMUSG00000078685.6   | NA        |
| Sall4         | 4.65     | 0.023       | protein_coding         | ENSMUSG00000027547.17  | 99377     |
| Tic9          | 4.60     | 0.027       | protein_coding         | ENSMUSG00000042734.5   | 69480     |
| Anxa8         | 3.99     | 0.030       | protein_coding         | ENSMUSG00000021950.15  | 11752     |
| Mup-ps10      | 3.90     | 0.036       | unprocessed_pseudogene | ENSMUSG00000082173.1   | NA        |
| A4gnt         | 3.82     | 0.035       | protein_coding         | ENSMUSG00000037953.7   | 333424    |
| Mep1b         | 3.73     | 0.026       | protein_coding         | ENSMUSG00000024313.7   | 17288     |
| Ccdc92        | 3.70     | 0.027       | protein_coding         | ENSMUSG00000037979.13  | 215707    |
| Prkd1         | 3.46     | 0.027       | protein_coding         | ENSMUSG0000002688.7    | 18760     |
| Gm26736       | 3.39     | 0.048       | TEC                    | ENSMUSG00000097464.1   | NA        |
| Clec4e        | 3.31     | 0.033       | protein_coding         | ENSMUSG00000030142.10  | 56619     |
| Rassf10       | 3.28     | 0.049       | protein_coding         | ENSMUSG00000098132.1   | 78748     |
| Sapcd1        | 3.27     | 0.037       | protein_coding         | ENSMUSG00000036185.9   | 78376     |
| Scn8a         | 3.25     | 0.027       | protein_coding         | ENSMUSG00000023033.14  | 20273     |
| RP23-31314.7  | 3.23     | 0.047       | protein_coding         | ENSMUSG00000011071.0   | NA        |
| Gm26797       | 3.20     | 0.027       | lincRNA                | ENSMUSG00000097572.1   | NA        |
| Col1a1        | 3.17     | 0.037       | protein_coding         | ENSMUSG00000001506.10  | 12842     |
| Igkv9-120     | 3.16     | 0.030       | IG_V_gene              | ENSMUSG00000094872.1   | NA        |
| Klrc1         | 3.10     | 0.022       | protein_coding         | ENSMUSG00000030167.15  | 16641     |
| Cxcl2         | 3.10     | 0.037       | protein_coding         | ENSMUSG00000058427.10  | 20310     |
| Igkv3-12      | 3.04     | 0.031       | IG_V_gene              | ENSMUSG00000094117.1   | NA        |
| Gm44619       | 2.97     | 0.044       | lincRNA                | ENSMUSG000000109141.1  | NA        |
| Dcst1         | 2.91     | 0.031       | protein_coding         | ENSMUSG00000042672.15  | NA        |
| Gnai1         | 2.90     | 0.033       | protein_coding         | ENSMUSG00000057614.6   | 14677     |
| Ighv8-8       | 2.89     | 0.023       | IG_V_gene              | ENSMUSG000000104452.1  | NA        |
| Cyp4a12b      | 2.88     | 0.043       | protein_coding         | ENSMUSG0000007897.2    | 13118     |
| Anks6         | 2.88     | 0.026       | protein_coding         | ENSMUSG00000066191.11  | 75691     |
| Fam83a        | 2.86     | 0.030       | protein_coding         | ENSMUSG00000051225.9   | 239463    |
| 1700112E06Rik | 2.75     | 0.036       | protein_coding         | ENSMUSG00000063458.12  | 76633     |
| Gm10916       | 2.68     | 0.049       | processed_pseudogene   | ENSMUSG00000078125.2   | NA        |
| Cd4207        | 2.67     | 0.047       | protein_coding         | ENSMUSG00000034783.7   | 246278    |
| Gm15922       | 2.65     | 0.049       | polymorphic_pseudogene | ENSMUSG00000081665.2   | 18722     |
| Tmem40        | 2.62     | 0.027       | protein_coding         | ENSMUSG00000059900.14  | 94346     |
| 8030453022Rik | 2.58     | 0.039       | processed_transcript   | ENSMUSG00000085058.2   | 77209     |
| Scube1        | 2.53     | 0.026       | protein_coding         | ENSMUSG00000016763.14  | 64706     |
| Tmem119       | 2.51     | 0.039       | protein_coding         | ENSMUSG00000054675.5   | 231633    |
| H2-M2         | 2.43     | 0.035       | protein_coding         | ENSMUSG00000016283.13  | 14990     |
| Rpl36a-ps1    | 2.39     | 0.044       | processed_pseudogene   | ENSMUSG00000060377.3   | NA        |
| Fkbp10        | 2.37     | 0.033       | protein_coding         | ENSMUSG00000001555.10  | 14230     |
| Aebp1         | 2.34     | 0.022       | protein_coding         | ENSMUSG00000020473.13  | 11568     |
| B430212C06Rik | 2.27     | 0.044       | processed_transcript   | ENSMUSG00000046415.11  | 338360    |
| Fgd1          | 2.16     | 0.037       | protein_coding         | ENSMUSG00000025265.14  | 14163     |
| Fhd1c1        | 2.16     | 0.033       | protein_coding         | ENSMUSG000000041842.15 | 229474    |
| S100a11       | 2.11     | 0.042       | protein_coding         | ENSMUSG00000027907.4   | 20195     |
| Lgals3        | 2.09     | 0.044       | protein_coding         | ENSMUSG00000050355.16  | 16854     |
| Col6a2        | 2.09     | 0.037       | protein_coding         | ENSMUSG00000020241.13  | 12834     |
| Col5a2        | 2.07     | 0.015       | protein_coding         | ENSMUSG00000026042.16  | 12832     |
| Fndc10        | 2.06     | 0.045       | protein_coding         | ENSMUSG000000074738.2  | 230991    |
| Col1a2        | 2.03     | 0.048       | protein_coding         | ENSMUSG00000029661.16  | 12843     |
| Pf4           | 1.99     | 0.028       | protein_coding         | ENSMUSG00000029373.7   | 56744     |
| Cyp17a1       | 1.95     | 0.029       | protein_coding         | ENSMUSG00000003555.7   | 13074     |
| Adap1         | 1.93     | 0.023       | protein_coding         | ENSMUSG00000056413.16  | 231821    |
| Col4a5        | 1.89     | 0.042       | protein_coding         | ENSMUSG000000031274.16 | 12830     |
| Dzip11        | 1.88     | 0.041       | protein_coding         | ENSMUSG00000037784.14  | 72507     |
| Adamts5       | 1.81     | 0.031       | protein_coding         | ENSMUSG00000022894.5   | 23794     |
| Gpx3          | 1.81     | 0.009       | protein_coding         | ENSMUSG00000018339.11  | 14778     |
| Htra1         | 1.78     | 0.030       | protein_coding         | ENSMUSG00000006205.13  | 56213     |
| Cd63          | 1.74     | 0.030       | protein_coding         | ENSMUSG00000002531.13  | 12512     |
| Ezr           | 1.74     | 0.026       | protein_coding         | ENSMUSG00000052397.8   | 22350     |
| 4632428C04Rik | 1.72     | 0.035       | lincRNA                | ENSMUSG00000097184.1   | 100043102 |
| Cx3c11        | 1.72     | 0.044       | protein_coding         | ENSMUSG000000031778.13 | 20312     |
| Npdc1         | 1.72     | 0.033       | protein_coding         | ENSMUSG00000015094.16  | 18146     |
| Col6a1        | 1.70     | 0.029       | protein_coding         | ENSMUSG0000000119.7    | 12833     |
| Col3a1        | 1.67     | 0.037       | protein_coding         | ENSMUSG00000026043.18  | 12825     |
| Txbk1         | 1.65     | 0.015       | protein_coding         | ENSMUSG00000015599.8   | 106763    |
| Loxl2         | 1.62     | 0.043       | protein_coding         | ENSMUSG00000034205.16  | 94352     |
| Prrx1         | 1.59     | 0.042       | protein_coding         | ENSMUSG00000026586.16  | 18933     |
| Slc35f2       | 1.58     | 0.023       | protein_coding         | ENSMUSG000000042195.8  | 72022     |
| Fgfr1         | 1.55     | 0.035       | protein_coding         | ENSMUSG000000031565.18 | 14182     |
| Pik7          | 1.53     | 0.027       | protein_coding         | ENSMUSG000000023972.9  | 71461     |
| Tnfrsf23      | 1.53     | 0.037       | protein_coding         | ENSMUSG000000037613.16 | 79201     |
| Ifit2         | 1.50     | 0.036       | protein_coding         | ENSMUSG00000045932.12  | 15958     |
| Arhgap10      | 1.50     | 0.037       | protein_coding         | ENSMUSG000000037148.8  | 78514     |
| Ifit212b      | 1.48     | 0.046       | protein_coding         | ENSMUSG00000021208.9   | 217845    |
| Sirpa         | 1.48     | 0.041       | protein_coding         | ENSMUSG00000037902.18  | 19261     |
| Atp8b2        | 1.46     | 0.036       | protein_coding         | ENSMUSG000000060671.12 | 54667     |
| Vim           | 1.45     | 0.031       | protein_coding         | ENSMUSG000000026728.9  | 22352     |
| Septn1        | 1.45     | 0.027       | protein_coding         | ENSMUSG00000050989.9   | 74777     |
| Mmp2          | 1.43     | 0.044       | protein_coding         | ENSMUSG000000031740.8  | 17390     |
| Serpinb6b     | 1.43     | 0.042       | protein_coding         | ENSMUSG00000042842.10  | 20708     |
| Mx1           | 1.43     | 0.040       | protein_coding         | ENSMUSG00000000386.14  | NA        |
| Entpd2        | 1.43     | 0.027       | protein_coding         | ENSMUSG00000015085.8   | 12496     |
| Ddr1          | 1.40     | 0.030       | protein_coding         | ENSMUSG00000003534.17  | 12305     |
| Hlcs          | 1.38     | 0.022       | protein_coding         | ENSMUSG00000040820.15  | 110948    |
| Vopp1         | 1.37     | 0.031       | protein_coding         | ENSMUSG000000037788.14 | 232023    |
| Olfml3        | 1.33     | 0.031       | protein_coding         | ENSMUSG000000027848.12 | 99543     |
| Pdlim2        | 1.32     | 0.026       | protein_coding         | ENSMUSG000000022090.10 | 213019    |
| Ccdc80        | 1.32     | 0.030       | protein_coding         | ENSMUSG00000022665.14  | 67896     |
| Tmsb10        | 1.31     | 0.041       | protein_coding         | ENSMUSG000000079523.8  | 19240     |
| Agap2         | 1.31     | 0.035       | protein_coding         | ENSMUSG000000025422.8  | 216439    |
| Cd74          | 1.29     | 0.043       | protein_coding         | ENSMUSG000000024610.14 | 16149     |
| Ugt1a9        | 1.27     | 0.040       | protein_coding         | ENSMUSG000000090175.1  | 394434    |
| Gm12166       | 1.27     | 0.026       | protein_coding         | ENSMUSG00000069899.3   | NA        |
| Itih5         | 1.25     | 0.049       | protein_coding         | ENSMUSG000000025780.7  | 209378    |
| Gm26719       | 1.24     | 0.044       | lincRNA                | ENSMUSG00000097364.1   | NA        |

## Liver down-regulated DEGs

| Gene Symbol   | Log2(FC) | Adj.p-Value | Gene Type            | GencodeID              | EntrezID  |
|---------------|----------|-------------|----------------------|------------------------|-----------|
| Gm27206       | -3.79    | 0.045       | antisense            | ENSMUSG00000098889.1   | NA        |
| 493056N13Rik  | -3.41    | 0.033       | antisense            | ENSMUSG00000092399.1   | 75285     |
| Gm867         | -3.41    | 0.031       | antisense            | ENSMUSG00000050157.5   | 333670    |
| Gm19721       | -3.36    | 0.023       | TEC                  | ENSMUSG00000010232.4   | NA        |
| Crybg3        | -3.13    | 0.028       | processed_transcript | ENSMUSG00000091562.3   | NA        |
| D430018E03Rik | -3.12    | 0.049       | sense_intronic       | ENSMUSG00000097559.1   | NA        |
| 322440L13Rik  | -3.04    | 0.030       | lincRNA              | ENSMUSG00000073590.3   | NA        |
| Gm43116       | -2.96    | 0.030       | processed_pseudogene | ENSMUSG000000104754.1  | NA        |
| Gm17812       | -2.84    | 0.022       | processed_pseudogene | ENSMUSG000000108125.1  | NA        |
| Gm43611       | -2.82    | 0.026       | TEC                  | ENSMUSG000000106030.1  | NA        |
| Gm15890       | -2.80    | 0.044       | antisense            | ENSMUSG00000090105.2   | NA        |
| Gm23084       | -2.75    | 0.037       | rRNA                 | ENSMUSG00000088475.1   | NA        |
| Gm27651       | -2.73    | 0.030       | misc_RNA             | ENSMUSG00000098755.1   | NA        |
| Gm17024       | -2.72    | 0.031       | antisense            | ENSMUSG00000090582.1   | NA        |
| Lcor          | -2.64    | 0.026       | protein_coding       | ENSMUSG00000025019.15  | 212391    |
| Gsta2         | -2.64    | 0.036       | protein_coding       | ENSMUSG00000057933.10  | 14858     |
| 4933411K16Rik | -2.60    | 0.031       | protein_coding       | ENSMUSG00000090369.3   | 66765     |
| Gm26890       | -2.50    | 0.033       | lincRNA              | ENSMUSG00000097246.1   | NA        |
| Gm22881       | -2.46    | 0.045       | snoRNA               | ENSMUSG000000088372.1  | 115486364 |
| F830016B08Rik | -2.43    | 0.009       | protein_coding       | ENSMUSG00000090942.1   | 240328    |
| Pkdrej        | -2.40    | 0.033       | protein_coding       | ENSMUSG00000052496.4   | 18766     |
| A930004J17Rik | -2.40    | 0.022       | TEC                  | ENSMUSG000000102602.1  | NA        |
| Gm38394       | -2.37    | 0.040       | protein_coding       | ENSMUSG00000094410.7   | 667118    |
| Dnajb3        | -2.28    | 0.043       | protein_coding       | ENSMUSG00000081984.3   | 15504     |
| Gm38077       | -2.24    | 0.031       | TEC                  | ENSMUSG000000104344.1  | NA        |
| Gm20274       | -2.23    | 0.033       | sense_intronic       | ENSMUSG000000108551.1  | NA        |
| 2610306G10Rik | -2.17    | 0.023       | TEC                  | ENSMUSG000000108614.1  | NA        |
| RP24-464B16.1 | -2.15    | 0.037       | TEC                  | ENSMUSG000000109836.1  | NA        |
| Ccdc74a       | -2.07    | 0.034       | protein_coding       | ENSMUSG00000041617.10  | 72315     |
| Hpkp2         | -2.05    | 0.003       | protein_coding       | ENSMUSG000000061436.15 | 15258     |
| Gm20476       | -2.04    | 0.029       | antisense            | ENSMUSG00000092364.2   | NA        |
| Uckl1c        | -2.02    | 0.046       | antisense            | ENSMUSG0000001092.10   | 100271841 |
| RP23-466C10.2 | -2.00    | 0.033       | TEC                  | ENSMUSG000000110397.1  | NA        |
| Gm3807        | -1.94    | 0.049       | TEC                  | ENSMUSG000000102881.1  | NA        |
| Zfp871        | -1.80    | 0.015       | protein_coding       | ENSMUSG00000024298.14  | 208292    |
| Tmem253       | -1.74    | 0.031       | protein_coding       | ENSMUSG000000072571.2  | 619301    |
| Lmbrd2        | -1.74    | 0.015       | protein_coding       | ENSMUSG000000039704.6  | 320506    |
| Srcep         | -1.74    | 0.021       | protein_coding       | ENSMUSG00000053877.12  | 100043597 |
| Soga1         | -1.73    | 0.045       | protein_coding       | ENSMUSG00000055485.6   | 320706    |
| Mir1968       | -1.62    | 0.048       | miRNA                | ENSMUSG000000088054.1  | 100316713 |
| RP24-252B21.3 | -1.58    | 0.034       | TEC                  | ENSMUSG000000108825.1  | NA        |
| Gm43481       | -1.56    | 0.026       | TEC                  | ENSMUSG000000107000.1  | NA        |
| 9030616G12Rik | -1.55    | 0.031       | lincRNA              | ENSMUSG00000097691.1   | 77699     |
| 1700109H08Rik | -1.55    | 0.027       | protein_coding       | ENSMUSG000000008307.11 | 77036     |
| RP24-286J21.7 | -1.52    | 0.026       | lincRNA              | ENSMUSG000000110631.1  | NA        |
| Gpr17         | -1.50    | 0.045       | protein_coding       | ENSMUSG00000052229.5   | 574402    |
| Trim80        | -1.48    | 0.027       | protein_coding       | ENSMUSG00000070332.4   | 432613    |
| Cep851        | -1.39    | 0.032       | protein_coding       | ENSMUSG00000038594.8   | 100038725 |
| Foxn3         | -1.38    | 0.027       | protein_coding       | ENSMUSG00000033713.11  | 71375     |
| D330041H03Rik | -1.34    | 0.044       | processed_transcript | ENSMUSG00000073437.10  | 654822    |
| Gm13021       | -1.34    | 0.034       | lincRNA              | ENSMUSG000000086437.2  | 102637389 |
| Pdpr          | -1.34    | 0.016       | protein_coding       | ENSMUSG000000033624.10 | 319518    |
| Lnpep         | -1.31    | 0.042       | protein_coding       | ENSMUSG00000023845.6   | 240028    |
| Nr2c2         | -1.28    | 0.049       | protein_coding       | ENSMUSG00000005893.14  | 22026     |
| Prdm10        | -1.26    | 0.044       | protein_coding       | ENSMUSG00000042496.7   | 382066    |
| A330023F24Rik | -1.25    | 0.037       | processed_transcript | ENSMUSG000000096929.7  | NA        |
| Gm3336        | -1.20    | 0.035       | protein_coding       | ENSMUSG00000095026.2   | 100502950 |
| Lrit1         | -1.15    | 0.049       | protein_coding       | ENSMUSG00000041044.9   | 239037    |
| Eph5          | -1.14    | 0.031       | protein_coding       | ENSMUSG00000034584.3   | 320051    |
| Kihl3         | -1.12    | 0.027       | protein_coding       | ENSMUSG000000014164.14 | 100503085 |
| Ccl25         | -1.10    | 0.022       | protein_coding       | ENSMUSG00000023235.14  | 20300     |
| Kif12         | -1.09    | 0.033       | protein_coding       | ENSMUSG000000072294.4  | 167294    |
| Malat1        | -1.06    | 0.036       | lincRNA              | ENSMUSG00000092341.2   | 72289     |
| Cep97         | -1.04    | 0.036       | protein_coding       | ENSMUSG000000022604.18 | 74201     |
| Ubr4          | -1.04    | 0.003       | protein_coding       | ENSMUSG00000066036.14  | 69116     |
| Kmt2a         | -1.03    | 0.022       | protein_coding       | ENSMUSG00000002028.12  | 214162    |
| Atm           | -1.03    | 0.031       | protein_coding       | ENSMUSG000000034218.15 | 11920     |
| Sned1         | -0.97    | 0.015       | protein_coding       | ENSMUS                 |           |



|               |      |       |                                  |                        |           |          |       |       |                |                        |        |
|---------------|------|-------|----------------------------------|------------------------|-----------|----------|-------|-------|----------------|------------------------|--------|
| Pygb          | 1.24 | 0.022 | protein_coding                   | ENSMUSG00000033059.7   | 110078    | Ago3     | -0.69 | 0.026 | protein_coding | ENSMUSG00000028842.15  | 214150 |
| Cldn14        | 1.22 | 0.038 | protein_coding                   | ENSMUSG00000047109.12  | 56173     | Itn2     | -0.68 | 0.033 | protein_coding | ENSMUSG00000020640.9   | 20403  |
| Rarres1       | 1.21 | 0.049 | protein_coding                   | ENSMUSG00000044904.7   | NA        | Dennd5b  | -0.68 | 0.016 | protein_coding | ENSMUSG00000030313.15  | 320560 |
| Ifngr2        | 1.20 | 0.028 | protein_coding                   | ENSMUSG00000022965.7   | 15980     | Dock9    | -0.65 | 0.044 | protein_coding | ENSMUSG00000025558.16  | 105445 |
| Dynd1l-ps1    | 1.19 | 0.040 | processed_pseudogene             | ENSMUSG00000082691.6   | NA        | Htatip2  | -0.65 | 0.045 | protein_coding | ENSMUSG00000039745.8   | 53415  |
| Gm26809       | 1.19 | 0.030 | lincRNA                          | ENSMUSG00000097815.1   | NA        | Tncf6b   | -0.64 | 0.027 | protein_coding | ENSMUSG00000047888.9   | 213988 |
| Col4a2        | 1.18 | 0.040 | protein_coding                   | ENSMUSG00000031503.13  | 12827     | Ikbkg    | -0.64 | 0.035 | protein_coding | ENSMUSG0000004221.16   | 16151  |
| Ntrk2         | 1.17 | 0.023 | protein_coding                   | ENSMUSG00000052524.14  | 18212     | Deptor   | -0.63 | 0.033 | protein_coding | ENSMUSG00000022419.15  | 97998  |
| Nid1          | 1.16 | 0.031 | protein_coding                   | ENSMUSG00000005397.7   | 18073     | Vps13d   | -0.63 | 0.021 | protein_coding | ENSMUSG00000020220.16  | 230895 |
| Dtx3          | 1.16 | 0.026 | protein_coding                   | ENSMUSG00000040415.15  | 80904     | Hnf1a    | -0.63 | 0.023 | protein_coding | ENSMUSG00000029556.12  | 21405  |
| Synj2         | 1.15 | 0.032 | protein_coding                   | ENSMUSG00000023805.16  | 20975     | Gabpb2   | -0.63 | 0.021 | protein_coding | ENSMUSG00000038766.16  | 213054 |
| Gm10030       | 1.15 | 0.030 | processed_transcript             | ENSMUSG00000057802.8   | 791282    | Srrm2    | -0.63 | 0.029 | protein_coding | ENSMUSG00000039218.16  | 75956  |
| Serpin1a2     | 1.14 | 0.046 | protein_coding                   | ENSMUSG00000041567.3   | 68054     | Zbb20    | -0.63 | 0.028 | protein_coding | ENSMUSG00000022708.16  | 56490  |
| Pkm           | 1.13 | 0.026 | protein_coding                   | ENSMUSG00000032294.16  | 18746     | Ubn2     | -0.63 | 0.023 | protein_coding | ENSMUSG00000038538.17  | 320538 |
| Aco9          | 1.07 | 0.043 | protein_coding                   | ENSMUSG00000025287.15  | 56360     | Kmt2d    | -0.62 | 0.030 | protein_coding | ENSMUSG00000048154.16  | 381022 |
| Iil10b        | 1.07 | 0.042 | protein_coding                   | ENSMUSG00000022969.13  | 16155     | Cbx5     | -0.61 | 0.025 | protein_coding | ENSMUSG00000009575.14  | 12419  |
| Poelce        | 1.06 | 0.026 | protein_coding                   | ENSMUSG00000029718.14  | 18542     | Usp34    | -0.61 | 0.027 | protein_coding | ENSMUSG000000056342.16 | 17847  |
| Tgfb2         | 1.04 | 0.035 | protein_coding                   | ENSMUSG00000032440.12  | NA        | Chd2     | -0.60 | 0.030 | protein_coding | ENSMUSG00000078671.11  | 244059 |
| Ptgm          | 1.01 | 0.047 | protein_coding                   | ENSMUSG00000027864.9   | 19221     | Xpnp3    | -0.60 | 0.035 | protein_coding | ENSMUSG00000022401.11  | 321003 |
| App           | 1.00 | 0.009 | protein_coding                   | ENSMUSG00000022892.10  | 11820     | Kmt2c    | -0.60 | 0.026 | protein_coding | ENSMUSG00000038055.15  | 231051 |
| Icam1         | 0.99 | 0.044 | protein_coding                   | ENSMUSG00000037405.7   | 15894     | Edrf1    | -0.60 | 0.015 | protein_coding | ENSMUSG00000039990.16  | 214764 |
| Rsph3a        | 0.97 | 0.030 | protein_coding                   | ENSMUSG00000073471.2   | 66832     | Ankr28   | -0.59 | 0.044 | protein_coding | ENSMUSG00000014496.7   | 105522 |
| Sytl1         | 0.96 | 0.035 | protein_coding                   | ENSMUSG00000028860.13  | 269589    | Otud3    | -0.59 | 0.046 | protein_coding | ENSMUSG00000004161.8   | 73162  |
| Ets2          | 0.96 | 0.009 | protein_coding                   | ENSMUSG00000022895.14  | 23872     | Wdfy3    | -0.59 | 0.011 | protein_coding | ENSMUSG00000043940.15  | 72145  |
| Ifnar2        | 0.94 | 0.021 | protein_coding                   | ENSMUSG00000022971.18  | 15976     | Sng1     | -0.59 | 0.027 | protein_coding | ENSMUSG000000030655.15 | 233789 |
| Rhbdf1        | 0.93 | 0.026 | protein_coding                   | ENSMUSG00000020282.18  | 13650     | Kif1b    | -0.59 | 0.027 | protein_coding | ENSMUSG00000063077.14  | 16561  |
| Pigp          | 0.91 | 0.016 | protein_coding                   | ENSMUSG00000022940.16  | 56176     | Ep400    | -0.59 | 0.026 | protein_coding | ENSMUSG00000029505.17  | 75560  |
| Farp1         | 0.90 | 0.037 | protein_coding                   | ENSMUSG00000025555.14  | 223254    | Pwyp2a   | -0.58 | 0.041 | protein_coding | ENSMUSG00000044950.7   | 70802  |
| Pea15a        | 0.89 | 0.026 | protein_coding                   | ENSMUSG00000013698.12  | 18611     | Zfp318   | -0.58 | 0.026 | protein_coding | ENSMUSG00000015597.16  | 57908  |
| Mfge8         | 0.89 | 0.027 | protein_coding                   | ENSMUSG00000030605.15  | 17304     | Abcc6    | -0.58 | 0.033 | protein_coding | ENSMUSG00000030834.7   | 27421  |
| Mrap          | 0.87 | 0.026 | protein_coding                   | ENSMUSG00000039956.8   | NA        | Cds2     | -0.58 | 0.009 | protein_coding | ENSMUSG00000058793.14  | 110911 |
| Sod3          | 0.86 | 0.023 | protein_coding                   | ENSMUSG00000072941.5   | 20657     | Dync1h1  | -0.58 | 0.021 | protein_coding | ENSMUSG00000018707.13  | 13424  |
| Ifnar1        | 0.85 | 0.023 | protein_coding                   | ENSMUSG00000022967.12  | 15975     | Nufip2   | -0.57 | 0.031 | protein_coding | ENSMUSG000000037857.16 | 68564  |
| Arhg2         | 0.85 | 0.026 | protein_coding                   | ENSMUSG00000025132.13  | 192662    | Utrn     | -0.57 | 0.033 | protein_coding | ENSMUSG00000019820.9   | 22288  |
| Nagk          | 0.83 | 0.030 | protein_coding                   | ENSMUSG00000034744.13  | 56174     | Spn      | -0.57 | 0.031 | protein_coding | ENSMUSG00000040761.16  | 56381  |
| Csrp1         | 0.83 | 0.044 | protein_coding                   | ENSMUSG00000026421.14  | 13007     | Trap     | -0.57 | 0.026 | protein_coding | ENSMUSG00000045482.16  | 100683 |
| Gtf2h5        | 0.82 | 0.009 | protein_coding                   | ENSMUSG00000034345.14  | 66467     | Map3k2   | -0.57 | 0.009 | protein_coding | ENSMUSG00000023483.8   | 26405  |
| Pla2g15       | 0.82 | 0.028 | protein_coding                   | ENSMUSG00000031903.7   | 192654    | Nipbl    | -0.57 | 0.027 | protein_coding | ENSMUSG00000022141.6   | 71175  |
| Rwdd2b        | 0.81 | 0.025 | protein_coding                   | ENSMUSG00000041079.11  | 53858     | Fryl     | -0.57 | 0.024 | protein_coding | ENSMUSG00000070733.13  | 72313  |
| Rnaset2a      | 0.78 | 0.029 | protein_coding                   | ENSMUSG00000095687.1   | 100037283 | Tmem245  | -0.56 | 0.035 | protein_coding | ENSMUSG00000055296.14  | 242474 |
| Large         | 0.78 | 0.044 | protein_coding                   | ENSMUSG00000004383.18  | 16795     | Nlrp6    | -0.56 | 0.046 | protein_coding | ENSMUSG000000037857.16 | 101613 |
| Scamp5        | 0.76 | 0.043 | protein_coding                   | ENSMUSG00000040722.6   | 56807     | Atrx     | -0.56 | 0.023 | protein_coding | ENSMUSG00000031229.16  | 22589  |
| Tagap1        | 0.75 | 0.023 | protein_coding                   | ENSMUSG000000052031.7  | 380608    | Nktr     | -0.55 | 0.023 | protein_coding | ENSMUSG00000032525.14  | 18087  |
| Magee1        | 0.74 | 0.033 | protein_coding                   | ENSMUSG00000031227.8   | 107528    | Marf1    | -0.55 | 0.035 | protein_coding | ENSMUSG000000060657.7  | 223989 |
| Tmem242       | 0.73 | 0.015 | protein_coding                   | ENSMUSG00000004945.15  | 70544     | Pppf4b   | -0.55 | 0.028 | protein_coding | ENSMUSG00000021413.8   | 19134  |
| Bgn           | 0.73 | 0.031 | protein_coding                   | ENSMUSG00000031375.17  | 12111     | Prc2c    | -0.55 | 0.027 | protein_coding | ENSMUSG000000040225.15 | 226562 |
| Gim1          | 0.73 | 0.037 | protein_coding                   | ENSMUSG00000040006.13  | 215751    | Elk4     | -0.54 | 0.032 | protein_coding | ENSMUSG00000026436.15  | 13714  |
| Mpp6          | 0.73 | 0.026 | protein_coding                   | ENSMUSG00000039680.9   | 121022    | Cep350   | -0.54 | 0.022 | protein_coding | ENSMUSG00000033671.18  | 74081  |
| Rogdi         | 0.71 | 0.046 | protein_coding                   | ENSMUSG00000022540.16  | 66049     | Zfp397   | -0.54 | 0.042 | protein_coding | ENSMUSG00000024276.6   | 69256  |
| Dscr3         | 0.71 | 0.030 | protein_coding                   | ENSMUSG00000022898.12  | 13185     | Lrrc58   | -0.53 | 0.049 | protein_coding | ENSMUSG00000034158.9   | 320184 |
| Emilin1       | 0.69 | 0.033 | protein_coding                   | ENSMUSG00000029163.9   | 100952    | Herc1    | -0.53 | 0.023 | protein_coding | ENSMUSG00000038664.16  | 235439 |
| Tcf3          | 0.66 | 0.021 | protein_coding                   | ENSMUSG00000020167.14  | 21423     | Cramp1   | -0.53 | 0.033 | protein_coding | ENSMUSG00000038002.8   | 57354  |
| Snx9          | 0.66 | 0.021 | protein_coding                   | ENSMUSG00000002365.9   | 66616     | Dnajb1   | -0.53 | 0.032 | protein_coding | ENSMUSG00000005483.10  | 81489  |
| Ttc3          | 0.66 | 0.029 | protein_coding                   | ENSMUSG00000040785.18  | 22129     | Mtfp1    | -0.52 | 0.040 | protein_coding | ENSMUSG00000004748.5   | 67900  |
| Zfp513        | 0.66 | 0.031 | protein_coding                   | ENSMUSG00000043059.16  | 101023    | Kat6a    | -0.52 | 0.044 | protein_coding | ENSMUSG00000031540.13  | 244349 |
| Rgl2          | 0.65 | 0.022 | protein_coding                   | ENSMUSG000000041354.15 | 19732     | Rnf214   | -0.52 | 0.036 | protein_coding | ENSMUSG00000042790.15  | 235315 |
| Igsf5         | 0.63 | 0.025 | protein_coding                   | ENSMUSG0000000159.15   | 72058     | Ubr5     | -0.52 | 0.031 | protein_coding | ENSMUSG00000037487.6   | 70790  |
| Psmg1         | 0.62 | 0.031 | protein_coding                   | ENSMUSG00000022913.14  | 56088     | Macf1    | -0.51 | 0.047 | protein_coding | ENSMUSG00000028649.17  | 11426  |
| Cygb          | 0.61 | 0.044 | protein_coding                   | ENSMUSG00000020810.5   | 114886    | Birc6    | -0.51 | 0.026 | protein_coding | ENSMUSG00000024073.14  | 12211  |
| Dnajc28       | 0.61 | 0.044 | protein_coding                   | ENSMUSG00000039763.9   | 246738    | Dusp11   | -0.51 | 0.041 | protein_coding | ENSMUSG00000030002.15  | 72102  |
| Gm26917       | 0.59 | 0.027 | lincRNA                          | ENSMUSG00000097971.3   | NA        | Pigm     | -0.51 | 0.037 | protein_coding | ENSMUSG000000052029.3  | 67556  |
| 1110004E09Rik | 0.59 | 0.033 | protein_coding                   | ENSMUSG00000022972.9   | 68001     | Mycbp2   | -0.51 | 0.033 | protein_coding | ENSMUSG00000033004.14  | 105689 |
| Dyrk1a        | 0.59 | 0.038 | protein_coding                   | ENSMUSG00000022897.14  | 13548     | Hook1    | -0.51 | 0.023 | protein_coding | ENSMUSG00000028572.13  | 77963  |
| Gm10275       | 0.58 | 0.031 | transcribed_processed_pseudogene | ENSMUSG00000066982.5   | NA        | Ralgapa2 | -0.50 | 0.046 | protein_coding | ENSMUSG00000037110.19  | 241694 |
| Crlf2         | 0.57 | 0.031 | protein_coding                   | ENSMUSG00000033467.12  | 57914     | Dido1    | -0.50 | 0.026 | protein_coding | ENSMUSG00000038914.15  | 23856  |
| Tgfb1         | 0.57 | 0.031 | protein_coding                   | ENSMUSG00000035493.9   | NA        |          |       |       |                |                        |        |
| Scaf8         | 0.57 | 0.047 | protein_coding                   | ENSMUSG00000046201.8   | 106583    |          |       |       |                |                        |        |
| Hmgn1         | 0.56 | 0.026 | protein_coding                   | ENSMUSG00000040681.14  | 15312     |          |       |       |                |                        |        |
| Cryz1l        | 0.55 | 0.029 | protein_coding                   | ENSMUSG00000058240.13  | 66609     |          |       |       |                |                        |        |
| Parp3         | 0.55 | 0.030 | protein_coding                   | ENSMUSG00000023249.14  | 235587    |          |       |       |                |                        |        |
| Itm2c         | 0.54 | 0.044 | protein_coding                   | ENSMUSG00000026223.15  | 64294     |          |       |       |                |                        |        |
| Krcc1         | 0.53 | 0.040 | protein_coding                   | ENSMUSG00000053012.17  | NA        |          |       |       |                |                        |        |
| Nap1l1        | 0.52 | 0.045 | protein_coding                   | ENSMUSG00000058799.14  | 53605     |          |       |       |                |                        |        |
| Fgfr1op       | 0.52 | 0.033 | protein_coding                   | ENSMUSG00000069135.11  | 75296     |          |       |       |                |                        |        |
| Rplp1         | 0.52 | 0.023 | protein_coding                   | ENSMUSG00000007892.7   | NA        |          |       |       |                |                        |        |
| Ifngr1        | 0.51 | 0.040 | protein_coding                   | ENSMUSG00000020009.12  | 15979     |          |       |       |                |                        |        |
| Plvap         | 0.51 | 0.048 | protein_coding                   | ENSMUSG00000034845.6   | 84094     |          |       |       |                |                        |        |
| Usp16         | 0.50 | 0.037 | protein_coding                   | ENSMUSG00000025616.14  | 74112     |          |       |       |                |                        |        |
| Cct8          | 0.50 | 0.028 | protein_coding                   | ENSMUSG00000025613.13  | 12469     |          |       |       |                |                        |        |
